# Supplementary material
Source: PubMed Central journal article supplement (PMC6644469)
Supplement: ao7b00282_si_004.pdf [file ao7b00282_si_004.pdf]

Supporting Information for

**Experimental and computational modeling of H-bonded arginine-tyrosine groupings in aprotic environments.**

Andrew Toyi Banyikwa<sup>§‡</sup>, Alan Goos<sup>§¶</sup>, David J. Kiemle<sup>†</sup>, Michael A. C. Foulkes<sup>§</sup>,  
and Mark S. Braiman<sup>§\*</sup>

<sup>§</sup>Syracuse University, Chemistry Department, Center for Science & Technology  
Room 1-014, Syracuse NY 13244 USA

<sup>†</sup>SUNY College of Environmental Science and Forestry, Analytical and Technical  
Services, 123 Jahn Laboratory, Syracuse NY 13210 USA

Author information: Andrew Banyikwa, [andrew.banyikwa@gmail.com](mailto:andrew.banyikwa@gmail.com); Alan Goos, [aggoos@utep.edu](mailto:aggoos@utep.edu); David R. Kiemle, [dkiemle@esf.edu](mailto:dkiemle@esf.edu); Michael Foulkes, [michaelacfoulkes@gmail.com](mailto:michaelacfoulkes@gmail.com) ; Mark S. Braiman, [mbraiman@syr.edu](mailto:mbraiman@syr.edu)

\*To whom correspondence should be addressed.

<sup>‡</sup>Current address: Chemistry Department, University of Dodoma, Tanzania.

<sup>¶</sup>Current address: Department of Physics, University of Texas, El Paso TX 79968

**Table 1-S.** Gaussian input (.gjf) files corresponding to atomic coordinates for structures in Figure 2; and non-H-bonded reference-energy structures, all computed using DFT *in vacuo*.

%%%%%%%%%%%%%%%%%%%%%%%%%%%%%%%%%%%%%%%%%%%%%%%%%%%%%%%%%%%%%%%%%%%%%%%%%

# rb3lyp/6-311++g

H-bonded p-cresol+ethylguanidine after optimization

```

0 1
N      3.93139100    0.25249600    0.29248700
C      4.63560700   -0.92834500   -0.21298800
C      2.60449100    0.52075400    0.02053500
C      6.01830000   -1.04602900    0.42917100
H      4.04187300   -1.81612600    0.02055300
H      4.73750100   -0.88128600   -1.30437000
H      4.49034800    0.98792700    0.69469600
N      2.08012000    1.62374400    0.65191300
N      1.83230400   -0.18426500   -0.77191700
H      5.93935400   -1.13699800    1.51379000
H      6.63901700   -0.17663000    0.19805300
H      6.53573900   -1.92871000    0.05191000
H      1.11850900    1.86300900    0.43967900
H      2.49858900    1.99511200    1.48552400
H      2.28524800   -0.90935000   -1.31868000
C     -1.67340100    0.51662200   -0.38347600
C     -1.87255300   -0.86728100   -0.29745000
C     -2.75635600    1.37935600   -0.16578300
O     -0.44378700    1.07571400   -0.67384000
C     -3.14238100   -1.37181100    0.00187900
H     -1.04087900   -1.54041500   -0.45964800
C     -4.01503200    0.86085200    0.13272900
H     -2.59288600    2.44588600   -0.24081100
C     -4.23674600   -0.52487700    0.22241400
H     -3.28034500   -2.44528200    0.06390500
H     -4.84150500    1.54338100    0.29692600
C     -5.61102300   -1.07409000    0.53904600
H     -5.99855300   -0.67495700    1.48080000
H     -6.33584800   -0.82211700   -0.24097400
H     -5.58991900   -2.16177900    0.62710400
H      0.33192300    0.41787900   -0.84157100

```

%%%%%%%%%%%%%%%%%%%%%%%%%%%%%%%%%%%%%%%%%%%%%%%%%%%%%%%%%%%%%%%%%%%%%%%%%

# rb3lyp/6-311++g

Ethylguanidine after optimization

```

O 1
N      -0.19413000   -0.40131700   -0.09478400
C      -1.35700500    0.48429600   -0.03606800
C       1.11330700    0.07001300   -0.01194900
C      -2.64939000   -0.32517200    0.07960400
H      -1.24940400    1.13592900    0.83477100
H      -1.40433300    1.13375800   -0.92076100
H      -0.33121800   -1.31192700   -0.50567400
N       2.06519300   -0.94530700   -0.00367700
N       1.50584400    1.30511700    0.05563800
H      -2.64165700   -0.94386700    0.97839900
H      -2.78900500   -0.97748000   -0.78663200
H      -3.51150000    0.34140000    0.13108800
H       3.02136000   -0.63379800    0.02141400
H       1.85904100   -1.82299900    0.44306600
H       0.76689800    1.99470900   -0.08542900

```

%%%%%%%%%%%%%%%%%%%%%%%%%%%%%%%%%%%%%%%%%%%%%%%%%%%%%%%%%%%%%%%%%%%%%%%%%

```
# rb3lyp/6-311++g
```

```
para-cresol in vacuo, after optimization
```

```

O 1
C      -1.43411700   -0.01303300    0.00050600
C      -0.74810800    1.20494100   -0.00109000
C      -0.72899500   -1.22186300   -0.00047500
O      -2.83227700   -0.09865100    0.00048200
C       0.65456700    1.20676600   -0.00221900
H      -1.29345700    2.14566600   -0.00256900
C       0.66726100   -1.20264000   -0.00198900
H      -1.28273500   -2.15397000   -0.00034600
C       1.38726900    0.00941600   -0.00195200
H       1.18157200    2.15708800   -0.00387800
H       1.20900400   -2.14506200   -0.00318800
C       2.90167300    0.01188100    0.00308200
H       3.30167900   -0.44694200    0.91697100
H       3.30790800   -0.55096500   -0.84711900
H       3.29660600    1.03168900   -0.05489600
H      -3.25965600    0.77890200    0.01599900

```

%%%%%%%%%%%%%%%%%%%%%%%%%%%%%%%%%%%%%%%%%%%%%%%%%%%%%%%%%%%%%%%%%%%%%%%%%

```
# rb3lyp/6-311++g
```

```
p-phenol-dodecyl-guanidine internally H-bonded local minimum, optimized
```

```

O 1
C      -3.37848688   -2.11675071    0.40920213
C      -3.95197878   -1.72325099   -0.98399322

```

|   |             |             |             |
|---|-------------|-------------|-------------|
| C | -5.17984135 | -0.77702283 | -0.91795554 |
| C | -4.82631413 | 0.71960959  | -1.06723714 |
| C | -3.79559613 | 1.25406124  | -0.05773977 |
| C | -3.40382383 | 2.72669981  | -0.29673669 |
| C | -2.11316582 | 3.14748135  | 0.44094967  |
| C | -0.83565515 | 2.58093951  | -0.20672153 |
| C | 0.45269639  | 2.83624984  | 0.59387633  |
| C | 1.68898282  | 2.20990237  | -0.07515041 |
| C | 2.98328583  | 2.36441395  | 0.74066149  |
| C | 4.20020250  | 1.67025167  | 0.10475374  |
| N | 4.02168849  | 0.21666454  | 0.09045320  |
| C | 4.55334952  | -0.66740139 | -0.80589352 |
| N | 5.55489990  | -0.19431295 | -1.63233825 |
| N | 4.08244020  | -1.89773016 | -0.83947688 |
| C | -1.86428112 | -2.09924130 | 0.54455242  |
| C | -1.00842380 | -2.56320374 | -0.46671076 |
| C | -1.26919354 | -1.61450408 | 1.72221052  |
| C | 0.38250585  | -2.52724988 | -0.32350439 |
| C | 0.11505234  | -1.57703603 | 1.88294785  |
| C | 0.95436312  | -2.02265460 | 0.85381460  |
| O | 2.31801950  | -1.93025052 | 1.04771082  |
| H | -3.78822735 | -1.44300851 | 1.16591618  |
| H | -3.75872452 | -3.11121589 | 0.67405680  |
| H | -3.17017564 | -1.24140922 | -1.57887097 |
| H | -4.22316942 | -2.63093968 | -1.53001980 |
| H | -5.88600854 | -1.03494690 | -1.71386868 |
| H | -5.71670717 | -0.93979559 | 0.02399449  |
| H | -4.43346166 | 0.87951237  | -2.07945189 |
| H | -5.74587960 | 1.31316368  | -1.00084870 |
| H | -4.18551756 | 1.14878179  | 0.96193562  |
| H | -2.89793923 | 0.63323903  | -0.10509950 |
| H | -3.26565477 | 2.89530852  | -1.37218088 |
| H | -4.23210852 | 3.37539390  | 0.00840325  |
| H | -2.04641403 | 4.24093213  | 0.46806469  |
| H | -2.17120138 | 2.81722472  | 1.48533526  |
| H | -0.94259287 | 1.50083013  | -0.34487518 |
| H | -0.72852658 | 3.00946566  | -1.21107052 |
| H | 0.60450274  | 3.91506352  | 0.72281971  |
| H | 0.33752754  | 2.41611735  | 1.59990058  |
| H | 1.49321047  | 1.14781309  | -0.24842012 |
| H | 1.83359104  | 2.66100085  | -1.06465315 |
| H | 3.22350724  | 3.42577530  | 0.86046389  |
| H | 2.83554227  | 1.96784279  | 1.75167141  |
| H | 4.31724631  | 2.03262003  | -0.92199927 |
| H | 5.10556139  | 1.94823458  | 0.65931729  |
| H | 3.36361019  | -0.19990470 | 0.74352413  |
| H | 5.90820186  | -0.77282583 | -2.37179146 |
| H | 6.01772319  | 0.67964304  | -1.46187030 |
| H | 4.58494523  | -2.55466565 | -1.42922916 |
| H | -1.42617277 | -2.95643060 | -1.38598886 |
| H | -1.90301015 | -1.25513739 | 2.52521173  |
| H | 1.02322653  | -2.88248164 | -1.12008751 |
| H | 0.56364133  | -1.20148792 | 2.79290990  |
| H | 2.93003127  | -2.14182154 | 0.23669323  |

%%%%%%%%%%%%%%%%%%%%%%%%%%%%%%%%%%%%%%%%%%%%%%%%%%%%%%%%%%%%%%%%%%%%%%%%%

# b3lyp/6-311++g

p-phenol-dodecyl-guanidine extended no H-bond local minimum

0 1

|   |              |             |             |
|---|--------------|-------------|-------------|
| C | 5.91043800   | -1.26270600 | -0.02895600 |
| C | 4.68473800   | -0.32060300 | 0.01132900  |
| C | 3.34439600   | -1.07301300 | -0.02451400 |
| C | 2.11941800   | -0.14287800 | -0.00399800 |
| C | 0.77774700   | -0.89453300 | -0.03987400 |
| C | -0.44768800  | 0.03502400  | -0.02745000 |
| C | -1.78916000  | -0.71688100 | -0.06376900 |
| C | -3.01441500  | 0.21293100  | -0.05398100 |
| C | -4.35544200  | -0.53935800 | -0.09515500 |
| C | -5.57920200  | 0.39253900  | -0.08441900 |
| C | -6.91769500  | -0.36270400 | -0.13425500 |
| C | -8.13180100  | 0.57484300  | -0.11603500 |
| N | -9.38059500  | -0.18972700 | -0.19504400 |
| C | 7.23611500   | -0.52873400 | -0.00187100 |
| C | 7.79484600   | -0.00151100 | -1.17952300 |
| C | 7.93029000   | -0.32514500 | 1.19868600  |
| C | 8.99572900   | 0.70625800  | -1.16399400 |
| C | 9.13593600   | 0.38311600  | 1.23167800  |
| C | 9.66272500   | 0.89770400  | 0.04653200  |
| O | 10.86537100  | 1.61496900  | -0.00082000 |
| C | -10.65044600 | 0.28275700  | 0.11939400  |
| N | -11.72704400 | -0.43198500 | 0.27406000  |
| N | -10.73572600 | 1.65547900  | 0.29240600  |
| H | 5.85612800   | -1.95159400 | 0.81996500  |
| H | 5.85060500   | -1.88050400 | -0.93125100 |
| H | 4.73775400   | 0.29580400  | 0.91543800  |
| H | 4.73872700   | 0.37306200  | -0.83500200 |
| H | 3.30580500   | -1.70016400 | -0.92359800 |
| H | 3.29152300   | -1.75949700 | 0.82929300  |
| H | 2.15769300   | 0.48554100  | 0.89386400  |
| H | 2.17239800   | 0.54189100  | -0.85889200 |
| H | 0.74214100   | -1.52647200 | -0.93553400 |
| H | 0.72284600   | -1.57606600 | 0.81761200  |
| H | -0.41226800  | 0.66735900  | 0.86787300  |
| H | -0.39255500  | 0.71613100  | -0.88522900 |
| H | -1.82356000  | -1.35011000 | -0.95852200 |
| H | -1.84494000  | -1.39702500 | 0.79469100  |
| H | -2.98153100  | 0.84404900  | 0.84220400  |
| H | -2.95675500  | 0.89480700  | -0.91093700 |
| H | -4.38846600  | -1.16903200 | -0.99229100 |
| H | -4.41320700  | -1.22181700 | 0.76100800  |
| H | -5.54865600  | 1.01683900  | 0.81606600  |
| H | -5.51699400  | 1.07822900  | -0.93751100 |
| H | -6.95063400  | -0.97805800 | -1.04119400 |
| H | -6.98586400  | -1.04688300 | 0.71792200  |
| H | -8.12681800  | 1.16155600  | 0.80728000  |
| H | -8.04758000  | 1.28042700  | -0.95420800 |
| H | -9.31378800  | -1.16187000 | -0.44626400 |
| H | 7.28459300   | -0.15191400 | -2.12357500 |
| H | 7.52939400   | -0.72610000 | 2.12205600  |
| H | 9.42755700   | 1.10784500  | -2.06968000 |
| H | 9.65733800   | 0.52601000  | 2.17138800  |
| H | 11.28079800  | 1.70035900  | 0.87426800  |
| H | -11.56836300 | -1.44113300 | 0.24205800  |
| H | -11.64823200 | 2.00298600  | 0.53040000  |
| H | -10.09365800 | 2.28658100  | -0.15204300 |

%%%%%%%%%%%%%%%%%%%%%%%%%%%%%%%%%%%%%%%%%%%%%%%%%%%%%%%%%%%%%%%%%%%%%%%%

**Table 2-S.** Summary of how the built-in Solver™ functionality of Excel™ was used in the derivation of the spectrum of *p*-cresol:dodecylguanidine in hexane, and in the derivation of thermodynamic quantities for its dissociation. The Solver™ analysis used as 17 experimental data inputs only the following quantities: In row 1, the 8 *p*-cresol concentrations (dissociated+H-bonded) whose spectra were measured at 58°C; in row 2, the 8 relative concentrations of the H-bonded form, obtained from the first-order results of singular value decomposition (SVD) of the measured difference spectral data from Table 3-S below; and the measured temperature (58°C). The scaling factor *f* was initially set at 1, and ended at 2.90014 as a result of Solver™ optimization. The target of the Solver™ optimization was to minimize the standard deviation of the 8 values of  $\Delta G^\circ$  for the dissociation reaction at 58°C (row 7). These 8 values were derived from the 17 pieces of experimental input data by the following mathematical operations. These were based on the assumption that there were only 2 spectroscopically distinct forms of cresol present: free cresol, and a 1:1 complex of cresol:dodecylguanidine. First, row 3, the concentrations of H-bonded cresol under each set of experimental conditions, was set to be equal to *f* times row 2. Then these H-bonded cresol concentrations in row 3 were subtracted from the total cresol concentrations in row 1, to give the free (non-H-bonded) cresol concentrations in row 4. It was then assumed that free dodecylguanidine was released from the initially dissolved 1:1 solid salt in the same amount as free cresol, so that both their monomer concentrations were equal. Thus the dissociation equilibrium constant (row 5) could be obtained as the square of the free cresol concentration (row 4), divided by the H-bonded cresol concentration (row 3). Eight values of  $\Delta G^\circ$  (row 7) were obtained directly from these equilibrium constants and the temperature. Their standard deviation (not shown) was minimized by using Solver™ to adjust *f*. The data in the 3 right-most columns were obtained at different temperatures, and were not used in the optimization for *f*. However, once the optimized value of *f* was obtained from the data at the lower temperature, it and the relative amounts of the H-bonded form from the same singular value decomposition (last 3 quantities in row 2), were used to obtain equilibrium constants from the data at higher temperatures. These equilibrium constants were used in the van't Hoff plot in Fig. 3 of the main text. Of the 8 different values obtained for  $K_d$  at 58°C, only 0.000104 was used in the van't Hoff plot, because only it was derived from a spectrum measured using the same sample, cuvette, and instrument as the other 3 temperature-dependent spectra.

|                                                                                                                      |          |          |          |          |          |          |          |          |          |          |          |
|----------------------------------------------------------------------------------------------------------------------|----------|----------|----------|----------|----------|----------|----------|----------|----------|----------|----------|
| 1. Total cresol (also total dodecylguanidine), <i>M</i>                                                              | 0.000746 | 0.000497 | 0.000332 | 0.000221 | 0.000147 | 0.000098 | 0.000065 | 0.00074  | 0.00074  | 0.00074  | 0.00074  |
| 2. Relative amounts of H-bonded form (from Singular Value Decomposition of Raw Difference Spectral Data Table below) | 0.000153 | 9.76E-05 | 5.28E-05 | 2.7E-05  | 1.44E-05 | 8.89E-06 | 6.59E-06 | 0.000176 | 0.000171 | 0.000166 | 0.000159 |
| 3. [H-bonded cresol], <i>M</i> (row 2, multiplied by <i>f</i> )                                                      | 0.000444 | 0.000283 | 0.000153 | 7.83E-05 | 4.17E-05 | 2.58E-05 | 1.91E-05 | 0.00051  | 0.000496 | 0.000481 | 0.000461 |
| 4. [Free cresol], <i>M</i> (row 1 minus row 3)                                                                       | 0.000302 | 0.000214 | 0.000179 | 0.000143 | 0.000105 | 7.22E-05 | 4.59E-05 | 0.00023  | 0.000244 | 0.000259 | 0.000279 |
| 5. $K_d = \frac{[\text{Free cresol}]^2}{[\text{H-bonded cresol}]}$                                                   | 0.000205 | 0.000161 | 0.000209 | 0.00026  | 0.000266 | 0.000202 | 0.00011  | 0.000104 | 0.00012  | 0.00014  | 0.000169 |
| 6. <i>T</i> , °C                                                                                                     | 58       | 58       | 58       | 58       | 58       | 58       | 58       | 58       | 60       | 62       | 64       |
| 7. $\Delta G^\circ_{\text{dissoc}} = -RT \ln(K_d)$                                                                   | 23381.76 | 24039.22 | 23329.36 | 22729.16 | 22667.81 | 23417.01 | 25090.71 | 25245.02 |          |          |          |

**Table 3-S.** Spectral data used in Figure 3 of the paper, and in deriving the quantities in row 2 of Table 2-S above via singular value decomposition (SVD). Column 1 represent the wavelengths measured, for each of the extinction absorbance or values in columns 2-14. The spectrum in column 2 is that of (monomeric) *p*-cresol in hexane at 58°C. The raw measured absorbance values were converted to  $\epsilon$  values by dividing by the pathlength (1 cm) and by the concentration used (0.001 M). This spectrum of pure *p*-cresol in hexane showed no measurable temperature or concentration dependence over the range of 58-64°C or 0.1-10 mM, so it was used for all subsequent computations. Columns 3 through 13 represent absorbance difference spectra of *p*-cresol:dodecylguanidine minus free *p*-cresol. Each was obtained as a difference between 2 measured spectra. The first was the spectrum of 1:1 *p*-cresol:dodecylguanidine, measured at the indicated total concentration with a 1-cm pathlength. From this was subtracted the extinction-coefficient spectrum of *p*-cresol in column 2, after being multiplied by the total concentration used for the *p*-cresol:dodecylguanidine measurement. Presenting the measured data as difference spectra in this fashion is intended to enable the quick recovery of the raw measured absorbance spectra (which is what is actually presented in Fig. 3A and 3B of the main paper), while also simplifying the explanation of the SVD analysis, performed as follows. The data table of difference spectra, outlined with doubled-line borders in Table 3-S, was transferred to Matlab as a matrix **M** with 11 columns and 501 rows. It was then subjected to singular-value decomposition (SVD), for which only the first-order result was saved. This first-order result was  $\mathbf{M} \approx \mathbf{U}(1) S(1) \mathbf{V}^t(1)$ , where **U**(1) is a unitary column matrix representing the single spectral shape that best fits the shape of all the 11 input difference spectra, when multiplied by the number *S*(1) and by **V**<sup>t</sup>(1), a unitary 11-element row matrix representing the best fit for the relative magnitudes of **U**(1) in each of 11 measured data columns. The unitary row vector **V**<sup>t</sup>(1) obtained from SVD was arbitrarily divided by 2500, and then column vector **U**(1) was multiplied by 2500\*S, in order to produce reasonably-scaled initial guesses for the extinction-coefficient difference spectrum of *p*-cresol:dodecylguanidine-minus-*p*-cresol, and the relative concentrations of the 1:1 complex that were used in row 2 of table 2-S above. After optimization described in the caption to table 2-S, the concentrations were all adjusted upward by the optimized value of *f* (2.90014), and the extinction-coefficient values were corrected by dividing by the same factor, to give the final extinction-coefficient difference spectrum for *p*-cresol:dodecylguanidine-minus-*p*-cresol (not shown). The original *p*-cresol spectrum (column 2) was then added to this difference spectrum, to give the final spectrum of the 1:1 *p*-cresol:dodecylguanidine complex, given in column 14 (labeled  $\epsilon_{\text{H-bonded}}$ ). This spectrum is also shown graphically in Fig. 3C (red trace) of the main paper.

|                   |                             | 58°C                               | 58°C                              | 60°C                              | 62°C                              | 64°C                              |                              |
|-------------------|-----------------------------|------------------------------------|------------------------------------|------------------------------------|------------------------------------|------------------------------------|------------------------------------|------------------------------------|-----------------------------------|-----------------------------------|-----------------------------------|-----------------------------------|------------------------------|
| $\lambda$<br>(nm) | $\epsilon_{\text{monomer}}$ | $C_{\text{total}} (M)$<br>0.000746 | $C_{\text{total}} (M)$<br>0.000497 | $C_{\text{total}} (M)$<br>0.000332 | $C_{\text{total}} (M)$<br>0.000221 | $C_{\text{total}} (M)$<br>0.000147 | $C_{\text{total}} (M)$<br>0.000098 | $C_{\text{total}} (M)$<br>0.000065 | $C_{\text{total}} (M)$<br>0.00074 | $C_{\text{total}} (M)$<br>0.00074 | $C_{\text{total}} (M)$<br>0.00074 | $C_{\text{total}} (M)$<br>0.00074 | $\epsilon_{\text{H-bonded}}$ |
| 250.0             | 160.6000                    | 0.722246                           | 0.45504                            | 0.222681                           | 0.101007                           | 0.040892                           | 0.022961                           | 0.016261                           | 0.868055                          | 0.84117                           | 0.812859                          | 0.768119                          | 1827.488                     |
| 250.2             | 166.0400                    | 0.708067                           | 0.449738                           | 0.222775                           | 0.100905                           | 0.041592                           | 0.022728                           | 0.017707                           | 0.853143                          | 0.827586                          | 0.797655                          | 0.756117                          | 1805.192                     |
| 250.4             | 171.4800                    | 0.701853                           | 0.443081                           | 0.220369                           | 0.097903                           | 0.040192                           | 0.021995                           | 0.016654                           | 0.847276                          | 0.818775                          | 0.791002                          | 0.747294                          | 1794.77                      |
| 250.6             | 176.2800                    | 0.694681                           | 0.43956                            | 0.216275                           | 0.097642                           | 0.040187                           | 0.021425                           | 0.015842                           | 0.829204                          | 0.809096                          | 0.777322                          | 0.737573                          | 1775.8                       |
| 250.8             | 180.4400                    | 0.682163                           | 0.436196                           | 0.215894                           | 0.097323                           | 0.039775                           | 0.021917                           | 0.017371                           | 0.820825                          | 0.79142                           | 0.76841                           | 0.727209                          | 1757.189                     |
| 251.0             | 184.6000                    | 0.675993                           | 0.429251                           | 0.212213                           | 0.096203                           | 0.037864                           | 0.021009                           | 0.016301                           | 0.80869                           | 0.783445                          | 0.756746                          | 0.715393                          | 1740.162                     |
| 251.2             | 188.7600                    | 0.666663                           | 0.426542                           | 0.211632                           | 0.095084                           | 0.038452                           | 0.020302                           | 0.015831                           | 0.800351                          | 0.776258                          | 0.746496                          | 0.709421                          | 1727.971                     |
| 251.4             | 192.9200                    | 0.655866                           | 0.421768                           | 0.210851                           | 0.094165                           | 0.038741                           | 0.021294                           | 0.01576                            | 0.790965                          | 0.769314                          | 0.738571                          | 0.701616                          | 1714.707                     |
| 251.6             | 197.1200                    | 0.65158                            | 0.416323                           | 0.207056                           | 0.094336                           | 0.037623                           | 0.021182                           | 0.016287                           | 0.778752                          | 0.751367                          | 0.729828                          | 0.691172                          | 1696.514                     |
| 251.8             | 201.3600                    | 0.64651                            | 0.412929                           | 0.206048                           | 0.093099                           | 0.0373                             | 0.019767                           | 0.015812                           | 0.765613                          | 0.740148                          | 0.719423                          | 0.680352                          | 1680.284                     |
| 252.0             | 205.6000                    | 0.634372                           | 0.408597                           | 0.204141                           | 0.092062                           | 0.036877                           | 0.020551                           | 0.015836                           | 0.754915                          | 0.732987                          | 0.705114                          | 0.672175                          | 1663.364                     |
| 252.2             | 210.3200                    | 0.625899                           | 0.403462                           | 0.201574                           | 0.090219                           | 0.036183                           | 0.019689                           | 0.014929                           | 0.746797                          | 0.723549                          | 0.695387                          | 0.664346                          | 1649.875                     |
| 252.4             | 215.0400                    | 0.614642                           | 0.398275                           | 0.199807                           | 0.090176                           | 0.036489                           | 0.018926                           | 0.014922                           | 0.730974                          | 0.713066                          | 0.687729                          | 0.654164                          | 1632.048                     |
| 252.6             | 219.7600                    | 0.607466                           | 0.392222                           | 0.19744                            | 0.090533                           | 0.035595                           | 0.019864                           | 0.014916                           | 0.722267                          | 0.700379                          | 0.678403                          | 0.643475                          | 1616.603                     |
| 252.8             | 224.4800                    | 0.599377                           | 0.389294                           | 0.195773                           | 0.08809                            | 0.035701                           | 0.019301                           | 0.015109                           | 0.710339                          | 0.688095                          | 0.663912                          | 0.632843                          | 1598.358                     |
| 253.0             | 229.2000                    | 0.590197                           | 0.38347                            | 0.193806                           | 0.087047                           | 0.034008                           | 0.017738                           | 0.014502                           | 0.698598                          | 0.678358                          | 0.652419                          | 0.623217                          | 1581.628                     |
| 253.2             | 234.5600                    | 0.579012                           | 0.377868                           | 0.190026                           | 0.086062                           | 0.03392                            | 0.018413                           | 0.014254                           | 0.684828                          | 0.664878                          | 0.643453                          | 0.612101                          | 1562.892                     |
| 253.4             | 239.9200                    | 0.568371                           | 0.37424                            | 0.188547                           | 0.084578                           | 0.034232                           | 0.018388                           | 0.014605                           | 0.670153                          | 0.651734                          | 0.633241                          | 0.601695                          | 1544.598                     |
| 253.6             | 246.1200                    | 0.559678                           | 0.36658                            | 0.185888                           | 0.083507                           | 0.03262                            | 0.01758                            | 0.013502                           | 0.66051                           | 0.640455                          | 0.619509                          | 0.588723                          | 1527.193                     |
| 253.8             | 253.1600                    | 0.547933                           | 0.360524                           | 0.181751                           | 0.082352                           | 0.032285                           | 0.01719                            | 0.012845                           | 0.647846                          | 0.626385                          | 0.607105                          | 0.576493                          | 1508.241                     |
| 254.0             | 260.2000                    | 0.535593                           | 0.35579                            | 0.180714                           | 0.081696                           | 0.031751                           | 0.0168                             | 0.013587                           | 0.627553                          | 0.607574                          | 0.589176                          | 0.559148                          | 1480.862                     |
| 254.2             | 266.1200                    | 0.521262                           | 0.346506                           | 0.176148                           | 0.079887                           | 0.03068                            | 0.01612                            | 0.012602                           | 0.61206                           | 0.594672                          | 0.576936                          | 0.549421                          | 1459.317                     |
| 254.4             | 272.0400                    | 0.512651                           | 0.343153                           | 0.174783                           | 0.078679                           | 0.03071                            | 0.01654                            | 0.012417                           | 0.598931                          | 0.58626                           | 0.565961                          | 0.537942                          | 1444.19                      |
| 254.6             | 278.4000                    | 0.50326                            | 0.336425                           | 0.171671                           | 0.077074                           | 0.029875                           | 0.015417                           | 0.011604                           | 0.590149                          | 0.572312                          | 0.555664                          | 0.529115                          | 1428.97                      |
| 254.8             | 285.2000                    | 0.491046                           | 0.332015                           | 0.169114                           | 0.077571                           | 0.030176                           | 0.01595                            | 0.012262                           | 0.574505                          | 0.556244                          | 0.541982                          | 0.513875                          | 1406.755                     |
| 255.0             | 292.0000                    | 0.48154                            | 0.325342                           | 0.166656                           | 0.074968                           | 0.028576                           | 0.015184                           | 0.01162                            | 0.55779                           | 0.544388                          | 0.526952                          | 0.504832                          | 1387.676                     |
| 255.2             | 298.4000                    | 0.473528                           | 0.320269                           | 0.165531                           | 0.075854                           | 0.029535                           | 0.016257                           | 0.012404                           | 0.547603                          | 0.533845                          | 0.516738                          | 0.494112                          | 1373.991                     |
| 255.4             | 304.8000                    | 0.459453                           | 0.313986                           | 0.162006                           | 0.073439                           | 0.028294                           | 0.01423                            | 0.010088                           | 0.534788                          | 0.520472                          | 0.505187                          | 0.479441                          | 1353.079                     |
| 255.6             | 311.3200                    | 0.451605                           | 0.309715                           | 0.159942                           | 0.072698                           | 0.027836                           | 0.013791                           | 0.011164                           | 0.520862                          | 0.50796                           | 0.492859                          | 0.468416                          | 1336.256                     |
| 255.8             | 317.9600                    | 0.442625                           | 0.30143                            | 0.156337                           | 0.072131                           | 0.02826                            | 0.01454                            | 0.012133                           | 0.507812                          | 0.492296                          | 0.477848                          | 0.457687                          | 1316.323                     |
| 256.0             | 324.6000                    | 0.427889                           | 0.297801                           | 0.154033                           | 0.070763                           | 0.027884                           | 0.014389                           | 0.010701                           | 0.493926                          | 0.481648                          | 0.466409                          | 0.445781                          | 1298.004                     |
| 256.2             | 331.4800                    | 0.419076                           | 0.291777                           | 0.152549                           | 0.069043                           | 0.025472                           | 0.013015                           | 0.010854                           | 0.478841                          | 0.468533                          | 0.45494                           | 0.429717                          | 1278.493                     |
| 256.4             | 338.3600                    | 0.409036                           | 0.283864                           | 0.148464                           | 0.067722                           | 0.026261                           | 0.013541                           | 0.011207                           | 0.467192                          | 0.455694                          | 0.442978                          | 0.417425                          | 1260.675                     |
| 256.6             | 345.4400                    | 0.395006                           | 0.278144                           | 0.146214                           | 0.067558                           | 0.02602                            | 0.013847                           | 0.010146                           | 0.452344                          | 0.440581                          | 0.428492                          | 0.408964                          | 1240.624                     |
| 256.8             | 352.7200                    | 0.385285                           | 0.271178                           | 0.142597                           | 0.065349                           | 0.02455                            | 0.011533                           | 0.009173                           | 0.440806                          | 0.428354                          | 0.413975                          | 0.39872                           | 1223.441                     |
| 257.0             | 360.0000                    | 0.379359                           | 0.26746                            | 0.14128                            | 0.06474                            | 0.02488                            | 0.01292                            | 0.0104                             | 0.425667                          | 0.417289                          | 0.404469                          | 0.385451                          | 1208.679                     |
| 257.2             | 369.9200                    | 0.362032                           | 0.260995                           | 0.138487                           | 0.063648                           | 0.023122                           | 0.012248                           | 0.009355                           | 0.406822                          | 0.399893                          | 0.386258                          | 0.36741                           | 1182.498                     |
| 257.4             | 379.8400                    | 0.350762                           | 0.251786                           | 0.133093                           | 0.060955                           | 0.022664                           | 0.011276                           | 0.00851                            | 0.393119                          | 0.382139                          | 0.371859                          | 0.355839                          | 1163.226                     |
| 257.6             | 389.1200                    | 0.338892                           | 0.247605                           | 0.131512                           | 0.061304                           | 0.022299                           | 0.011866                           | 0.009707                           | 0.381005                          | 0.370129                          | 0.359092                          | 0.344359                          | 1148.513                     |
| 257.8             | 397.7600                    | 0.325971                           | 0.239212                           | 0.127544                           | 0.059195                           | 0.021729                           | 0.01002                            | 0.008846                           | 0.366823                          | 0.358206                          | 0.345783                          | 0.329388                          | 1129.023                     |
| 258.0             | 406.4000                    | 0.320128                           | 0.2338                             | 0.124875                           | 0.057386                           | 0.020759                           | 0.010373                           | 0.008184                           | 0.351294                          | 0.344996                          | 0.333335                          | 0.318319                          | 1113.618                     |



|       |          |          |          |          |          |          |          |          |          |          |          |          |          |
|-------|----------|----------|----------|----------|----------|----------|----------|----------|----------|----------|----------|----------|----------|
| 258.2 | 413.9200 | 0.311142 | 0.230489 | 0.124279 | 0.056724 | 0.019954 | 0.010936 | 0.008895 | 0.339869 | 0.331385 | 0.321802 | 0.308665 | 1099.181 |
| 258.4 | 421.4400 | 0.298197 | 0.22293  | 0.119282 | 0.055462 | 0.020148 | 0.009999 | 0.009106 | 0.329525 | 0.320447 | 0.312115 | 0.297692 | 1083.526 |
| 258.6 | 429.4800 | 0.288095 | 0.217294 | 0.117113 | 0.053185 | 0.018766 | 0.008911 | 0.007084 | 0.316748 | 0.306533 | 0.299792 | 0.283578 | 1065.706 |
| 258.8 | 438.0400 | 0.27811  | 0.212284 | 0.116071 | 0.053693 | 0.019108 | 0.009572 | 0.008027 | 0.30088  | 0.294678 | 0.286039 | 0.27093  | 1048.586 |
| 259.0 | 446.6000 | 0.267855 | 0.20435  | 0.111129 | 0.052701 | 0.01825  | 0.008833 | 0.007971 | 0.287273 | 0.28199  | 0.272667 | 0.2621   | 1032.191 |
| 259.2 | 456.3600 | 0.258599 | 0.199769 | 0.108588 | 0.049844 | 0.017015 | 0.008977 | 0.006837 | 0.277749 | 0.269721 | 0.263509 | 0.251546 | 1021.065 |
| 259.4 | 466.1200 | 0.245642 | 0.194872 | 0.107248 | 0.048487 | 0.01648  | 0.00842  | 0.006402 | 0.264064 | 0.257826 | 0.250797 | 0.237339 | 1004.59  |
| 259.6 | 476.4000 | 0.237002 | 0.187429 | 0.103235 | 0.047916 | 0.016069 | 0.006813 | 0.006434 | 0.25137  | 0.244093 | 0.237878 | 0.225288 | 989.6854 |
| 259.8 | 487.2000 | 0.226821 | 0.181589 | 0.10105  | 0.046429 | 0.014282 | 0.007354 | 0.006932 | 0.238137 | 0.233217 | 0.224222 | 0.214604 | 976.4153 |
| 260.0 | 498.0000 | 0.216267 | 0.176164 | 0.097364 | 0.044242 | 0.014694 | 0.007096 | 0.00553  | 0.226381 | 0.221432 | 0.215696 | 0.206089 | 965.9003 |
| 260.2 | 513.0400 | 0.208209 | 0.170071 | 0.095771 | 0.044818 | 0.015283 | 0.006722 | 0.006352 | 0.211358 | 0.208162 | 0.201145 | 0.190601 | 954.0591 |
| 260.4 | 528.0800 | 0.194797 | 0.163513 | 0.092677 | 0.041994 | 0.012972 | 0.006248 | 0.005775 | 0.196954 | 0.193071 | 0.187121 | 0.175685 | 939.6555 |
| 260.6 | 541.6400 | 0.182607 | 0.156373 | 0.087676 | 0.041198 | 0.011979 | 0.004519 | 0.004493 | 0.182879 | 0.179539 | 0.173276 | 0.164955 | 926.3208 |
| 260.8 | 553.7200 | 0.175605 | 0.152279 | 0.086665 | 0.041028 | 0.011103 | 0.005735 | 0.005308 | 0.172511 | 0.166861 | 0.162516 | 0.153284 | 917.3128 |
| 261.0 | 565.8000 | 0.163882 | 0.145069 | 0.081954 | 0.037558 | 0.010727 | 0.004452 | 0.004423 | 0.159694 | 0.157381 | 0.152731 | 0.143689 | 906.6232 |
| 261.2 | 575.7200 | 0.156384 | 0.142093 | 0.081661 | 0.037966 | 0.010469 | 0.004279 | 0.004878 | 0.149543 | 0.147177 | 0.141409 | 0.133289 | 896.9541 |
| 261.4 | 585.6400 | 0.148721 | 0.13888  | 0.080368 | 0.037174 | 0.010611 | 0.004107 | 0.004233 | 0.140028 | 0.135607 | 0.132381 | 0.125083 | 888.3731 |
| 261.6 | 596.6400 | 0.139565 | 0.130357 | 0.075416 | 0.034443 | 0.009194 | 0.004029 | 0.004418 | 0.129101 | 0.123581 | 0.121556 | 0.114307 | 876.1689 |
| 261.8 | 608.7200 | 0.126712 | 0.125463 | 0.073205 | 0.031873 | 0.007518 | 0.001145 | 0.002733 | 0.117233 | 0.114487 | 0.110597 | 0.102821 | 865.2687 |
| 262.0 | 620.8000 | 0.121946 | 0.123134 | 0.072194 | 0.033003 | 0.008242 | 0.002262 | 0.002748 | 0.105151 | 0.104497 | 0.098432 | 0.092476 | 857.8801 |
| 262.2 | 634.6400 | 0.113049 | 0.114092 | 0.0665   | 0.030445 | 0.006108 | 0.001805 | 0.002748 | 0.094098 | 0.093496 | 0.088871 | 0.08332  | 849.8057 |
| 262.4 | 648.4800 | 0.099535 | 0.110311 | 0.065405 | 0.028986 | 0.005873 | 0.000749 | 0.002749 | 0.086107 | 0.079603 | 0.079445 | 0.072052 | 841.3427 |
| 262.6 | 662.6000 | 0.093136 | 0.105421 | 0.063617 | 0.028265 | 0.005298 | 0.001065 | 0.001931 | 0.073209 | 0.069925 | 0.067899 | 0.061509 | 834.5168 |
| 262.8 | 677.0000 | 0.086648 | 0.099984 | 0.059736 | 0.026583 | 0.003381 | -0.00015 | 0.001295 | 0.063718 | 0.059798 | 0.056514 | 0.053332 | 829.5589 |
| 263.0 | 691.4000 | 0.075194 | 0.095668 | 0.058455 | 0.026301 | 0.003664 | -5.7E-05 | 0.001459 | 0.052789 | 0.052261 | 0.049357 | 0.044481 | 825.4216 |
| 263.2 | 706.0400 | 0.070719 | 0.091126 | 0.055895 | 0.025265 | 0.004612 | -9.2E-05 | 0.001907 | 0.043944 | 0.043416 | 0.040405 | 0.033709 | 822.6967 |
| 263.4 | 720.6800 | 0.061181 | 0.087705 | 0.053734 | 0.02353  | 0.00216  | -0.00173 | 0.000556 | 0.035437 | 0.0322   | 0.028937 | 0.024888 | 817.2265 |
| 263.6 | 735.0800 | 0.052077 | 0.0836   | 0.052153 | 0.020747 | 0.001443 | -0.00264 | 0.00042  | 0.023201 | 0.021512 | 0.019078 | 0.017094 | 811.3009 |
| 263.8 | 749.2400 | 0.047639 | 0.079621 | 0.050452 | 0.023018 | 0.001362 | -0.00143 | 0.000899 | 0.014551 | 0.01336  | 0.010613 | 0.005698 | 808.8477 |
| 264.0 | 763.4000 | 0.034687 | 0.07322  | 0.046351 | 0.019289 | 0.00018  | -0.00281 | -0.00112 | 0.001992 | 0.001553 | 0.001166 | -0.00425 | 799.1862 |
| 264.2 | 771.8800 | 0.027646 | 0.067687 | 0.043136 | 0.018315 | 0.000334 | -0.00344 | -0.00047 | -0.00337 | -0.00341 | -0.0066  | -0.00965 | 794.4193 |
| 264.4 | 780.3600 | 0.025198 | 0.06679  | 0.04342  | 0.01914  | -0.00071 | -0.00318 | 0.000477 | -0.01042 | -0.01354 | -0.01511 | -0.01689 | 789.1572 |
| 264.6 | 789.6800 | 0.016159 | 0.062955 | 0.040926 | 0.015581 | -0.00138 | -0.00469 | -0.00173 | -0.02071 | -0.02114 | -0.02249 | -0.02389 | 781.2817 |
| 264.8 | 799.8400 | 0.009729 | 0.055856 | 0.037953 | 0.015735 | -0.00248 | -0.00348 | -0.00109 | -0.02623 | -0.02828 | -0.02778 | -0.03408 | 776.4231 |
| 265.0 | 810.0000 | 0.005201 | 0.054208 | 0.03688  | 0.01469  | -0.00247 | -0.00418 | -0.00145 | -0.03368 | -0.035   | -0.03594 | -0.03895 | 773.8384 |
| 265.2 | 824.3200 | -0.00355 | 0.048504 | 0.033626 | 0.013025 | -0.00288 | -0.00528 | -0.00158 | -0.04509 | -0.0428  | -0.04585 | -0.04805 | 768.4447 |
| 265.4 | 838.6400 | -0.0112  | 0.045015 | 0.030472 | 0.012161 | -0.00518 | -0.00539 | -0.00291 | -0.05429 | -0.05162 | -0.05446 | -0.05339 | 766.3072 |
| 265.6 | 854.1200 | -0.01712 | 0.040928 | 0.029932 | 0.011539 | -0.00416 | -0.0062  | -0.00172 | -0.05885 | -0.06268 | -0.06174 | -0.06569 | 765.2204 |
| 265.8 | 870.7600 | -0.02638 | 0.036546 | 0.027608 | 0.009162 | -0.0058  | -0.00593 | -0.0026  | -0.06832 | -0.07069 | -0.07048 | -0.07207 | 764.4566 |
| 266.0 | 887.4000 | -0.03065 | 0.033371 | 0.024783 | 0.008485 | -0.00755 | -0.00707 | -0.00428 | -0.07681 | -0.07683 | -0.07769 | -0.07862 | 767.3765 |
| 266.2 | 905.0800 | -0.0367  | 0.029198 | 0.023713 | 0.008377 | -0.00705 | -0.0077  | -0.00343 | -0.08568 | -0.08409 | -0.08493 | -0.0855  | 770.1293 |
| 266.4 | 922.7600 | -0.04386 | 0.02359  | 0.020344 | 0.00597  | -0.00855 | -0.00773 | -0.00358 | -0.09464 | -0.09277 | -0.09347 | -0.09643 | 769.0982 |
| 266.6 | 940.7600 | -0.05232 | 0.021103 | 0.019468 | 0.004792 | -0.00939 | -0.00919 | -0.00375 | -0.0999  | -0.10384 | -0.10502 | -0.10515 | 769.2274 |

|       |           |          |          |          |          |          |          |          |          |          |          |          |          |
|-------|-----------|----------|----------|----------|----------|----------|----------|----------|----------|----------|----------|----------|----------|
| 266.8 | 959.0800  | -0.05875 | 0.018489 | 0.017785 | 0.003943 | -0.00948 | -0.01019 | -0.00564 | -0.1107  | -0.11188 | -0.10985 | -0.11174 | 772.5816 |
| 267.0 | 977.4000  | -0.07104 | 0.01115  | 0.013203 | 0.001295 | -0.01168 | -0.00989 | -0.00613 | -0.11967 | -0.11825 | -0.11755 | -0.1208  | 771.7176 |
| 267.2 | 991.3200  | -0.07132 | 0.007902 | 0.011682 | 0.001018 | -0.01182 | -0.01115 | -0.00544 | -0.12641 | -0.1243  | -0.12608 | -0.12822 | 773.5086 |
| 267.4 | 1005.2400 | -0.07624 | 0.003347 | 0.00906  | 0.001142 | -0.01267 | -0.01071 | -0.00644 | -0.13287 | -0.13436 | -0.13447 | -0.1332  | 772.719  |
| 267.6 | 1021.5200 | -0.08671 | 0.001851 | 0.007555 | -0.00236 | -0.01316 | -0.01131 | -0.0066  | -0.13893 | -0.14145 | -0.13957 | -0.13952 | 775.0283 |
| 267.8 | 1040.1600 | -0.0939  | -0.00189 | 0.005867 | -0.00308 | -0.0145  | -0.01304 | -0.00681 | -0.14734 | -0.14786 | -0.14632 | -0.14883 | 778.0438 |
| 268.0 | 1058.8000 | -0.09834 | -0.00824 | 0.002278 | -0.00249 | -0.01584 | -0.01196 | -0.00692 | -0.15676 | -0.15498 | -0.15583 | -0.1575  | 779.8408 |
| 268.2 | 1082.9600 | -0.11278 | -0.01336 | 0.000457 | -0.00703 | -0.0163  | -0.01323 | -0.00819 | -0.16761 | -0.16525 | -0.16622 | -0.16838 | 780.7979 |
| 268.4 | 1107.1200 | -0.11689 | -0.01813 | -0.00356 | -0.00757 | -0.01785 | -0.0159  | -0.00836 | -0.17518 | -0.17755 | -0.17815 | -0.17537 | 786.7845 |
| 268.6 | 1131.7600 | -0.12461 | -0.02034 | -0.00564 | -0.00762 | -0.01867 | -0.01491 | -0.00846 | -0.18257 | -0.18446 | -0.18156 | -0.18214 | 798.4473 |
| 268.8 | 1156.8800 | -0.13417 | -0.0226  | -0.00578 | -0.00967 | -0.01836 | -0.01407 | -0.0085  | -0.18703 | -0.18893 | -0.19127 | -0.18982 | 809.4775 |
| 269.0 | 1182.0000 | -0.13831 | -0.02806 | -0.00892 | -0.01042 | -0.02115 | -0.01634 | -0.01023 | -0.19718 | -0.19907 | -0.19661 | -0.19981 | 817.5177 |
| 269.2 | 1201.0400 | -0.13828 | -0.02935 | -0.01065 | -0.01083 | -0.02085 | -0.0165  | -0.01007 | -0.2061  | -0.20379 | -0.20315 | -0.20265 | 827.0454 |
| 269.4 | 1220.0800 | -0.14745 | -0.03023 | -0.01107 | -0.01234 | -0.02095 | -0.01697 | -0.01051 | -0.21186 | -0.20768 | -0.20768 | -0.20799 | 834.9448 |
| 269.6 | 1235.8800 | -0.14887 | -0.03611 | -0.01431 | -0.01293 | -0.02147 | -0.01792 | -0.01043 | -0.21145 | -0.21213 | -0.21295 | -0.20997 | 844.1297 |
| 269.8 | 1248.4400 | -0.15463 | -0.03497 | -0.01378 | -0.01361 | -0.02242 | -0.01815 | -0.01065 | -0.21266 | -0.21886 | -0.21646 | -0.21578 | 848.283  |
| 270.0 | 1261.0000 | -0.15903 | -0.03709 | -0.01385 | -0.01478 | -0.02387 | -0.01758 | -0.01107 | -0.22271 | -0.22456 | -0.21903 | -0.22154 | 849.2893 |
| 270.2 | 1263.8000 | -0.15542 | -0.0394  | -0.01698 | -0.0149  | -0.02368 | -0.01875 | -0.01195 | -0.22454 | -0.22161 | -0.22125 | -0.22452 | 850.9074 |
| 270.4 | 1266.6000 | -0.16204 | -0.03799 | -0.01671 | -0.01402 | -0.02279 | -0.01843 | -0.01133 | -0.22294 | -0.22161 | -0.22537 | -0.22305 | 851.4368 |
| 270.6 | 1272.2800 | -0.16413 | -0.04662 | -0.0209  | -0.01777 | -0.02403 | -0.01978 | -0.0117  | -0.22591 | -0.23016 | -0.22717 | -0.22589 | 847.3191 |
| 270.8 | 1280.8400 | -0.16835 | -0.04546 | -0.02064 | -0.01827 | -0.02568 | -0.01992 | -0.01265 | -0.23182 | -0.23482 | -0.23046 | -0.23273 | 846.594  |
| 271.0 | 1289.4000 | -0.17865 | -0.05216 | -0.02338 | -0.01966 | -0.02824 | -0.02106 | -0.01341 | -0.23903 | -0.23802 | -0.23424 | -0.23837 | 841.7843 |
| 271.2 | 1302.6000 | -0.1784  | -0.05302 | -0.02466 | -0.02137 | -0.02668 | -0.01985 | -0.01227 | -0.24549 | -0.24301 | -0.24543 | -0.24167 | 844.649  |
| 271.4 | 1315.8000 | -0.18099 | -0.05594 | -0.02685 | -0.02199 | -0.02742 | -0.02145 | -0.01393 | -0.24953 | -0.24796 | -0.2471  | -0.24883 | 849.0508 |
| 271.6 | 1331.4800 | -0.18837 | -0.05791 | -0.02825 | -0.02036 | -0.02853 | -0.02129 | -0.01435 | -0.25259 | -0.25837 | -0.2511  | -0.25662 | 851.8542 |
| 271.8 | 1349.6400 | -0.18975 | -0.05731 | -0.02828 | -0.02347 | -0.0284  | -0.02186 | -0.01313 | -0.25805 | -0.25969 | -0.25567 | -0.25659 | 865.0121 |
| 272.0 | 1367.8000 | -0.19377 | -0.05933 | -0.02901 | -0.02448 | -0.02927 | -0.02224 | -0.01281 | -0.26177 | -0.2622  | -0.26326 | -0.26236 | 873.6156 |
| 272.2 | 1381.9600 | -0.19947 | -0.06205 | -0.03101 | -0.02271 | -0.02965 | -0.02263 | -0.01503 | -0.26543 | -0.26377 | -0.2635  | -0.26097 | 883.2764 |
| 272.4 | 1396.1200 | -0.19771 | -0.06182 | -0.02981 | -0.02444 | -0.02883 | -0.02262 | -0.01395 | -0.26836 | -0.26853 | -0.26596 | -0.26888 | 891.2986 |
| 272.6 | 1407.9200 | -0.19572 | -0.06038 | -0.03173 | -0.02425 | -0.03096 | -0.02208 | -0.01491 | -0.26617 | -0.26897 | -0.26635 | -0.26994 | 904.0069 |
| 272.8 | 1417.3600 | -0.20584 | -0.06623 | -0.03336 | -0.02434 | -0.03035 | -0.0242  | -0.01543 | -0.26716 | -0.26776 | -0.2686  | -0.26586 | 909.0308 |
| 273.0 | 1426.8000 | -0.20097 | -0.0625  | -0.0309  | -0.02582 | -0.02974 | -0.02283 | -0.01494 | -0.27082 | -0.27085 | -0.27302 | -0.26992 | 915.4241 |
| 273.2 | 1431.3600 | -0.20047 | -0.0661  | -0.03251 | -0.02573 | -0.03241 | -0.02357 | -0.01564 | -0.2713  | -0.27561 | -0.27293 | -0.27094 | 916.6355 |
| 273.4 | 1435.9200 | -0.20414 | -0.06785 | -0.03273 | -0.02474 | -0.03088 | -0.02372 | -0.01573 | -0.27495 | -0.27278 | -0.27161 | -0.27371 | 918.7193 |
| 273.6 | 1442.4800 | -0.20701 | -0.06656 | -0.0353  | -0.02769 | -0.03264 | -0.02346 | -0.01636 | -0.27603 | -0.27828 | -0.2767  | -0.27387 | 919.387  |
| 273.8 | 1451.0400 | -0.21243 | -0.07357 | -0.03855 | -0.02778 | -0.0323  | -0.0249  | -0.01572 | -0.28012 | -0.28185 | -0.27731 | -0.27459 | 920.4953 |
| 274.0 | 1459.6000 | -0.22011 | -0.07284 | -0.03619 | -0.02737 | -0.03256 | -0.02534 | -0.01537 | -0.27923 | -0.28417 | -0.28206 | -0.28385 | 921.0458 |
| 274.2 | 1476.9600 | -0.21778 | -0.074   | -0.03715 | -0.03111 | -0.03571 | -0.02564 | -0.0176  | -0.2883  | -0.28762 | -0.28987 | -0.29023 | 928.1266 |
| 274.4 | 1494.3200 | -0.22582 | -0.0812  | -0.04001 | -0.03094 | -0.03557 | -0.02714 | -0.01773 | -0.29395 | -0.29363 | -0.29235 | -0.2926  | 934.1936 |
| 274.6 | 1514.6400 | -0.23546 | -0.08052 | -0.04346 | -0.03154 | -0.03705 | -0.02693 | -0.01725 | -0.29941 | -0.29787 | -0.29846 | -0.29861 | 942.3605 |
| 274.8 | 1537.9200 | -0.23039 | -0.08497 | -0.04449 | -0.03308 | -0.03557 | -0.02612 | -0.01656 | -0.30406 | -0.30686 | -0.30459 | -0.30842 | 954.9301 |
| 275.0 | 1561.2000 | -0.24273 | -0.08738 | -0.04542 | -0.03383 | -0.037   | -0.0295  | -0.01848 | -0.30964 | -0.31195 | -0.31516 | -0.31006 | 964.1116 |
| 275.2 | 1578.0000 | -0.24202 | -0.08466 | -0.0442  | -0.03314 | -0.03797 | -0.02844 | -0.01817 | -0.30516 | -0.30738 | -0.30828 | -0.30865 | 988.7151 |

|       |           |          |          |          |          |          |          |          |          |          |          |          |          |
|-------|-----------|----------|----------|----------|----------|----------|----------|----------|----------|----------|----------|----------|----------|
| 275.4 | 1594.8000 | -0.24218 | -0.08975 | -0.04627 | -0.03515 | -0.03714 | -0.02749 | -0.01766 | -0.31186 | -0.3131  | -0.3087  | -0.31348 | 997.0989 |
| 275.6 | 1607.3600 | -0.24374 | -0.08601 | -0.04514 | -0.03353 | -0.03828 | -0.02962 | -0.01978 | -0.31498 | -0.31666 | -0.30997 | -0.31615 | 1005.945 |
| 275.8 | 1615.6800 | -0.23753 | -0.08213 | -0.04711 | -0.03217 | -0.0388  | -0.02814 | -0.01892 | -0.31451 | -0.31411 | -0.31669 | -0.31726 | 1015.422 |
| 276.0 | 1624.0000 | -0.23925 | -0.09026 | -0.04757 | -0.0349  | -0.03623 | -0.02785 | -0.01786 | -0.30962 | -0.31365 | -0.31632 | -0.31323 | 1024.968 |
| 276.2 | 1625.8400 | -0.24517 | -0.08378 | -0.04628 | -0.03471 | -0.0383  | -0.02963 | -0.01898 | -0.30863 | -0.31038 | -0.31142 | -0.30984 | 1031.017 |
| 276.4 | 1627.6800 | -0.23985 | -0.08766 | -0.04759 | -0.03522 | -0.03837 | -0.02881 | -0.0192  | -0.31411 | -0.31483 | -0.31269 | -0.31512 | 1027.297 |
| 276.6 | 1632.5600 | -0.23824 | -0.08904 | -0.04821 | -0.0364  | -0.03929 | -0.02999 | -0.01882 | -0.3177  | -0.31749 | -0.31319 | -0.31976 | 1027.848 |
| 276.8 | 1640.4800 | -0.25098 | -0.0885  | -0.05314 | -0.03765 | -0.04085 | -0.03027 | -0.01993 | -0.31793 | -0.31839 | -0.31941 | -0.32026 | 1027.636 |
| 277.0 | 1648.4000 | -0.24731 | -0.09812 | -0.05397 | -0.0372  | -0.03901 | -0.02964 | -0.01975 | -0.31419 | -0.3181  | -0.32013 | -0.3209  | 1035.809 |
| 277.2 | 1666.9600 | -0.25246 | -0.09623 | -0.05403 | -0.0417  | -0.04314 | -0.03216 | -0.02095 | -0.32638 | -0.32881 | -0.32851 | -0.32978 | 1036.882 |
| 277.4 | 1685.5200 | -0.26488 | -0.10187 | -0.05739 | -0.0405  | -0.04277 | -0.03248 | -0.02146 | -0.33377 | -0.33762 | -0.33271 | -0.33595 | 1039.129 |
| 277.6 | 1708.3200 | -0.26248 | -0.104   | -0.05716 | -0.04064 | -0.04202 | -0.03232 | -0.02234 | -0.34015 | -0.34055 | -0.33363 | -0.33798 | 1057.501 |
| 277.8 | 1735.3600 | -0.26802 | -0.10735 | -0.05714 | -0.04411 | -0.0447  | -0.03287 | -0.0213  | -0.34536 | -0.34186 | -0.34428 | -0.34717 | 1071.477 |
| 278.0 | 1762.4000 | -0.28148 | -0.10928 | -0.06302 | -0.04329 | -0.04397 | -0.03402 | -0.02176 | -0.34385 | -0.34983 | -0.35565 | -0.3545  | 1083.111 |
| 278.2 | 1781.2800 | -0.2709  | -0.10201 | -0.05628 | -0.04086 | -0.04275 | -0.03377 | -0.02128 | -0.34799 | -0.34955 | -0.34793 | -0.34426 | 1113.515 |
| 278.4 | 1800.1600 | -0.27347 | -0.10085 | -0.05565 | -0.04264 | -0.04342 | -0.03242 | -0.02251 | -0.34799 | -0.35121 | -0.3432  | -0.35277 | 1129.739 |
| 278.6 | 1805.4800 | -0.27782 | -0.10552 | -0.05632 | -0.04111 | -0.04381 | -0.03244 | -0.02256 | -0.34778 | -0.34498 | -0.33581 | -0.34558 | 1140.464 |
| 278.8 | 1797.2400 | -0.25296 | -0.0916  | -0.05188 | -0.03689 | -0.04339 | -0.03293 | -0.02102 | -0.33113 | -0.33211 | -0.33744 | -0.33766 | 1159.04  |
| 279.0 | 1789.0000 | -0.24545 | -0.08613 | -0.05295 | -0.03727 | -0.03978 | -0.03002 | -0.02059 | -0.32309 | -0.32669 | -0.33289 | -0.32599 | 1166.119 |
| 279.2 | 1739.8800 | -0.23191 | -0.07668 | -0.03974 | -0.03011 | -0.03426 | -0.02741 | -0.01829 | -0.28498 | -0.29943 | -0.29813 | -0.30443 | 1173.549 |
| 279.4 | 1690.7600 | -0.20745 | -0.06179 | -0.03073 | -0.02366 | -0.03344 | -0.02689 | -0.0173  | -0.27436 | -0.27533 | -0.27324 | -0.28066 | 1169.947 |
| 279.6 | 1640.9600 | -0.20819 | -0.06697 | -0.0314  | -0.02715 | -0.03172 | -0.02501 | -0.01736 | -0.26762 | -0.26821 | -0.27589 | -0.27484 | 1125.176 |
| 279.8 | 1590.4800 | -0.18976 | -0.05425 | -0.02794 | -0.0216  | -0.0315  | -0.02437 | -0.01598 | -0.25162 | -0.25478 | -0.25933 | -0.25906 | 1108.735 |
| 280.0 | 1540.0000 | -0.17082 | -0.04641 | -0.02538 | -0.01954 | -0.02748 | -0.02172 | -0.0138  | -0.23388 | -0.23777 | -0.24022 | -0.24371 | 1094.157 |
| 280.2 | 1489.7600 | -0.16874 | -0.04599 | -0.0212  | -0.01844 | -0.02629 | -0.0206  | -0.01273 | -0.21921 | -0.22256 | -0.229   | -0.23209 | 1065.869 |
| 280.4 | 1439.5200 | -0.15126 | -0.03426 | -0.01542 | -0.01703 | -0.02581 | -0.02187 | -0.01487 | -0.20768 | -0.21052 | -0.21045 | -0.21486 | 1047.98  |
| 280.6 | 1397.0000 | -0.13895 | -0.03028 | -0.0163  | -0.01334 | -0.02366 | -0.01991 | -0.01361 | -0.19703 | -0.20113 | -0.1992  | -0.19848 | 1029.253 |
| 280.8 | 1362.2000 | -0.13269 | -0.02677 | -0.01135 | -0.01405 | -0.02434 | -0.0179  | -0.01204 | -0.18267 | -0.18648 | -0.18904 | -0.19246 | 1015.724 |
| 281.0 | 1327.4000 | -0.12279 | -0.0209  | -0.0084  | -0.01256 | -0.02193 | -0.01949 | -0.01258 | -0.16905 | -0.17244 | -0.17607 | -0.18409 | 1005.284 |
| 281.2 | 1303.4800 | -0.1134  | -0.02186 | -0.01066 | -0.01197 | -0.02091 | -0.01754 | -0.01173 | -0.16751 | -0.16825 | -0.17609 | -0.17531 | 989.7903 |
| 281.4 | 1279.5600 | -0.11207 | -0.01716 | -0.00731 | -0.01248 | -0.0224  | -0.0171  | -0.01157 | -0.16256 | -0.16381 | -0.16378 | -0.16681 | 979.3003 |
| 281.6 | 1259.6400 | -0.10542 | -0.01256 | -0.0071  | -0.01078 | -0.02027 | -0.01784 | -0.01118 | -0.15334 | -0.15864 | -0.15803 | -0.16048 | 973.2341 |
| 281.8 | 1243.7200 | -0.09648 | -0.0134  | -0.00352 | -0.00826 | -0.01993 | -0.01608 | -0.01154 | -0.14642 | -0.14938 | -0.1541  | -0.16117 | 968.6101 |
| 282.0 | 1227.8000 | -0.0944  | -0.00596 | -0.00203 | -0.00864 | -0.01879 | -0.01612 | -0.00991 | -0.13997 | -0.14302 | -0.14801 | -0.15077 | 966.5655 |
| 282.2 | 1220.2000 | -0.09155 | -0.0083  | -0.00651 | -0.00966 | -0.01977 | -0.01658 | -0.01101 | -0.13887 | -0.14156 | -0.14663 | -0.14644 | 961.9122 |
| 282.4 | 1212.6000 | -0.08977 | -0.01129 | -0.00478 | -0.00908 | -0.02045 | -0.01713 | -0.01152 | -0.13672 | -0.14076 | -0.14234 | -0.14482 | 957.8873 |
| 282.6 | 1210.4800 | -0.09554 | -0.00844 | -0.00638 | -0.01022 | -0.02034 | -0.01773 | -0.01108 | -0.1385  | -0.14527 | -0.14642 | -0.15103 | 947.7782 |
| 282.8 | 1213.8400 | -0.09482 | -0.01496 | -0.00709 | -0.01176 | -0.02303 | -0.01796 | -0.0119  | -0.1384  | -0.1425  | -0.14601 | -0.15107 | 950.9065 |
| 283.0 | 1217.2000 | -0.08997 | -0.01024 | -0.00611 | -0.0117  | -0.02073 | -0.01649 | -0.01142 | -0.14021 | -0.14372 | -0.14554 | -0.14921 | 956.9273 |
| 283.2 | 1236.0000 | -0.10865 | -0.01715 | -0.01255 | -0.01466 | -0.02249 | -0.01843 | -0.01284 | -0.14867 | -0.1509  | -0.15114 | -0.15991 | 954.1828 |
| 283.4 | 1254.8000 | -0.10916 | -0.02158 | -0.01099 | -0.01501 | -0.02336 | -0.01917 | -0.01196 | -0.15138 | -0.15753 | -0.16267 | -0.16539 | 961.8251 |
| 283.6 | 1282.0000 | -0.11371 | -0.02236 | -0.01192 | -0.01632 | -0.02405 | -0.02044 | -0.01283 | -0.16014 | -0.16482 | -0.17163 | -0.17252 | 974.5391 |
| 283.8 | 1317.6000 | -0.12619 | -0.03031 | -0.01874 | -0.01759 | -0.02719 | -0.02102 | -0.01484 | -0.17023 | -0.1767  | -0.17914 | -0.18143 | 988.0026 |

|       |           |          |          |          |          |          |          |          |          |          |          |          |          |
|-------|-----------|----------|----------|----------|----------|----------|----------|----------|----------|----------|----------|----------|----------|
| 284.0 | 1353.2000 | -0.13191 | -0.03238 | -0.02016 | -0.01846 | -0.02792 | -0.02111 | -0.01486 | -0.18293 | -0.18454 | -0.18663 | -0.19208 | 1005.876 |
| 284.2 | 1398.1600 | -0.14238 | -0.03554 | -0.02279 | -0.01989 | -0.02743 | -0.02262 | -0.01408 | -0.18791 | -0.19277 | -0.19911 | -0.20673 | 1030.639 |
| 284.4 | 1443.1200 | -0.15554 | -0.04026 | -0.02222 | -0.02203 | -0.02854 | -0.02173 | -0.0151  | -0.19649 | -0.20464 | -0.21187 | -0.21496 | 1053.758 |
| 284.6 | 1481.3600 | -0.15357 | -0.04173 | -0.02221 | -0.02058 | -0.02946 | -0.02267 | -0.01649 | -0.20387 | -0.21036 | -0.21662 | -0.214   | 1085.682 |
| 284.8 | 1512.8800 | -0.16238 | -0.03927 | -0.02428 | -0.02135 | -0.02989 | -0.02386 | -0.01564 | -0.20458 | -0.21256 | -0.21344 | -0.22213 | 1111.409 |
| 285.0 | 1544.4000 | -0.1674  | -0.04546 | -0.02494 | -0.02391 | -0.03143 | -0.02395 | -0.01669 | -0.21085 | -0.21265 | -0.22307 | -0.23091 | 1129.986 |
| 285.2 | 1537.8400 | -0.13945 | -0.02859 | -0.01586 | -0.01596 | -0.02676 | -0.02171 | -0.01576 | -0.19584 | -0.1958  | -0.20208 | -0.21424 | 1165.729 |
| 285.4 | 1531.2800 | -0.12554 | -0.02677 | -0.01598 | -0.01231 | -0.0269  | -0.02067 | -0.01443 | -0.1784  | -0.18871 | -0.19461 | -0.19792 | 1183.42  |
| 285.6 | 1495.5600 | -0.11813 | -0.01465 | -0.00363 | -0.01002 | -0.02045 | -0.01736 | -0.01151 | -0.15766 | -0.17139 | -0.17494 | -0.17906 | 1184.639 |
| 285.8 | 1430.6800 | -0.09241 | 0.00262  | 0.001814 | -0.00348 | -0.01981 | -0.01651 | -0.01199 | -0.13537 | -0.14217 | -0.14799 | -0.15471 | 1173.553 |
| 286.0 | 1365.8000 | -0.07598 | 0.009606 | 0.011554 | 0.001258 | -0.01417 | -0.01275 | -0.00918 | -0.11082 | -0.11695 | -0.12296 | -0.13651 | 1153.917 |
| 286.2 | 1289.7200 | -0.04338 | 0.029083 | 0.020613 | 0.008172 | -0.00909 | -0.00959 | -0.00663 | -0.08348 | -0.08816 | -0.09815 | -0.11019 | 1137.046 |
| 286.4 | 1213.6400 | -0.02651 | 0.037868 | 0.023572 | 0.011786 | -0.00751 | -0.00834 | -0.00619 | -0.05635 | -0.0726  | -0.07738 | -0.08396 | 1104.204 |
| 286.6 | 1137.5600 | -0.01474 | 0.046469 | 0.03083  | 0.013799 | -0.00302 | -0.00578 | -0.00344 | -0.039   | -0.05289 | -0.0572  | -0.05979 | 1066.8   |
| 286.8 | 1061.4800 | 0.007656 | 0.055838 | 0.035989 | 0.017513 | -0.00204 | -0.00403 | -0.0026  | -0.02179 | -0.02717 | -0.03293 | -0.04445 | 1033.646 |
| 287.0 | 985.4000  | 0.030489 | 0.066029 | 0.042247 | 0.022727 | 0.000846 | -0.00327 | -0.00225 | 0.002575 | -0.00122 | -0.00758 | -0.02131 | 1007.353 |
| 287.2 | 913.0800  | 0.044071 | 0.075351 | 0.047957 | 0.023909 | 0.003877 | 0.000418 | -0.00135 | 0.024813 | 0.014935 | 0.009591 | 0.000111 | 972.6449 |
| 287.4 | 840.7600  | 0.061904 | 0.083337 | 0.051268 | 0.027292 | 0.005308 | 0.001506 | 0.001251 | 0.045359 | 0.032706 | 0.025266 | 0.021183 | 938.151  |
| 287.6 | 775.4000  | 0.078845 | 0.088482 | 0.055067 | 0.028737 | 0.007516 | 0.001311 | 0.002399 | 0.061981 | 0.049864 | 0.043227 | 0.036275 | 906.4343 |
| 287.8 | 717.0000  | 0.090394 | 0.098791 | 0.060856 | 0.031043 | 0.010001 | 0.003834 | 0.002495 | 0.074752 | 0.069247 | 0.06361  | 0.052945 | 882.1    |
| 288.0 | 658.6000  | 0.108632 | 0.107539 | 0.064345 | 0.034549 | 0.011386 | 0.005457 | 0.004091 | 0.094536 | 0.088036 | 0.080943 | 0.071626 | 861.7146 |
| 288.2 | 609.8800  | 0.118397 | 0.107558 | 0.06612  | 0.034417 | 0.010948 | 0.005032 | 0.004258 | 0.106266 | 0.098802 | 0.089204 | 0.082287 | 832.6769 |
| 288.4 | 561.1600  | 0.12751  | 0.115697 | 0.068495 | 0.035684 | 0.012209 | 0.005806 | 0.004125 | 0.120226 | 0.10895  | 0.101767 | 0.095917 | 808.8618 |
| 288.6 | 512.5200  | 0.145287 | 0.122759 | 0.072643 | 0.038733 | 0.01516  | 0.007273 | 0.004886 | 0.137262 | 0.127098 | 0.120505 | 0.110254 | 795.3635 |
| 288.8 | 463.9600  | 0.150943 | 0.123754 | 0.074265 | 0.038665 | 0.013698 | 0.007032 | 0.004943 | 0.143282 | 0.137444 | 0.127511 | 0.120622 | 762.1458 |
| 289.0 | 415.4000  | 0.170025 | 0.1353   | 0.079687 | 0.042797 | 0.018436 | 0.010391 | 0.006799 | 0.165161 | 0.156085 | 0.14844  | 0.13958  | 755.2166 |
| 289.2 | 384.7600  | 0.17582  | 0.137471 | 0.08136  | 0.042968 | 0.01804  | 0.009194 | 0.006491 | 0.172645 | 0.163645 | 0.154771 | 0.146108 | 738.0955 |
| 289.4 | 354.1200  | 0.185253 | 0.143697 | 0.084432 | 0.045139 | 0.018644 | 0.009896 | 0.007582 | 0.184282 | 0.173568 | 0.165582 | 0.153808 | 728.3091 |
| 289.6 | 326.4000  | 0.19163  | 0.145898 | 0.085535 | 0.045366 | 0.020419 | 0.011713 | 0.009184 | 0.190193 | 0.181641 | 0.172002 | 0.163537 | 715.1878 |
| 289.8 | 301.6000  | 0.197698 | 0.149784 | 0.087669 | 0.046546 | 0.021665 | 0.010843 | 0.007896 | 0.19713  | 0.187909 | 0.179411 | 0.170513 | 704.4006 |
| 290.0 | 276.8000  | 0.20318  | 0.153124 | 0.088802 | 0.047327 | 0.02031  | 0.011374 | 0.008608 | 0.206365 | 0.195706 | 0.187705 | 0.176334 | 694.5556 |
| 290.2 | 255.0400  | 0.211691 | 0.155522 | 0.091527 | 0.048636 | 0.022309 | 0.012306 | 0.009922 | 0.21326  | 0.203249 | 0.193488 | 0.183332 | 687.3882 |
| 290.4 | 233.2800  | 0.218235 | 0.160636 | 0.092751 | 0.050045 | 0.022908 | 0.013539 | 0.009437 | 0.221115 | 0.210112 | 0.201052 | 0.190123 | 680.6185 |
| 290.6 | 214.7600  | 0.220674 | 0.162932 | 0.0929   | 0.050638 | 0.02363  | 0.014054 | 0.010341 | 0.226318 | 0.215601 | 0.205896 | 0.196007 | 671.8502 |
| 290.8 | 199.4800  | 0.224694 | 0.161967 | 0.094773 | 0.050215 | 0.024776 | 0.013051 | 0.010734 | 0.228889 | 0.218822 | 0.209501 | 0.199843 | 663.0873 |
| 291.0 | 184.2000  | 0.229122 | 0.165505 | 0.096746 | 0.051992 | 0.023923 | 0.013748 | 0.010327 | 0.234775 | 0.224654 | 0.21524  | 0.204179 | 658.9541 |
| 291.2 | 171.2400  | 0.23109  | 0.165868 | 0.095648 | 0.052356 | 0.024428 | 0.014618 | 0.009569 | 0.23965  | 0.229374 | 0.218239 | 0.206466 | 652.4969 |
| 291.4 | 158.2800  | 0.235577 | 0.168102 | 0.097451 | 0.05192  | 0.025633 | 0.013989 | 0.010912 | 0.243749 | 0.232329 | 0.222196 | 0.211504 | 648.0408 |
| 291.6 | 146.0400  | 0.242406 | 0.1724   | 0.099515 | 0.054525 | 0.026632 | 0.015488 | 0.012607 | 0.248378 | 0.236103 | 0.226358 | 0.215381 | 646.0483 |
| 291.8 | 134.5200  | 0.239891 | 0.170042 | 0.098239 | 0.052471 | 0.026126 | 0.014017 | 0.010556 | 0.250628 | 0.23945  | 0.229178 | 0.217133 | 636.6967 |
| 292.0 | 123.0000  | 0.246853 | 0.174874 | 0.101764 | 0.054217 | 0.026019 | 0.016246 | 0.012305 | 0.256467 | 0.245287 | 0.233302 | 0.222068 | 637.3699 |
| 292.2 | 115.3200  | 0.247215 | 0.174373 | 0.099414 | 0.054414 | 0.027048 | 0.015999 | 0.012104 | 0.259438 | 0.247754 | 0.236711 | 0.224541 | 633.8384 |
| 292.4 | 107.6400  | 0.24914  | 0.174537 | 0.100664 | 0.054612 | 0.025477 | 0.014251 | 0.010503 | 0.261127 | 0.24935  | 0.239581 | 0.226395 | 630.0134 |

|       |          |          |          |          |          |          |          |          |          |          |          |          |          |
|-------|----------|----------|----------|----------|----------|----------|----------|----------|----------|----------|----------|----------|----------|
| 292.6 | 100.8400 | 0.253349 | 0.178164 | 0.101921 | 0.054614 | 0.027577 | 0.016318 | 0.012945 | 0.263056 | 0.251466 | 0.240388 | 0.228605 | 628.5481 |
| 292.8 | 94.9200  | 0.254564 | 0.176629 | 0.100287 | 0.054623 | 0.027447 | 0.016598 | 0.01243  | 0.265689 | 0.254127 | 0.241533 | 0.229497 | 625.3844 |
| 293.0 | 89.0000  | 0.253559 | 0.177557 | 0.101352 | 0.054331 | 0.026617 | 0.015278 | 0.011815 | 0.267416 | 0.254983 | 0.243077 | 0.231406 | 621.6904 |
| 293.2 | 82.6000  | 0.256745 | 0.179265 | 0.102077 | 0.054245 | 0.027458 | 0.015905 | 0.012131 | 0.270652 | 0.257361 | 0.246147 | 0.23278  | 620.8489 |
| 293.4 | 76.2000  | 0.259219 | 0.178146 | 0.102302 | 0.05506  | 0.027499 | 0.015732 | 0.012147 | 0.271199 | 0.26006  | 0.247971 | 0.235487 | 618.1185 |
| 293.6 | 70.6800  | 0.258679 | 0.180895 | 0.102734 | 0.05538  | 0.02681  | 0.016273 | 0.011606 | 0.2733   | 0.262134 | 0.24929  | 0.236062 | 615.46   |
| 293.8 | 66.0400  | 0.261301 | 0.181162 | 0.102475 | 0.054705 | 0.027992 | 0.017028 | 0.012207 | 0.275133 | 0.262916 | 0.249304 | 0.236069 | 612.8534 |
| 294.0 | 61.4000  | 0.261438 | 0.180823 | 0.103415 | 0.055331 | 0.027274 | 0.016283 | 0.012309 | 0.276076 | 0.263086 | 0.250276 | 0.237099 | 609.4981 |
| 294.2 | 57.4800  | 0.260981 | 0.181239 | 0.103417 | 0.054897 | 0.02685  | 0.015667 | 0.011764 | 0.277148 | 0.264347 | 0.251224 | 0.240134 | 607.8523 |
| 294.4 | 53.5600  | 0.263544 | 0.181108 | 0.102018 | 0.054763 | 0.027927 | 0.016251 | 0.011519 | 0.278801 | 0.266542 | 0.253114 | 0.239626 | 606.7422 |
| 294.6 | 49.5600  | 0.264408 | 0.181323 | 0.103346 | 0.054747 | 0.026315 | 0.015843 | 0.012579 | 0.278607 | 0.267458 | 0.254926 | 0.240224 | 604.403  |
| 294.8 | 45.4800  | 0.263332 | 0.181992 | 0.101601 | 0.054249 | 0.026914 | 0.015843 | 0.012044 | 0.279973 | 0.266745 | 0.253699 | 0.240333 | 599.7058 |
| 295.0 | 41.4000  | 0.266999 | 0.182458 | 0.103955 | 0.054551 | 0.027714 | 0.016743 | 0.012109 | 0.281984 | 0.269256 | 0.255041 | 0.242588 | 600.5169 |
| 295.2 | 39.4800  | 0.264959 | 0.182503 | 0.103693 | 0.054675 | 0.027396 | 0.016131 | 0.012134 | 0.28195  | 0.269938 | 0.256071 | 0.242266 | 598.3702 |
| 295.4 | 37.5600  | 0.265186 | 0.181402 | 0.10173  | 0.054499 | 0.027579 | 0.016119 | 0.012759 | 0.282512 | 0.269207 | 0.257433 | 0.241001 | 596.0448 |
| 295.6 | 35.5200  | 0.266983 | 0.182408 | 0.103407 | 0.05385  | 0.027679 | 0.015819 | 0.012591 | 0.282641 | 0.269591 | 0.2579   | 0.242301 | 595.8817 |
| 295.8 | 33.3600  | 0.265422 | 0.182978 | 0.103224 | 0.054427 | 0.027796 | 0.016131 | 0.012832 | 0.28275  | 0.268916 | 0.255425 | 0.242406 | 592.1977 |
| 296.0 | 31.2000  | 0.266867 | 0.181877 | 0.102042 | 0.054605 | 0.026614 | 0.016942 | 0.012672 | 0.283904 | 0.270724 | 0.256201 | 0.243117 | 591.8785 |
| 296.2 | 29.2000  | 0.267181 | 0.182982 | 0.102706 | 0.054047 | 0.028108 | 0.015838 | 0.012502 | 0.285031 | 0.271478 | 0.259598 | 0.243521 | 592.5056 |
| 296.4 | 27.2000  | 0.265525 | 0.183677 | 0.10237  | 0.053889 | 0.027302 | 0.016034 | 0.012732 | 0.285451 | 0.271364 | 0.260019 | 0.244538 | 590.6659 |
| 296.6 | 25.6400  | 0.267032 | 0.182292 | 0.102488 | 0.054634 | 0.026031 | 0.016287 | 0.012933 | 0.286036 | 0.271795 | 0.258978 | 0.244224 | 589.2473 |
| 296.8 | 24.5200  | 0.268747 | 0.183896 | 0.102959 | 0.053781 | 0.027496 | 0.016397 | 0.013506 | 0.285887 | 0.272575 | 0.257356 | 0.245465 | 589.2393 |
| 297.0 | 23.4000  | 0.266291 | 0.182687 | 0.101331 | 0.053729 | 0.02706  | 0.017007 | 0.012379 | 0.285565 | 0.273265 | 0.259875 | 0.244572 | 587.5364 |
| 297.2 | 22.4400  | 0.267423 | 0.18185  | 0.10235  | 0.053841 | 0.027201 | 0.016301 | 0.012441 | 0.285926 | 0.273308 | 0.260666 | 0.245237 | 587.6184 |
| 297.4 | 21.4800  | 0.268582 | 0.18321  | 0.103369 | 0.053553 | 0.027442 | 0.015795 | 0.013304 | 0.286507 | 0.272678 | 0.260329 | 0.245752 | 587.5366 |
| 297.6 | 20.4000  | 0.266123 | 0.182299 | 0.101227 | 0.054392 | 0.026701 | 0.016301 | 0.012074 | 0.28842  | 0.27365  | 0.260836 | 0.245642 | 586.453  |
| 297.8 | 19.2000  | 0.268092 | 0.18277  | 0.102026 | 0.053757 | 0.026478 | 0.015018 | 0.012352 | 0.287766 | 0.274929 | 0.260096 | 0.245309 | 585.9164 |
| 298.0 | 18.0000  | 0.268016 | 0.182572 | 0.101624 | 0.053522 | 0.026954 | 0.016636 | 0.01393  | 0.287822 | 0.275038 | 0.262263 | 0.245831 | 585.739  |
| 298.2 | 17.2800  | 0.267531 | 0.18173  | 0.102663 | 0.053281 | 0.02686  | 0.016007 | 0.011577 | 0.288094 | 0.273892 | 0.261859 | 0.246802 | 584.578  |
| 298.4 | 16.5600  | 0.268385 | 0.182687 | 0.102702 | 0.05384  | 0.026766 | 0.015377 | 0.011624 | 0.289381 | 0.275494 | 0.261421 | 0.247022 | 585.4642 |
| 298.6 | 15.7600  | 0.268216 | 0.183126 | 0.102468 | 0.054417 | 0.026883 | 0.017056 | 0.013076 | 0.290553 | 0.275871 | 0.263027 | 0.246368 | 585.7671 |
| 298.8 | 14.8800  | 0.268665 | 0.183368 | 0.10326  | 0.053612 | 0.026713 | 0.016842 | 0.012633 | 0.290548 | 0.277619 | 0.263964 | 0.247823 | 586.7068 |
| 299.0 | 14.0000  | 0.269795 | 0.184094 | 0.101652 | 0.054006 | 0.026742 | 0.015028 | 0.01199  | 0.289439 | 0.27737  | 0.262706 | 0.248494 | 585.3902 |
| 299.2 | 13.6000  | 0.268895 | 0.183224 | 0.102785 | 0.053794 | 0.027501 | 0.017367 | 0.013416 | 0.289914 | 0.27736  | 0.263541 | 0.249356 | 585.5189 |
| 299.4 | 13.2000  | 0.269089 | 0.184338 | 0.103318 | 0.054283 | 0.02806  | 0.017006 | 0.013742 | 0.292199 | 0.277604 | 0.265072 | 0.248485 | 586.8356 |
| 299.6 | 12.8800  | 0.268681 | 0.183188 | 0.101824 | 0.053454 | 0.025507 | 0.014738 | 0.011363 | 0.292613 | 0.27714  | 0.265694 | 0.248849 | 586.0687 |
| 299.8 | 12.6400  | 0.269402 | 0.184045 | 0.103204 | 0.053807 | 0.027342 | 0.016861 | 0.013578 | 0.291204 | 0.278538 | 0.264779 | 0.249822 | 586.5908 |
| 300.0 | 12.4000  | 0.26945  | 0.18361  | 0.102383 | 0.05316  | 0.026677 | 0.015885 | 0.013094 | 0.290942 | 0.279011 | 0.265481 | 0.250306 | 586.6059 |
| 300.2 | 12.2400  | 0.268887 | 0.183339 | 0.101536 | 0.053595 | 0.026201 | 0.016    | 0.012204 | 0.29181  | 0.278594 | 0.265958 | 0.249396 | 586.1194 |
| 300.4 | 12.0800  | 0.268353 | 0.183729 | 0.103589 | 0.05293  | 0.027424 | 0.016716 | 0.012515 | 0.292462 | 0.279258 | 0.266465 | 0.24926  | 586.7958 |
| 300.6 | 11.8000  | 0.268399 | 0.184278 | 0.101882 | 0.052592 | 0.025465 | 0.014444 | 0.012833 | 0.294312 | 0.279456 | 0.265393 | 0.250991 | 587.3719 |
| 300.8 | 11.4000  | 0.269469 | 0.184916 | 0.103315 | 0.053381 | 0.026824 | 0.016183 | 0.013059 | 0.293373 | 0.281001 | 0.267    | 0.251015 | 588.6514 |
| 301.0 | 11.0000  | 0.269601 | 0.185659 | 0.104048 | 0.053769 | 0.027583 | 0.016722 | 0.013285 | 0.29198  | 0.280856 | 0.267555 | 0.251596 | 588.4213 |

|       |         |          |          |          |          |          |          |          |          |          |          |          |          |
|-------|---------|----------|----------|----------|----------|----------|----------|----------|----------|----------|----------|----------|----------|
| 301.2 | 11.1600 | 0.269575 | 0.183902 | 0.101595 | 0.053234 | 0.026559 | 0.016106 | 0.012975 | 0.29422  | 0.28058  | 0.268024 | 0.251158 | 588.6107 |
| 301.4 | 11.3200 | 0.268585 | 0.183935 | 0.102742 | 0.051998 | 0.026836 | 0.015491 | 0.012964 | 0.294191 | 0.279491 | 0.266652 | 0.250827 | 587.4017 |
| 301.6 | 11.0400 | 0.268784 | 0.18499  | 0.102835 | 0.05336  | 0.026177 | 0.016118 | 0.012082 | 0.293867 | 0.281034 | 0.267043 | 0.252716 | 588.8206 |
| 301.8 | 10.3200 | 0.270534 | 0.184007 | 0.102674 | 0.053319 | 0.026083 | 0.015689 | 0.012729 | 0.294272 | 0.282746 | 0.269264 | 0.253366 | 590.3966 |
| 302.0 | 9.6000  | 0.270452 | 0.185114 | 0.103913 | 0.053478 | 0.026689 | 0.016059 | 0.013876 | 0.295303 | 0.282475 | 0.269477 | 0.252802 | 590.2883 |
| 302.2 | 9.6800  | 0.270975 | 0.185946 | 0.103486 | 0.053861 | 0.026577 | 0.016151 | 0.012871 | 0.29529  | 0.281242 | 0.269029 | 0.253098 | 590.1415 |
| 302.4 | 9.7600  | 0.269922 | 0.183891 | 0.10326  | 0.053343 | 0.026465 | 0.016344 | 0.012366 | 0.29658  | 0.282086 | 0.269234 | 0.254429 | 590.7406 |
| 302.6 | 9.7200  | 0.270022 | 0.18488  | 0.103773 | 0.054052 | 0.027371 | 0.016647 | 0.013068 | 0.296033 | 0.283077 | 0.269572 | 0.254103 | 591.2905 |
| 302.8 | 9.5600  | 0.269658 | 0.185456 | 0.103126 | 0.053487 | 0.026495 | 0.015563 | 0.012379 | 0.295889 | 0.284274 | 0.270276 | 0.253478 | 591.4086 |
| 303.0 | 9.4000  | 0.270903 | 0.185018 | 0.103579 | 0.053423 | 0.026618 | 0.015879 | 0.011889 | 0.295375 | 0.282505 | 0.269913 | 0.253632 | 590.6565 |
| 303.2 | 9.4000  | 0.269751 | 0.184865 | 0.103779 | 0.053623 | 0.025318 | 0.016679 | 0.012489 | 0.295512 | 0.28129  | 0.269209 | 0.253873 | 589.6314 |
| 303.4 | 9.4000  | 0.26984  | 0.184677 | 0.103279 | 0.053223 | 0.027418 | 0.016579 | 0.013989 | 0.295609 | 0.282775 | 0.270113 | 0.255225 | 591.0899 |
| 303.6 | 9.2400  | 0.271025 | 0.1852   | 0.103832 | 0.054258 | 0.026142 | 0.016194 | 0.011999 | 0.295599 | 0.283751 | 0.269953 | 0.25497  | 591.7426 |
| 303.8 | 8.9200  | 0.268041 | 0.184844 | 0.102939 | 0.052729 | 0.026189 | 0.014926 | 0.01242  | 0.296573 | 0.283702 | 0.270506 | 0.253547 | 590.1326 |
| 304.0 | 8.6000  | 0.271047 | 0.185728 | 0.103345 | 0.053099 | 0.026636 | 0.016057 | 0.013441 | 0.295575 | 0.281633 | 0.270432 | 0.254628 | 590.3471 |
| 304.2 | 8.6800  | 0.271102 | 0.184462 | 0.103418 | 0.053382 | 0.025424 | 0.016349 | 0.011936 | 0.295287 | 0.283054 | 0.270344 | 0.255247 | 590.7674 |
| 304.4 | 8.7600  | 0.268754 | 0.184034 | 0.103292 | 0.052464 | 0.026712 | 0.015842 | 0.012931 | 0.294958 | 0.282783 | 0.269437 | 0.255022 | 589.2286 |
| 304.6 | 8.7200  | 0.270115 | 0.183607 | 0.104205 | 0.053173 | 0.027718 | 0.016645 | 0.013533 | 0.294437 | 0.283425 | 0.269839 | 0.253765 | 589.5228 |
| 304.8 | 8.5600  | 0.269333 | 0.18422  | 0.102758 | 0.052908 | 0.025642 | 0.016661 | 0.011544 | 0.295291 | 0.281856 | 0.270597 | 0.254956 | 589.3861 |
| 305.0 | 8.4000  | 0.268213 | 0.184599 | 0.103311 | 0.052644 | 0.026465 | 0.015277 | 0.012054 | 0.295458 | 0.281431 | 0.270533 | 0.254978 | 588.8579 |
| 305.2 | 8.0800  | 0.268732 | 0.185358 | 0.104517 | 0.052914 | 0.026312 | 0.016408 | 0.013275 | 0.294027 | 0.282269 | 0.269951 | 0.25452  | 588.453  |
| 305.4 | 7.7600  | 0.270182 | 0.185375 | 0.102724 | 0.052985 | 0.026359 | 0.01604  | 0.011996 | 0.293939 | 0.282927 | 0.268253 | 0.254515 | 587.9822 |
| 305.6 | 7.8000  | 0.267309 | 0.183253 | 0.10321  | 0.052776 | 0.026853 | 0.015836 | 0.012193 | 0.293118 | 0.280777 | 0.26904  | 0.254843 | 585.8346 |
| 305.8 | 8.2000  | 0.268203 | 0.184821 | 0.104878 | 0.054488 | 0.027195 | 0.017596 | 0.013067 | 0.293748 | 0.280539 | 0.269865 | 0.253963 | 587.4266 |
| 306.0 | 8.6000  | 0.267481 | 0.183364 | 0.101945 | 0.052399 | 0.025936 | 0.015057 | 0.013241 | 0.293397 | 0.279304 | 0.268928 | 0.252239 | 585.0486 |
| 306.2 | 7.9600  | 0.265315 | 0.183778 | 0.102657 | 0.052741 | 0.02493  | 0.01552  | 0.011483 | 0.290308 | 0.280207 | 0.267205 | 0.252976 | 582.5118 |
| 306.4 | 7.3200  | 0.267902 | 0.18457  | 0.10317  | 0.053382 | 0.027224 | 0.017283 | 0.013324 | 0.290496 | 0.279406 | 0.267476 | 0.253692 | 583.3314 |
| 306.6 | 7.2400  | 0.264426 | 0.182001 | 0.102996 | 0.0529   | 0.026036 | 0.01559  | 0.012529 | 0.290768 | 0.280244 | 0.267566 | 0.252398 | 581.3108 |
| 306.8 | 7.7200  | 0.264499 | 0.183257 | 0.104037 | 0.053294 | 0.027165 | 0.017343 | 0.012198 | 0.290543 | 0.277388 | 0.266969 | 0.250859 | 580.3112 |
| 307.0 | 8.2000  | 0.263174 | 0.182066 | 0.101978 | 0.052188 | 0.025895 | 0.016196 | 0.012767 | 0.289267 | 0.276014 | 0.264586 | 0.250532 | 577.5922 |
| 307.2 | 8.1200  | 0.264484 | 0.181791 | 0.102704 | 0.053005 | 0.025206 | 0.015004 | 0.012572 | 0.285721 | 0.274812 | 0.263708 | 0.24959  | 575.4134 |
| 307.4 | 8.0400  | 0.262644 | 0.182332 | 0.103031 | 0.052423 | 0.026918 | 0.016612 | 0.012377 | 0.285618 | 0.274907 | 0.263091 | 0.249544 | 574.6386 |
| 307.6 | 8.0800  | 0.262273 | 0.18112  | 0.102617 | 0.053414 | 0.028212 | 0.016808 | 0.013175 | 0.285366 | 0.274689 | 0.262144 | 0.247491 | 573.0444 |
| 307.8 | 8.2400  | 0.258421 | 0.179534 | 0.102164 | 0.052379 | 0.025689 | 0.015192 | 0.012464 | 0.284662 | 0.273012 | 0.26111  | 0.247607 | 569.944  |
| 308.0 | 8.4000  | 0.258163 | 0.18022  | 0.101311 | 0.051244 | 0.025765 | 0.015377 | 0.011254 | 0.282956 | 0.270823 | 0.260791 | 0.246219 | 567.7977 |
| 308.2 | 8.0800  | 0.258855 | 0.178975 | 0.101617 | 0.051714 | 0.025612 | 0.014608 | 0.011075 | 0.281081 | 0.270615 | 0.259097 | 0.24564  | 565.7853 |
| 308.4 | 7.7600  | 0.25684  | 0.178913 | 0.101724 | 0.051885 | 0.025859 | 0.01504  | 0.012396 | 0.280595 | 0.270428 | 0.258024 | 0.243942 | 563.4991 |
| 308.6 | 7.7200  | 0.255382 | 0.179455 | 0.099737 | 0.051494 | 0.025765 | 0.014643 | 0.011598 | 0.27892  | 0.270006 | 0.25718  | 0.242704 | 561.1577 |
| 308.8 | 7.9600  | 0.256446 | 0.178447 | 0.101357 | 0.052641 | 0.02633  | 0.01522  | 0.011683 | 0.27866  | 0.26721  | 0.256902 | 0.24257  | 560.4846 |
| 309.0 | 8.2000  | 0.253661 | 0.178299 | 0.102278 | 0.052788 | 0.026995 | 0.016196 | 0.012567 | 0.276607 | 0.265401 | 0.256499 | 0.24117  | 557.6759 |
| 309.2 | 7.7200  | 0.251833 | 0.177333 | 0.100737 | 0.050494 | 0.025565 | 0.015243 | 0.012298 | 0.274723 | 0.265211 | 0.254605 | 0.239174 | 553.6411 |
| 309.4 | 7.2400  | 0.252692 | 0.17704  | 0.101596 | 0.0515   | 0.026336 | 0.01549  | 0.011529 | 0.272801 | 0.264056 | 0.250807 | 0.238994 | 550.835  |
| 309.6 | 7.3200  | 0.249122 | 0.176666 | 0.09997  | 0.051482 | 0.027024 | 0.015083 | 0.011824 | 0.271578 | 0.260507 | 0.250481 | 0.236356 | 546.408  |

|       |        |          |          |          |          |          |          |          |          |          |          |          |          |
|-------|--------|----------|----------|----------|----------|----------|----------|----------|----------|----------|----------|----------|----------|
| 309.8 | 7.9600 | 0.249393 | 0.175705 | 0.101257 | 0.051441 | 0.02623  | 0.01592  | 0.012883 | 0.269752 | 0.258588 | 0.249675 | 0.234829 | 544.7269 |
| 310.0 | 8.6000 | 0.247114 | 0.174753 | 0.099345 | 0.051399 | 0.026336 | 0.015357 | 0.011841 | 0.267902 | 0.257836 | 0.247603 | 0.23421  | 542.0274 |
| 310.2 | 7.8000 | 0.244446 | 0.17366  | 0.09921  | 0.051276 | 0.025253 | 0.015336 | 0.012193 | 0.266699 | 0.256424 | 0.245381 | 0.233515 | 537.839  |
| 310.4 | 7.0000 | 0.246519 | 0.174809 | 0.100476 | 0.051453 | 0.026271 | 0.015514 | 0.013245 | 0.264971 | 0.256097 | 0.243798 | 0.231565 | 536.1005 |
| 310.6 | 6.8000 | 0.245271 | 0.173662 | 0.099542 | 0.051897 | 0.0262   | 0.016034 | 0.012158 | 0.263519 | 0.253151 | 0.244042 | 0.229241 | 532.6023 |
| 310.8 | 7.2000 | 0.240382 | 0.171461 | 0.09911  | 0.052009 | 0.025942 | 0.016194 | 0.011532 | 0.261552 | 0.250987 | 0.242909 | 0.229908 | 528.8845 |
| 311.0 | 7.6000 | 0.240648 | 0.170358 | 0.100377 | 0.05042  | 0.026483 | 0.014555 | 0.012406 | 0.258337 | 0.249836 | 0.238605 | 0.22729  | 524.8264 |
| 311.2 | 6.8800 | 0.240634 | 0.172068 | 0.099316 | 0.05188  | 0.026389 | 0.016526 | 0.013653 | 0.25827  | 0.249213 | 0.2382   | 0.22667  | 523.8502 |
| 311.4 | 6.1600 | 0.237331 | 0.170559 | 0.098955 | 0.051139 | 0.025694 | 0.015796 | 0.0115   | 0.255789 | 0.246943 | 0.237792 | 0.22423  | 518.5175 |
| 311.6 | 6.0800 | 0.235492 | 0.168574 | 0.098681 | 0.049256 | 0.025706 | 0.013504 | 0.011805 | 0.254036 | 0.245603 | 0.235627 | 0.223794 | 514.926  |
| 311.8 | 6.6400 | 0.235528 | 0.169303 | 0.097096 | 0.051133 | 0.026024 | 0.015649 | 0.012468 | 0.251102 | 0.242495 | 0.232449 | 0.221902 | 511.3336 |
| 312.0 | 7.2000 | 0.232147 | 0.166842 | 0.09721  | 0.051109 | 0.025742 | 0.015494 | 0.011132 | 0.248448 | 0.241337 | 0.231025 | 0.219837 | 507.2965 |
| 312.2 | 6.8800 | 0.23103  | 0.166376 | 0.097416 | 0.04978  | 0.025089 | 0.016226 | 0.012153 | 0.245847 | 0.237079 | 0.228016 | 0.216613 | 501.37   |
| 312.4 | 6.5600 | 0.227538 | 0.164707 | 0.096722 | 0.05045  | 0.025336 | 0.015857 | 0.011974 | 0.244678 | 0.235253 | 0.226839 | 0.214954 | 497.1483 |
| 312.6 | 6.5600 | 0.226275 | 0.163723 | 0.096322 | 0.05025  | 0.025936 | 0.014057 | 0.011374 | 0.240778 | 0.233328 | 0.223806 | 0.213783 | 492.4702 |
| 312.8 | 6.8800 | 0.225903 | 0.164465 | 0.095516 | 0.04978  | 0.025989 | 0.015926 | 0.011353 | 0.2387   | 0.230585 | 0.221739 | 0.210509 | 488.8291 |
| 313.0 | 7.2000 | 0.221498 | 0.161097 | 0.09541  | 0.050309 | 0.025542 | 0.015594 | 0.011932 | 0.236173 | 0.22725  | 0.219661 | 0.208304 | 482.9072 |
| 313.2 | 7.0400 | 0.220616 | 0.161407 | 0.094763 | 0.050444 | 0.025965 | 0.01521  | 0.012442 | 0.234675 | 0.22572  | 0.219064 | 0.206538 | 480.3662 |
| 313.4 | 6.8800 | 0.220118 | 0.161104 | 0.095416 | 0.04848  | 0.024989 | 0.015426 | 0.011653 | 0.231688 | 0.224897 | 0.215616 | 0.20458  | 476.3133 |
| 313.6 | 6.8800 | 0.217131 | 0.159534 | 0.095316 | 0.05048  | 0.026589 | 0.016826 | 0.012953 | 0.228414 | 0.22128  | 0.212694 | 0.202267 | 470.4076 |
| 313.8 | 7.0400 | 0.215002 | 0.158093 | 0.092763 | 0.050244 | 0.025065 | 0.01551  | 0.012542 | 0.226502 | 0.218163 | 0.211125 | 0.199764 | 465.5657 |
| 314.0 | 7.2000 | 0.212107 | 0.155542 | 0.09261  | 0.048609 | 0.025642 | 0.015394 | 0.010832 | 0.22395  | 0.215173 | 0.209172 | 0.197788 | 460.3219 |
| 314.2 | 6.7200 | 0.209428 | 0.1547   | 0.093569 | 0.049015 | 0.026012 | 0.015041 | 0.012363 | 0.221991 | 0.213985 | 0.205476 | 0.195833 | 455.489  |
| 314.4 | 6.2400 | 0.209005 | 0.15498  | 0.091528 | 0.049621 | 0.024283 | 0.015188 | 0.012194 | 0.218376 | 0.21294  | 0.204627 | 0.194232 | 451.8705 |
| 314.6 | 6.2000 | 0.209379 | 0.154697 | 0.092142 | 0.04833  | 0.025889 | 0.015992 | 0.012197 | 0.215778 | 0.208835 | 0.201707 | 0.193402 | 447.8752 |
| 314.8 | 6.6000 | 0.204341 | 0.152058 | 0.092709 | 0.049541 | 0.02733  | 0.015353 | 0.013371 | 0.213773 | 0.205523 | 0.199185 | 0.188773 | 441.327  |
| 315.0 | 7.0000 | 0.202737 | 0.15174  | 0.090276 | 0.048453 | 0.025871 | 0.015514 | 0.012445 | 0.209855 | 0.202883 | 0.195072 | 0.186082 | 435.4859 |
| 315.2 | 6.6800 | 0.198438 | 0.14846  | 0.090782 | 0.047524 | 0.026018 | 0.015145 | 0.011966 | 0.205047 | 0.200295 | 0.192608 | 0.181947 | 427.485  |
| 315.4 | 6.3600 | 0.198252 | 0.149851 | 0.089688 | 0.048794 | 0.025565 | 0.015977 | 0.013287 | 0.202517 | 0.197468 | 0.190077 | 0.182045 | 424.3127 |
| 315.6 | 6.3200 | 0.195329 | 0.145919 | 0.088302 | 0.046703 | 0.024571 | 0.014181 | 0.011389 | 0.201012 | 0.192827 | 0.187332 | 0.17827  | 417.0918 |
| 315.8 | 6.5600 | 0.192224 | 0.145756 | 0.088422 | 0.04785  | 0.024836 | 0.014757 | 0.011574 | 0.197416 | 0.190945 | 0.183975 | 0.174558 | 411.4713 |
| 316.0 | 6.8000 | 0.18965  | 0.144549 | 0.087242 | 0.046997 | 0.0257   | 0.014734 | 0.010858 | 0.1944   | 0.188227 | 0.180622 | 0.172183 | 405.9114 |
| 316.2 | 6.7200 | 0.188532 | 0.142509 | 0.087669 | 0.047015 | 0.025112 | 0.015041 | 0.011163 | 0.191709 | 0.186745 | 0.178991 | 0.171483 | 402.4707 |
| 316.4 | 6.6400 | 0.184777 | 0.142806 | 0.085996 | 0.045833 | 0.024824 | 0.014249 | 0.011768 | 0.188419 | 0.182173 | 0.177378 | 0.168488 | 395.9939 |
| 316.6 | 6.8800 | 0.181921 | 0.140903 | 0.086316 | 0.04598  | 0.024989 | 0.014326 | 0.010853 | 0.185076 | 0.178483 | 0.173305 | 0.164668 | 389.0792 |
| 316.8 | 7.4400 | 0.181677 | 0.138802 | 0.08563  | 0.047456 | 0.025006 | 0.015671 | 0.011516 | 0.181691 | 0.174823 | 0.169448 | 0.162258 | 383.9602 |
| 317.0 | 8.0000 | 0.177415 | 0.138584 | 0.084044 | 0.046432 | 0.024924 | 0.014416 | 0.011178 | 0.177232 | 0.173136 | 0.166368 | 0.159538 | 378.0451 |
| 317.2 | 7.2800 | 0.176261 | 0.138102 | 0.085183 | 0.047791 | 0.02713  | 0.015687 | 0.011627 | 0.175176 | 0.170359 | 0.165107 | 0.156973 | 373.7829 |
| 317.4 | 6.5600 | 0.173649 | 0.133876 | 0.083322 | 0.04615  | 0.024136 | 0.014257 | 0.010474 | 0.172293 | 0.166472 | 0.162287 | 0.153716 | 365.7499 |
| 317.6 | 6.5200 | 0.169975 | 0.134871 | 0.082035 | 0.044159 | 0.023942 | 0.013161 | 0.010976 | 0.169883 | 0.163772 | 0.159238 | 0.152156 | 360.5611 |
| 317.8 | 7.1600 | 0.168413 | 0.132977 | 0.083123 | 0.046018 | 0.025547 | 0.015198 | 0.012135 | 0.166828 | 0.160488 | 0.155374 | 0.149158 | 355.481  |
| 318.0 | 7.8000 | 0.164613 | 0.130324 | 0.08061  | 0.044176 | 0.024153 | 0.013536 | 0.009793 | 0.160948 | 0.156978 | 0.151304 | 0.144246 | 346.5333 |
| 318.2 | 7.5600 | 0.15966  | 0.129795 | 0.08049  | 0.044529 | 0.025489 | 0.014359 | 0.010809 | 0.15795  | 0.152978 | 0.148913 | 0.141176 | 339.6844 |

|       |        |          |          |          |          |          |          |          |          |          |          |          |          |
|-------|--------|----------|----------|----------|----------|----------|----------|----------|----------|----------|----------|----------|----------|
| 318.4 | 7.3200 | 0.159273 | 0.126025 | 0.07947  | 0.044482 | 0.022824 | 0.013583 | 0.010824 | 0.154793 | 0.149847 | 0.146122 | 0.139723 | 334.1202 |
| 318.6 | 6.8400 | 0.15897  | 0.127685 | 0.080229 | 0.044388 | 0.024395 | 0.01383  | 0.010455 | 0.153442 | 0.146993 | 0.143917 | 0.137781 | 330.8211 |
| 318.8 | 6.1200 | 0.156069 | 0.126597 | 0.080768 | 0.044447 | 0.0239   | 0.0148   | 0.011602 | 0.150671 | 0.145502 | 0.140332 | 0.135158 | 324.8844 |
| 319.0 | 5.4000 | 0.155512 | 0.124547 | 0.079307 | 0.045207 | 0.024806 | 0.014571 | 0.012249 | 0.147001 | 0.143221 | 0.13816  | 0.132604 | 319.2635 |
| 319.2 | 5.6400 | 0.152506 | 0.124064 | 0.079628 | 0.045254 | 0.025171 | 0.013447 | 0.010733 | 0.143597 | 0.140542 | 0.135909 | 0.130435 | 314.2556 |
| 319.4 | 5.8800 | 0.147783 | 0.120606 | 0.078348 | 0.043901 | 0.023136 | 0.013924 | 0.010418 | 0.141157 | 0.137193 | 0.133113 | 0.127973 | 307.4738 |
| 319.6 | 6.2000 | 0.148466 | 0.121338 | 0.077442 | 0.04463  | 0.024889 | 0.015292 | 0.011997 | 0.138495 | 0.133846 | 0.130289 | 0.124307 | 303.4282 |
| 319.8 | 6.6000 | 0.143857 | 0.118717 | 0.077009 | 0.042241 | 0.02463  | 0.013953 | 0.010271 | 0.134404 | 0.130706 | 0.12564  | 0.12177  | 295.7523 |
| 320.0 | 7.0000 | 0.140771 | 0.116287 | 0.076876 | 0.042553 | 0.023371 | 0.014414 | 0.009845 | 0.13059  | 0.128243 | 0.123458 | 0.119528 | 290.3134 |
| 320.2 | 6.6800 | 0.140897 | 0.117371 | 0.076682 | 0.044424 | 0.024818 | 0.014445 | 0.012066 | 0.128666 | 0.125504 | 0.121703 | 0.117707 | 287.2623 |
| 320.4 | 6.3600 | 0.13754  | 0.115503 | 0.075288 | 0.042894 | 0.023665 | 0.013977 | 0.010887 | 0.125928 | 0.12229  | 0.118655 | 0.113156 | 279.8034 |
| 320.6 | 6.5200 | 0.13426  | 0.113108 | 0.074535 | 0.041959 | 0.023942 | 0.014361 | 0.010676 | 0.123589 | 0.119031 | 0.114722 | 0.110534 | 273.439  |
| 320.8 | 7.1600 | 0.132222 | 0.112072 | 0.074323 | 0.042318 | 0.024047 | 0.013198 | 0.010935 | 0.118049 | 0.115561 | 0.111606 | 0.107771 | 267.2969 |
| 321.0 | 7.8000 | 0.130269 | 0.1096   | 0.07251  | 0.041476 | 0.023453 | 0.014436 | 0.010093 | 0.116537 | 0.112893 | 0.108713 | 0.105195 | 262.7011 |
| 321.2 | 7.7200 | 0.125623 | 0.106841 | 0.072837 | 0.041794 | 0.022665 | 0.012243 | 0.010298 | 0.110402 | 0.10853  | 0.10563  | 0.100162 | 253.1314 |
| 321.4 | 7.6400 | 0.127176 | 0.109605 | 0.073964 | 0.044512 | 0.023177 | 0.014651 | 0.012803 | 0.10937  | 0.103792 | 0.101351 | 0.099543 | 250.4874 |
| 321.6 | 7.0800 | 0.123412 | 0.108474 | 0.071149 | 0.042035 | 0.023859 | 0.014106 | 0.01254  | 0.106078 | 0.103284 | 0.099122 | 0.096466 | 244.3455 |
| 321.8 | 6.0400 | 0.122692 | 0.104994 | 0.071295 | 0.041565 | 0.022112 | 0.012608 | 0.012007 | 0.105482 | 0.101918 | 0.099545 | 0.095736 | 241.2759 |
| 322.0 | 5.0000 | 0.121369 | 0.106614 | 0.07364  | 0.045195 | 0.024465 | 0.01471  | 0.011075 | 0.10212  | 0.100332 | 0.096745 | 0.092856 | 236.6417 |
| 322.2 | 5.9600 | 0.118343 | 0.105076 | 0.069321 | 0.040583 | 0.024724 | 0.014416 | 0.011213 | 0.098661 | 0.096586 | 0.09466  | 0.090403 | 230.8113 |
| 322.4 | 6.9200 | 0.11639  | 0.101723 | 0.071303 | 0.041471 | 0.022583 | 0.013322 | 0.01315  | 0.097719 | 0.093124 | 0.090273 | 0.08795  | 226.2423 |
| 322.6 | 7.5600 | 0.11253  | 0.102013 | 0.06899  | 0.042029 | 0.022789 | 0.014759 | 0.010509 | 0.093278 | 0.091313 | 0.088978 | 0.085125 | 221.295  |
| 322.8 | 7.8800 | 0.111254 | 0.099148 | 0.068384 | 0.039259 | 0.023342 | 0.014128 | 0.010088 | 0.090662 | 0.088872 | 0.085844 | 0.081511 | 215.7332 |
| 323.0 | 8.2000 | 0.110212 | 0.098207 | 0.069478 | 0.042088 | 0.022895 | 0.012896 | 0.012567 | 0.087698 | 0.085134 | 0.083317 | 0.080107 | 211.6302 |
| 323.2 | 7.2400 | 0.108085 | 0.099195 | 0.068696 | 0.0422   | 0.025036 | 0.01429  | 0.012429 | 0.085569 | 0.083408 | 0.080479 | 0.079215 | 207.1993 |
| 323.4 | 6.2800 | 0.107405 | 0.096179 | 0.067815 | 0.039612 | 0.021677 | 0.014985 | 0.010792 | 0.085467 | 0.08134  | 0.07944  | 0.076503 | 202.6851 |
| 323.6 | 6.1600 | 0.104761 | 0.094758 | 0.065555 | 0.039339 | 0.021794 | 0.013696 | 0.0101   | 0.080888 | 0.079418 | 0.077801 | 0.074585 | 197.0497 |
| 323.8 | 6.8800 | 0.102084 | 0.094192 | 0.067516 | 0.04148  | 0.022689 | 0.015326 | 0.012253 | 0.078385 | 0.07477  | 0.07472  | 0.072764 | 192.4785 |
| 324.0 | 7.6000 | 0.100454 | 0.091891 | 0.065877 | 0.04002  | 0.022383 | 0.012755 | 0.009706 | 0.077205 | 0.072659 | 0.070823 | 0.070332 | 188.0264 |
| 324.2 | 7.2800 | 0.099501 | 0.091257 | 0.064383 | 0.038791 | 0.02303  | 0.012787 | 0.011027 | 0.073895 | 0.071503 | 0.069218 | 0.066424 | 183.1731 |
| 324.4 | 6.9600 | 0.097204 | 0.089969 | 0.065689 | 0.039062 | 0.022177 | 0.015218 | 0.012348 | 0.073147 | 0.069846 | 0.068515 | 0.066216 | 180.6701 |
| 324.6 | 6.7200 | 0.097359 | 0.090242 | 0.065169 | 0.039615 | 0.022512 | 0.013441 | 0.010263 | 0.070201 | 0.067826 | 0.067124 | 0.065746 | 177.7698 |
| 324.8 | 6.5600 | 0.095893 | 0.088313 | 0.061922 | 0.03785  | 0.021736 | 0.012957 | 0.010474 | 0.068028 | 0.067231 | 0.063944 | 0.06372  | 173.0508 |
| 325.0 | 6.4000 | 0.094275 | 0.088363 | 0.064875 | 0.039686 | 0.023359 | 0.016473 | 0.012484 | 0.067368 | 0.065573 | 0.064301 | 0.059869 | 170.7673 |
| 325.2 | 6.3200 | 0.092783 | 0.088926 | 0.062602 | 0.038503 | 0.023571 | 0.013681 | 0.011489 | 0.065416 | 0.062388 | 0.060701 | 0.059856 | 166.4484 |
| 325.4 | 6.2400 | 0.088509 | 0.085064 | 0.059628 | 0.037921 | 0.020883 | 0.012088 | 0.008094 | 0.064272 | 0.06252  | 0.059512 | 0.058981 | 162.2351 |
| 325.6 | 6.4800 | 0.08788  | 0.084924 | 0.063649 | 0.038968 | 0.023347 | 0.014665 | 0.012579 | 0.059835 | 0.060008 | 0.058992 | 0.055462 | 158.7061 |
| 325.8 | 7.0400 | 0.087647 | 0.085219 | 0.060963 | 0.035844 | 0.021565 | 0.01341  | 0.011542 | 0.058857 | 0.05712  | 0.055273 | 0.054175 | 155.2039 |
| 326.0 | 7.6000 | 0.085173 | 0.082902 | 0.061377 | 0.03852  | 0.021383 | 0.014655 | 0.009506 | 0.058218 | 0.054902 | 0.054515 | 0.05339  | 152.8665 |
| 326.2 | 6.7200 | 0.085751 | 0.085131 | 0.063169 | 0.039715 | 0.024712 | 0.014541 | 0.012663 | 0.056295 | 0.053054 | 0.051194 | 0.050864 | 149.4411 |
| 326.4 | 5.8400 | 0.083553 | 0.084381 | 0.060161 | 0.037409 | 0.020842 | 0.013528 | 0.01102  | 0.053873 | 0.051069 | 0.051116 | 0.049231 | 144.5432 |
| 326.6 | 5.6400 | 0.081824 | 0.082397 | 0.062028 | 0.038654 | 0.022471 | 0.015247 | 0.010733 | 0.052404 | 0.053425 | 0.051393 | 0.047335 | 143.4215 |
| 326.8 | 6.1200 | 0.081862 | 0.082552 | 0.059868 | 0.036947 | 0.0214   | 0.0131   | 0.010902 | 0.050801 | 0.050622 | 0.050278 | 0.047627 | 141.4326 |



|       |        |          |          |          |          |          |          |          |          |          |          |          |          |
|-------|--------|----------|----------|----------|----------|----------|----------|----------|----------|----------|----------|----------|----------|
| 327.0 | 6.6000 | 0.080059 | 0.078999 | 0.060009 | 0.037641 | 0.02153  | 0.015053 | 0.011771 | 0.051247 | 0.047162 | 0.045296 | 0.045991 | 136.9113 |
| 327.2 | 7.5600 | 0.075195 | 0.07853  | 0.05969  | 0.037929 | 0.022189 | 0.013259 | 0.012209 | 0.048793 | 0.045155 | 0.042834 | 0.042213 | 131.913  |
| 327.4 | 8.5200 | 0.07772  | 0.080466 | 0.059771 | 0.036817 | 0.021848 | 0.014165 | 0.011946 | 0.045083 | 0.044031 | 0.042255 | 0.041339 | 131.6583 |
| 327.6 | 8.3200 | 0.076296 | 0.077119 | 0.058638 | 0.036861 | 0.021277 | 0.014085 | 0.011559 | 0.044619 | 0.044027 | 0.043015 | 0.041616 | 130.2441 |
| 327.8 | 6.9600 | 0.073022 | 0.07808  | 0.059089 | 0.035762 | 0.021677 | 0.013718 | 0.011848 | 0.043853 | 0.042745 | 0.041785 | 0.041964 | 126.7838 |
| 328.0 | 5.6000 | 0.076763 | 0.080862 | 0.059241 | 0.037662 | 0.023377 | 0.014851 | 0.012536 | 0.045779 | 0.041592 | 0.040119 | 0.038048 | 125.8521 |
| 328.2 | 5.1200 | 0.075016 | 0.075877 | 0.0591   | 0.037368 | 0.022847 | 0.015198 | 0.011967 | 0.04421  | 0.040733 | 0.039401 | 0.038117 | 122.3577 |
| 328.4 | 4.6400 | 0.07278  | 0.077049 | 0.05666  | 0.037575 | 0.020618 | 0.014145 | 0.010598 | 0.041606 | 0.041348 | 0.040696 | 0.040659 | 121.5654 |
| 328.6 | 5.2800 | 0.073997 | 0.077806 | 0.057347 | 0.036833 | 0.023024 | 0.014683 | 0.013057 | 0.039804 | 0.039638 | 0.03909  | 0.038148 | 120.0352 |
| 328.8 | 7.0400 | 0.072579 | 0.074955 | 0.059363 | 0.037244 | 0.022665 | 0.01471  | 0.010942 | 0.039054 | 0.036104 | 0.035804 | 0.03345  | 116.211  |
| 329.0 | 8.8000 | 0.067047 | 0.072759 | 0.055078 | 0.036455 | 0.021206 | 0.012538 | 0.010928 | 0.03655  | 0.033431 | 0.030273 | 0.032562 | 110.3581 |
| 329.2 | 7.2800 | 0.071017 | 0.073659 | 0.057783 | 0.035891 | 0.02353  | 0.016287 | 0.011827 | 0.036094 | 0.034965 | 0.034497 | 0.03419  | 113.5317 |
| 329.4 | 5.7600 | 0.068063 | 0.074056 | 0.054888 | 0.036627 | 0.020053 | 0.014936 | 0.010226 | 0.035426 | 0.036706 | 0.035127 | 0.033096 | 110.8402 |
| 329.6 | 5.3600 | 0.067901 | 0.07359  | 0.05552  | 0.035815 | 0.021312 | 0.012775 | 0.010252 | 0.036047 | 0.035095 | 0.03325  | 0.032458 | 108.969  |
| 329.8 | 6.0800 | 0.069141 | 0.071895 | 0.058881 | 0.035756 | 0.023806 | 0.015004 | 0.013605 | 0.034419 | 0.031508 | 0.02987  | 0.029865 | 106.0179 |
| 330.0 | 6.8000 | 0.065302 | 0.073009 | 0.055142 | 0.034997 | 0.0194   | 0.012634 | 0.009858 | 0.033141 | 0.029569 | 0.029572 | 0.031039 | 103.9154 |
| 330.2 | 7.3600 | 0.065678 | 0.070615 | 0.055356 | 0.036973 | 0.021418 | 0.013679 | 0.010922 | 0.031531 | 0.030411 | 0.030373 | 0.028851 | 103.5075 |
| 330.4 | 7.9200 | 0.067341 | 0.072217 | 0.057371 | 0.03585  | 0.022736 | 0.015624 | 0.012385 | 0.031194 | 0.030703 | 0.028833 | 0.027943 | 104.3537 |
| 330.6 | 7.9600 | 0.062943 | 0.07093  | 0.054457 | 0.035741 | 0.02243  | 0.01272  | 0.010883 | 0.0293   | 0.028075 | 0.027493 | 0.025418 | 98.8609  |
| 330.8 | 7.4800 | 0.062249 | 0.068256 | 0.054517 | 0.034747 | 0.0208   | 0.012167 | 0.008614 | 0.029742 | 0.027059 | 0.025468 | 0.026522 | 96.7907  |
| 331.0 | 7.0000 | 0.065545 | 0.072066 | 0.057176 | 0.035453 | 0.020971 | 0.016314 | 0.012045 | 0.029193 | 0.026486 | 0.027225 | 0.025865 | 98.823   |
| 331.2 | 6.3600 | 0.063348 | 0.071154 | 0.054788 | 0.036694 | 0.022365 | 0.012977 | 0.012487 | 0.030764 | 0.02841  | 0.027106 | 0.026792 | 98.6614  |
| 331.4 | 5.7200 | 0.062621 | 0.068601 | 0.055801 | 0.036536 | 0.022959 | 0.014539 | 0.009228 | 0.029632 | 0.028653 | 0.026612 | 0.02521  | 96.1757  |
| 331.6 | 6.2000 | 0.064382 | 0.07217  | 0.054742 | 0.03613  | 0.022489 | 0.016492 | 0.012297 | 0.028515 | 0.026074 | 0.02572  | 0.025084 | 96.142   |
| 331.8 | 7.8000 | 0.058916 | 0.067498 | 0.05441  | 0.035076 | 0.021253 | 0.013436 | 0.011393 | 0.025716 | 0.023887 | 0.024103 | 0.023863 | 91.4807  |
| 332.0 | 9.4000 | 0.058986 | 0.066119 | 0.053279 | 0.032523 | 0.018418 | 0.012279 | 0.007789 | 0.024598 | 0.024286 | 0.022398 | 0.02208  | 90.7273  |
| 332.2 | 7.7200 | 0.061778 | 0.069956 | 0.054937 | 0.034694 | 0.022565 | 0.013443 | 0.010998 | 0.026402 | 0.024692 | 0.023113 | 0.021712 | 92.4709  |
| 332.4 | 6.0400 | 0.059425 | 0.066951 | 0.054195 | 0.035465 | 0.020812 | 0.013908 | 0.011707 | 0.026043 | 0.024498 | 0.023219 | 0.020744 | 88.6689  |
| 332.6 | 5.2800 | 0.060219 | 0.06863  | 0.052747 | 0.034933 | 0.020224 | 0.012883 | 0.009957 | 0.025469 | 0.024305 | 0.023801 | 0.022799 | 88.9566  |
| 332.8 | 5.4400 | 0.060785 | 0.070285 | 0.054194 | 0.036198 | 0.0224   | 0.013067 | 0.009946 | 0.02466  | 0.022522 | 0.02324  | 0.023708 | 89.1076  |
| 333.0 | 5.6000 | 0.058383 | 0.067483 | 0.055341 | 0.035462 | 0.019877 | 0.013651 | 0.011036 | 0.02499  | 0.023535 | 0.020898 | 0.021536 | 86.6716  |
| 333.2 | 6.6400 | 0.057817 | 0.066383 | 0.050496 | 0.031933 | 0.018924 | 0.012849 | 0.009768 | 0.024748 | 0.02273  | 0.021555 | 0.02011  | 85.7022  |
| 333.4 | 7.6800 | 0.059107 | 0.06729  | 0.05465  | 0.037003 | 0.022971 | 0.014347 | 0.010001 | 0.023465 | 0.021337 | 0.020471 | 0.019608 | 86.7252  |
| 333.6 | 8.3600 | 0.055952 | 0.06471  | 0.054224 | 0.035252 | 0.022171 | 0.013981 | 0.009957 | 0.021937 | 0.020147 | 0.019827 | 0.01912  | 84.0042  |
| 333.8 | 8.6800 | 0.05516  | 0.064649 | 0.051118 | 0.032782 | 0.021124 | 0.012349 | 0.010936 | 0.019583 | 0.018365 | 0.017846 | 0.018388 | 80.7673  |
| 334.0 | 9.0000 | 0.056028 | 0.064546 | 0.054012 | 0.034411 | 0.020277 | 0.013218 | 0.010715 | 0.019425 | 0.019073 | 0.018224 | 0.017517 | 81.8508  |
| 334.2 | 8.3600 | 0.055454 | 0.066352 | 0.053924 | 0.035252 | 0.020971 | 0.013481 | 0.010257 | 0.022481 | 0.020144 | 0.019075 | 0.017686 | 83.5223  |
| 334.4 | 7.7200 | 0.056847 | 0.06507  | 0.052637 | 0.033794 | 0.020165 | 0.013943 | 0.011798 | 0.021742 | 0.020064 | 0.017542 | 0.019061 | 82.4319  |
| 334.6 | 7.8000 | 0.05478  | 0.066355 | 0.05531  | 0.036476 | 0.023153 | 0.015336 | 0.010993 | 0.019439 | 0.017885 | 0.016836 | 0.017936 | 80.2072  |
| 334.8 | 8.6000 | 0.054146 | 0.064701 | 0.050645 | 0.034799 | 0.021636 | 0.014457 | 0.011541 | 0.017559 | 0.018328 | 0.017688 | 0.015402 | 78.4914  |
| 335.0 | 9.4000 | 0.054158 | 0.062608 | 0.052479 | 0.032123 | 0.018518 | 0.011579 | 0.010589 | 0.018058 | 0.01871  | 0.016875 | 0.015724 | 78.8644  |
| 335.2 | 7.4800 | 0.0547   | 0.064775 | 0.053217 | 0.035047 | 0.0216   | 0.014267 | 0.011114 | 0.021728 | 0.017597 | 0.017404 | 0.018156 | 80.1996  |
| 335.4 | 5.5600 | 0.056241 | 0.06692  | 0.051954 | 0.035771 | 0.023083 | 0.014855 | 0.009239 | 0.021687 | 0.019895 | 0.017212 | 0.019084 | 80.3845  |

|       |        |          |          |          |          |          |          |          |          |          |          |          |         |
|-------|--------|----------|----------|----------|----------|----------|----------|----------|----------|----------|----------|----------|---------|
| 335.6 | 4.7600 | 0.05711  | 0.063578 | 0.05282  | 0.031348 | 0.0195   | 0.013634 | 0.010591 | 0.020725 | 0.018058 | 0.018139 | 0.017643 | 77.5596 |
| 335.8 | 5.0800 | 0.055689 | 0.066248 | 0.054713 | 0.035977 | 0.022053 | 0.015102 | 0.01257  | 0.019804 | 0.018515 | 0.017882 | 0.018215 | 78.5608 |
| 336.0 | 5.4000 | 0.055773 | 0.066252 | 0.051907 | 0.034907 | 0.020806 | 0.011371 | 0.009649 | 0.019977 | 0.020274 | 0.019031 | 0.017481 | 79.2739 |
| 336.2 | 6.4400 | 0.053109 | 0.061059 | 0.051762 | 0.031577 | 0.019353 | 0.011669 | 0.010181 | 0.020561 | 0.018435 | 0.017669 | 0.016294 | 76.5041 |
| 336.4 | 7.4800 | 0.053251 | 0.064668 | 0.051317 | 0.034447 | 0.0225   | 0.014567 | 0.011214 | 0.01884  | 0.017896 | 0.015945 | 0.015748 | 76.9434 |
| 336.6 | 7.4400 | 0.054652 | 0.063096 | 0.05203  | 0.035756 | 0.020406 | 0.013471 | 0.010516 | 0.018333 | 0.016223 | 0.015856 | 0.016193 | 76.3743 |
| 336.8 | 6.3200 | 0.053488 | 0.0623   | 0.052302 | 0.032003 | 0.021471 | 0.012881 | 0.008189 | 0.019539 | 0.016616 | 0.01624  | 0.016183 | 75.2378 |
| 337.0 | 5.2000 | 0.055565 | 0.06649  | 0.051374 | 0.035851 | 0.022536 | 0.01339  | 0.011462 | 0.019494 | 0.01935  | 0.018377 | 0.01701  | 78.1928 |
| 337.2 | 6.0000 | 0.054151 | 0.061624 | 0.052808 | 0.032774 | 0.022118 | 0.011412 | 0.00991  | 0.019763 | 0.016976 | 0.015524 | 0.015865 | 74.9699 |
| 337.4 | 6.8000 | 0.050266 | 0.061802 | 0.048642 | 0.031397 | 0.0194   | 0.012234 | 0.007458 | 0.01816  | 0.015547 | 0.014374 | 0.015313 | 71.8833 |
| 337.6 | 7.2000 | 0.053603 | 0.064205 | 0.05131  | 0.035809 | 0.020242 | 0.013994 | 0.011232 | 0.017913 | 0.014966 | 0.013919 | 0.015716 | 74.3659 |
| 337.8 | 7.2000 | 0.052567 | 0.060798 | 0.05131  | 0.034909 | 0.022342 | 0.012694 | 0.010132 | 0.017979 | 0.016746 | 0.015182 | 0.015298 | 74.2611 |
| 338.0 | 7.2000 | 0.050996 | 0.06138  | 0.04911  | 0.032209 | 0.020342 | 0.013194 | 0.008932 | 0.017626 | 0.015443 | 0.015157 | 0.01524  | 72.6419 |
| 338.2 | 6.5600 | 0.053418 | 0.061729 | 0.051622 | 0.03415  | 0.021836 | 0.012657 | 0.010974 | 0.016553 | 0.016745 | 0.015346 | 0.015159 | 73.5516 |
| 338.4 | 5.9200 | 0.053683 | 0.062071 | 0.049735 | 0.032592 | 0.02123  | 0.01252  | 0.009515 | 0.018312 | 0.015329 | 0.013768 | 0.015075 | 72.2309 |
| 338.6 | 5.6000 | 0.05087  | 0.062412 | 0.048941 | 0.033162 | 0.019377 | 0.012851 | 0.010136 | 0.018456 | 0.015578 | 0.014493 | 0.015767 | 71.5759 |
| 338.8 | 5.6000 | 0.053787 | 0.061014 | 0.051641 | 0.034762 | 0.022877 | 0.013551 | 0.009736 | 0.018605 | 0.018113 | 0.015954 | 0.015118 | 74.2217 |
| 339.0 | 5.6000 | 0.053006 | 0.06178  | 0.049741 | 0.034162 | 0.022077 | 0.013051 | 0.010536 | 0.017528 | 0.016944 | 0.016349 | 0.016108 | 73.4425 |
| 339.2 | 6.8000 | 0.049954 | 0.060988 | 0.049742 | 0.032097 | 0.0191   | 0.013334 | 0.011058 | 0.016665 | 0.015591 | 0.014094 | 0.014232 | 70.7443 |
| 339.4 | 8.0000 | 0.051027 | 0.059524 | 0.052644 | 0.034232 | 0.022124 | 0.013416 | 0.01038  | 0.017696 | 0.014369 | 0.011074 | 0.013229 | 70.9863 |
| 339.6 | 8.0000 | 0.05094  | 0.060353 | 0.048444 | 0.031932 | 0.020024 | 0.013316 | 0.00908  | 0.016863 | 0.013832 | 0.012889 | 0.013395 | 70.6022 |
| 339.8 | 6.8000 | 0.050124 | 0.058358 | 0.050342 | 0.032797 | 0.0209   | 0.011934 | 0.010358 | 0.017049 | 0.016072 | 0.016485 | 0.01311  | 71.1962 |
| 340.0 | 5.6000 | 0.05251  | 0.062231 | 0.050341 | 0.035562 | 0.021677 | 0.013751 | 0.010036 | 0.016273 | 0.016478 | 0.013871 | 0.016003 | 71.8465 |
| 340.2 | 6.1600 | 0.050426 | 0.062516 | 0.049555 | 0.031439 | 0.019294 | 0.012596 | 0.0091   | 0.015901 | 0.015118 | 0.014148 | 0.015648 | 70.5555 |
| 340.4 | 6.7200 | 0.049485 | 0.058174 | 0.050569 | 0.032215 | 0.019812 | 0.010641 | 0.009263 | 0.019206 | 0.013769 | 0.01323  | 0.012823 | 69.3801 |
| 340.6 | 7.3200 | 0.052094 | 0.062958 | 0.05077  | 0.033582 | 0.021124 | 0.015083 | 0.012524 | 0.017031 | 0.014442 | 0.014192 | 0.011934 | 71.6966 |
| 340.8 | 7.9600 | 0.0476   | 0.061711 | 0.048757 | 0.032241 | 0.01993  | 0.01472  | 0.009783 | 0.016605 | 0.01426  | 0.013571 | 0.012993 | 69.9598 |
| 341.0 | 8.6000 | 0.046284 | 0.057903 | 0.048945 | 0.031799 | 0.021536 | 0.010457 | 0.008441 | 0.015427 | 0.013345 | 0.012485 | 0.013582 | 68.1834 |
| 341.2 | 7.8000 | 0.051459 | 0.061598 | 0.05141  | 0.035176 | 0.021753 | 0.015136 | 0.012793 | 0.014316 | 0.014903 | 0.012829 | 0.012166 | 70.4965 |
| 341.4 | 7.0000 | 0.049187 | 0.059131 | 0.050576 | 0.031853 | 0.019771 | 0.013514 | 0.008345 | 0.015972 | 0.01357  | 0.013903 | 0.0114   | 68.1402 |
| 341.6 | 6.3600 | 0.050234 | 0.059375 | 0.049088 | 0.032694 | 0.020965 | 0.009977 | 0.008987 | 0.017259 | 0.014714 | 0.013339 | 0.012972 | 69.1049 |
| 341.8 | 5.8800 | 0.05366  | 0.064508 | 0.052548 | 0.036901 | 0.023636 | 0.015624 | 0.012818 | 0.016693 | 0.015724 | 0.014694 | 0.014893 | 73.3224 |
| 342.0 | 5.4000 | 0.04959  | 0.059839 | 0.051207 | 0.032207 | 0.021406 | 0.013571 | 0.009849 | 0.015248 | 0.015551 | 0.014047 | 0.014598 | 68.7318 |
| 342.2 | 6.6000 | 0.048168 | 0.060575 | 0.046509 | 0.031941 | 0.01803  | 0.010653 | 0.007671 | 0.015738 | 0.014794 | 0.012941 | 0.014171 | 68.1243 |
| 342.4 | 7.8000 | 0.051977 | 0.060441 | 0.05191  | 0.035376 | 0.021553 | 0.015136 | 0.011393 | 0.015055 | 0.014209 | 0.011798 | 0.011694 | 69.9239 |
| 342.6 | 7.8800 | 0.046333 | 0.059763 | 0.047784 | 0.030959 | 0.020242 | 0.010428 | 0.007788 | 0.015698 | 0.014018 | 0.013512 | 0.012999 | 68.2055 |
| 342.8 | 6.8400 | 0.050146 | 0.061782 | 0.049629 | 0.033888 | 0.021995 | 0.01413  | 0.010255 | 0.015712 | 0.014385 | 0.01351  | 0.012719 | 69.5907 |
| 343.0 | 5.8000 | 0.053047 | 0.060145 | 0.052274 | 0.035218 | 0.023247 | 0.016532 | 0.012623 | 0.015962 | 0.013673 | 0.014148 | 0.013308 | 70.0163 |
| 343.2 | 6.0400 | 0.048412 | 0.058978 | 0.048195 | 0.030365 | 0.017812 | 0.010908 | 0.010007 | 0.016038 | 0.014234 | 0.012608 | 0.013288 | 66.8825 |
| 343.4 | 6.2800 | 0.048015 | 0.059594 | 0.048415 | 0.031912 | 0.019477 | 0.011485 | 0.006592 | 0.015822 | 0.014276 | 0.013994 | 0.013161 | 67.6705 |
| 343.6 | 6.8400 | 0.053115 | 0.059832 | 0.053729 | 0.036788 | 0.023495 | 0.01443  | 0.012255 | 0.016873 | 0.01477  | 0.013427 | 0.011664 | 71.1683 |
| 343.8 | 7.7200 | 0.048518 | 0.060956 | 0.048837 | 0.031394 | 0.018865 | 0.012843 | 0.010998 | 0.014814 | 0.013046 | 0.012201 | 0.010654 | 67.1938 |
| 344.0 | 8.6000 | 0.048556 | 0.058721 | 0.048945 | 0.033499 | 0.020236 | 0.014457 | 0.010541 | 0.014258 | 0.013063 | 0.010641 | 0.012603 | 67.6989 |

|       |        |          |          |          |          |          |          |          |          |          |          |          |         |
|-------|--------|----------|----------|----------|----------|----------|----------|----------|----------|----------|----------|----------|---------|
| 344.2 | 8.4400 | 0.04933  | 0.059696 | 0.051898 | 0.033935 | 0.022159 | 0.016273 | 0.010751 | 0.015329 | 0.012903 | 0.009904 | 0.010501 | 67.8411 |
| 344.4 | 8.2800 | 0.046841 | 0.058327 | 0.049351 | 0.03167  | 0.018783 | 0.013889 | 0.010462 | 0.014928 | 0.013047 | 0.01346  | 0.011615 | 67.5393 |
| 344.6 | 8.0400 | 0.04906  | 0.056833 | 0.049631 | 0.032023 | 0.019318 | 0.013212 | 0.009477 | 0.013776 | 0.01296  | 0.013903 | 0.012469 | 67.7727 |
| 344.8 | 7.7200 | 0.048961 | 0.059662 | 0.050337 | 0.034894 | 0.020765 | 0.013143 | 0.009298 | 0.015516 | 0.012354 | 0.010659 | 0.013367 | 67.9178 |
| 345.0 | 7.4000 | 0.048105 | 0.057845 | 0.048443 | 0.032465 | 0.019112 | 0.013375 | 0.010219 | 0.014394 | 0.013215 | 0.011926 | 0.011928 | 66.3113 |
| 345.2 | 7.4800 | 0.047541 | 0.058258 | 0.047617 | 0.032247 | 0.0189   | 0.013567 | 0.009814 | 0.016661 | 0.012708 | 0.013876 | 0.011558 | 67.489  |
| 345.4 | 7.5600 | 0.048013 | 0.060855 | 0.05119  | 0.032629 | 0.019989 | 0.014359 | 0.009809 | 0.014486 | 0.014106 | 0.013036 | 0.012693 | 68.5959 |
| 345.6 | 7.1200 | 0.049675 | 0.058483 | 0.049836 | 0.029426 | 0.019553 | 0.013002 | 0.010137 | 0.013992 | 0.012262 | 0.012126 | 0.012446 | 66.4437 |
| 345.8 | 6.1600 | 0.050214 | 0.060208 | 0.047855 | 0.035039 | 0.018994 | 0.013196 | 0.0104   | 0.016375 | 0.014095 | 0.012087 | 0.012895 | 67.9951 |
| 346.0 | 5.2000 | 0.048482 | 0.06129  | 0.050374 | 0.033251 | 0.021836 | 0.01199  | 0.009462 | 0.016435 | 0.015081 | 0.013573 | 0.010921 | 67.1749 |
| 346.2 | 6.1600 | 0.048991 | 0.057595 | 0.049655 | 0.032139 | 0.020894 | 0.013896 | 0.0098   | 0.016075 | 0.013861 | 0.014286 | 0.012995 | 67.7456 |
| 346.4 | 7.1200 | 0.047455 | 0.057523 | 0.045936 | 0.030326 | 0.016553 | 0.010902 | 0.008137 | 0.012841 | 0.012631 | 0.013396 | 0.011911 | 64.8215 |
| 346.6 | 7.4000 | 0.04903  | 0.06059  | 0.050243 | 0.033465 | 0.021412 | 0.013975 | 0.012319 | 0.013762 | 0.012745 | 0.011291 | 0.011517 | 66.823  |
| 346.8 | 7.0000 | 0.049634 | 0.057312 | 0.051576 | 0.033053 | 0.022271 | 0.014314 | 0.010045 | 0.01586  | 0.014575 | 0.012012 | 0.008966 | 66.948  |
| 347.0 | 6.6000 | 0.049712 | 0.059478 | 0.048009 | 0.032341 | 0.01993  | 0.012053 | 0.010771 | 0.015679 | 0.01493  | 0.013615 | 0.011793 | 68.1847 |
| 347.2 | 6.6800 | 0.048762 | 0.059021 | 0.049382 | 0.032824 | 0.021918 | 0.014645 | 0.012066 | 0.014111 | 0.012653 | 0.013823 | 0.014032 | 67.5299 |
| 347.4 | 6.7600 | 0.046951 | 0.057012 | 0.047156 | 0.029706 | 0.019006 | 0.012838 | 0.008461 | 0.01419  | 0.013061 | 0.012513 | 0.013253 | 65.2736 |
| 347.6 | 6.9200 | 0.04599  | 0.05783  | 0.047203 | 0.031871 | 0.019083 | 0.010922 | 0.00835  | 0.015501 | 0.014164 | 0.012068 | 0.010529 | 65.1781 |
| 347.8 | 7.1600 | 0.048594 | 0.057858 | 0.049923 | 0.031318 | 0.021047 | 0.013898 | 0.011735 | 0.01583  | 0.013616 | 0.012833 | 0.012147 | 67.619  |
| 348.0 | 7.4000 | 0.050025 | 0.059646 | 0.047543 | 0.032565 | 0.020612 | 0.014375 | 0.010919 | 0.013215 | 0.012012 | 0.011717 | 0.013032 | 66.7457 |
| 348.2 | 7.6400 | 0.044572 | 0.057414 | 0.046764 | 0.032112 | 0.018977 | 0.012251 | 0.009003 | 0.011638 | 0.011368 | 0.013595 | 0.011677 | 63.6381 |
| 348.4 | 7.8800 | 0.047469 | 0.058462 | 0.048784 | 0.031959 | 0.020342 | 0.014228 | 0.010988 | 0.013528 | 0.01204  | 0.01092  | 0.010265 | 64.9793 |
| 348.6 | 7.5200 | 0.048176 | 0.058872 | 0.048903 | 0.032438 | 0.020395 | 0.012763 | 0.012311 | 0.015431 | 0.014155 | 0.013245 | 0.011237 | 67.8446 |
| 348.8 | 6.5600 | 0.045449 | 0.056402 | 0.048422 | 0.03105  | 0.020036 | 0.011857 | 0.007374 | 0.015485 | 0.01383  | 0.011233 | 0.011368 | 64.2898 |
| 349.0 | 5.6000 | 0.050625 | 0.060659 | 0.048841 | 0.032562 | 0.020777 | 0.014351 | 0.012136 | 0.014744 | 0.013465 | 0.013383 | 0.013133 | 67.4302 |
| 349.2 | 6.0000 | 0.048986 | 0.060151 | 0.049008 | 0.032974 | 0.020718 | 0.011712 | 0.01061  | 0.014756 | 0.013345 | 0.0131   | 0.010517 | 65.9961 |
| 349.4 | 6.4000 | 0.045642 | 0.055154 | 0.048775 | 0.031486 | 0.020759 | 0.012473 | 0.008584 | 0.014092 | 0.015249 | 0.013413 | 0.012544 | 65.2999 |
| 349.6 | 6.8800 | 0.048949 | 0.059653 | 0.047416 | 0.03018  | 0.020189 | 0.014426 | 0.009753 | 0.016503 | 0.013962 | 0.011896 | 0.0126   | 67.6614 |
| 349.8 | 7.4400 | 0.047828 | 0.05845  | 0.04873  | 0.031356 | 0.021206 | 0.010371 | 0.009316 | 0.014836 | 0.010891 | 0.009877 | 0.011228 | 64.5751 |
| 350.0 | 8.0000 | 0.043946 | 0.055182 | 0.046544 | 0.031632 | 0.018424 | 0.011716 | 0.01018  | 0.014455 | 0.01188  | 0.011101 | 0.009263 | 62.7131 |

**Table 4-S.** Absorbance as a function of wavelength for (*p*-phenolyl) ethylguanidine (free base), in dimethylsulfoxide at the indicated concentrations, pathlengths, and temperatures.

| Temp C           | 45       | 39.5     | 34       | 29       | 24       | 19       | 20.5     | 20.5     | 20.5     | 20.5     | 20.5     | 20.5     |
|------------------|----------|----------|----------|----------|----------|----------|----------|----------|----------|----------|----------|----------|
| Pathlength (cm)  | 0.095    | 0.095    | 0.095    | 0.095    | 0.095    | 0.095    | 0.095    | 0.095    | 0.095    | 0.095    | 0.095    | 0.5      |
| conc (M)         | 0.005    | 0.005    | 0.005    | 0.005    | 0.005    | 0.005    | 0.01     | 0.005    | 0.002    | 0.001    | 0.0005   | 0.0001   |
| $\lambda$ (nm) ↓ |          |          |          |          |          |          |          |          |          |          |          |          |
| 253              | 0.340176 | 0.30134  | 0.299117 | 0.31749  | 0.321684 | 0.367921 | 1.902755 | 0.587053 | 0.103447 | 0.025784 | 0.000405 | 0.012444 |
| 253.1            | 0.341782 | 0.304789 | 0.304176 | 0.323903 | 0.328957 | 0.37544  | 1.90361  | 0.587575 | 0.104301 | 0.026271 | 0.001381 | 0.01464  |
| 253.2            | 0.343753 | 0.307995 | 0.309106 | 0.32871  | 0.337464 | 0.384071 | 1.904085 | 0.58805  | 0.105156 | 0.026638 | 0.002235 | 0.01342  |
| 253.3            | 0.343506 | 0.307995 | 0.311695 | 0.332163 | 0.342518 | 0.391224 | 1.904085 | 0.588288 | 0.105887 | 0.027248 | -0.01143 | 0.01342  |
| 253.4            | 0.343506 | 0.309477 | 0.314284 | 0.337093 | 0.347824 | 0.395661 | 1.91843  | 0.588905 | 0.106742 | 0.028102 | 0.002479 | 0.014152 |
| 253.5            | 0.343135 | 0.312189 | 0.318355 | 0.342029 | 0.353248 | 0.404539 | 1.919475 | 0.58976  | 0.107474 | 0.028834 | 0.003577 | 0.011956 |
| 253.6            | 0.342888 | 0.31416  | 0.321561 | 0.346959 | 0.358796 | 0.410457 | 1.920235 | 0.59071  | 0.108327 | 0.029444 | 0.004553 | 0.01098  |
| 253.7            | 0.343876 | 0.317737 | 0.325874 | 0.350659 | 0.365327 | 0.417606 | 1.920615 | 0.591708 | 0.10906  | 0.030054 | 0.005529 | 0.010248 |
| 253.8            | 0.344247 | 0.319708 | 0.329574 | 0.354972 | 0.37088  | 0.424759 | 1.92052  | 0.592325 | 0.110035 | 0.030543 | 0.004797 | 0.011468 |
| 253.9            | 0.346218 | 0.321684 | 0.332904 | 0.359532 | 0.377535 | 0.429077 | 1.92147  | 0.593038 | 0.11089  | 0.03103  | 0.005529 | 0.01464  |
| 254              | 0.34733  | 0.323903 | 0.336234 | 0.364097 | 0.382959 | 0.436226 | 1.92204  | 0.593513 | 0.111743 | 0.031884 | 0.006261 | 0.016104 |
| 254.1            | 0.347577 | 0.325627 | 0.339193 | 0.369151 | 0.387401 | 0.44128  | 1.922325 | 0.593893 | 0.112474 | 0.032494 | 0.006871 | 0.017812 |
| 254.2            | 0.348683 | 0.328092 | 0.342518 | 0.373963 | 0.392578 | 0.447322 | 1.922325 | 0.594273 | 0.113329 | 0.033348 | 0.006383 | 0.016348 |
| 254.3            | 0.349671 | 0.330068 | 0.345477 | 0.378029 | 0.396031 | 0.453858 | 1.923085 | 0.594748 | 0.114061 | 0.023833 | 0.007237 | 0.011956 |
| 254.4            | 0.350536 | 0.332286 | 0.348807 | 0.381482 | 0.400715 | 0.458047 | 1.92337  | 0.595128 | 0.114792 | 0.024443 | 0.007847 | 0.011956 |
| 254.5            | 0.352013 | 0.334628 | 0.352137 | 0.385429 | 0.406016 | 0.46446  | 1.92337  | 0.595508 | 0.115404 | 0.02493  | 0.008701 | 0.010492 |
| 254.6            | 0.35226  | 0.335987 | 0.354355 | 0.388507 | 0.410087 | 0.467913 | 1.923085 | 0.595745 | 0.115769 | 0.025418 | 0.008335 | 0.0122   |
| 254.7            | 0.352878 | 0.337958 | 0.356944 | 0.392084 | 0.415635 | 0.47272  | 1.92337  | 0.59584  | 0.1165   | 0.036154 | 0.009067 | 0.014884 |
| 254.8            | 0.353001 | 0.339069 | 0.358796 | 0.395167 | 0.419211 | 0.47728  | 1.92356  | 0.596078 | 0.117234 | 0.03652  | 0.009799 | 0.01586  |
| 254.9            | 0.352754 | 0.3403   | 0.36052  | 0.397879 | 0.422541 | 0.479845 | 1.92337  | 0.596695 | 0.117965 | 0.036764 | 0.010653 | 0.017324 |
| 255              | 0.353737 | 0.342029 | 0.363356 | 0.401085 | 0.426607 | 0.486163 | 1.92318  | 0.59717  | 0.118818 | 0.037252 | 0.010775 | 0.016592 |
| 255.1            | 0.354108 | 0.343259 | 0.365574 | 0.403551 | 0.429196 | 0.489583 | 1.92337  | 0.597693 | 0.119552 | 0.037741 | 0.011507 | 0.016104 |
| 255.2            | 0.354849 | 0.344741 | 0.368168 | 0.40688  | 0.43302  | 0.494143 | 1.92356  | 0.59831  | 0.120283 | 0.038472 | 0.012361 | 0.0122   |
| 255.3            | 0.354972 | 0.345848 | 0.370386 | 0.409469 | 0.436473 | 0.498465 | 1.923275 | 0.598405 | 0.120893 | 0.039082 | 0.013215 | 0.010248 |
| 255.4            | 0.355096 | 0.347453 | 0.372357 | 0.412305 | 0.439309 | 0.501078 | 1.922705 | 0.598405 | 0.121382 | 0.039692 | 0.013093 | 0.01342  |
| 255.5            | 0.355096 | 0.34856  | 0.374205 | 0.415017 | 0.443256 | 0.505258 | 1.92242  | 0.598548 | 0.121748 | 0.04018  | 0.013459 | 0.012688 |
| 255.6            | 0.35559  | 0.350289 | 0.376552 | 0.417853 | 0.446581 | 0.50844  | 1.92204  | 0.598643 | 0.12248  | 0.04079  | 0.013947 | 0.016104 |
| 255.7            | 0.356578 | 0.352013 | 0.378646 | 0.420689 | 0.449787 | 0.512145 | 1.921375 | 0.598785 | 0.122968 | 0.041278 | 0.021877 | 0.017568 |
| 255.8            | 0.357438 | 0.353737 | 0.380988 | 0.423277 | 0.453487 | 0.516325 | 1.91292  | 0.59888  | 0.123454 | 0.041644 | 0.014069 | 0.01586  |
| 255.9            | 0.35892  | 0.35596  | 0.3837   | 0.426607 | 0.457435 | 0.519698 | 1.91216  | 0.598785 | 0.123943 | 0.041766 | 0.014435 | 0.016592 |
| 256              | 0.359779 | 0.357685 | 0.385059 | 0.428707 | 0.460764 | 0.523878 | 1.911495 | 0.598785 | 0.124553 | 0.042133 | 0.015045 | 0.016836 |
| 256.1            | 0.36052  | 0.35929  | 0.387401 | 0.431666 | 0.463966 | 0.52706  | 1.90342  | 0.598643 | 0.124919 | 0.042376 | 0.007847 | 0.016104 |
| 256.2            | 0.361755 | 0.361385 | 0.389989 | 0.434255 | 0.467296 | 0.530908 | 1.902945 | 0.599023 | 0.125529 | 0.042741 | 0.008579 | 0.018056 |
| 256.3            | 0.361879 | 0.362492 | 0.39159  | 0.436102 | 0.469148 | 0.533995 | 1.902375 | 0.599498 | 0.126261 | 0.043351 | 0.015898 | 0.018056 |
| 256.4            | 0.362373 | 0.36348  | 0.394302 | 0.438938 | 0.471613 | 0.535943 | 1.89506  | 0.59318  | 0.126994 | 0.04384  | 0.016387 | 0.0183   |
| 256.5            | 0.362615 | 0.364962 | 0.396031 | 0.441156 | 0.474202 | 0.539268 | 1.894775 | 0.593798 | 0.127726 | 0.044327 | 0.016874 | 0.020252 |
| 256.6            | 0.363356 | 0.365821 | 0.397509 | 0.443622 | 0.476663 | 0.541263 | 1.89411  | 0.593893 | 0.128579 | 0.044938 | 0.017362 | 0.0183   |
| 256.7            | 0.364468 | 0.367303 | 0.399608 | 0.446215 | 0.479845 | 0.544208 | 1.893255 | 0.594035 | 0.129067 | 0.045425 | 0.017241 | 0.021472 |
| 256.8            | 0.365574 | 0.369028 | 0.401456 | 0.448557 | 0.482553 | 0.547438 | 1.892495 | 0.600495 | 0.129555 | 0.045669 | 0.017606 | 0.020984 |
| 256.9            | 0.366809 | 0.370386 | 0.40318  | 0.450775 | 0.485023 | 0.54929  | 1.89164  | 0.600353 | 0.130165 | 0.046158 | 0.017972 | 0.02196  |
| 257              | 0.36755  | 0.371987 | 0.405156 | 0.452499 | 0.487113 | 0.552473 | 1.890785 | 0.600353 | 0.130775 | 0.046523 | 0.024316 | 0.020008 |
| 257.1            | 0.368287 | 0.372975 | 0.406633 | 0.453981 | 0.489108 | 0.554088 | 1.883755 | 0.600258 | 0.131263 | 0.046645 | 0.018338 | 0.017812 |

|       |          |          |          |          |          |          |          |          |          |          |          |
|-------|----------|----------|----------|----------|----------|----------|----------|----------|----------|----------|----------|
| 257.2 | 0.369151 | 0.374329 | 0.408239 | 0.455829 | 0.49134  | 0.55632  | 1.8829   | 0.600258 | 0.131752 | 0.047255 | 0.018826 |
| 257.3 | 0.371246 | 0.376799 | 0.411075 | 0.458171 | 0.494285 | 0.559645 | 1.88214  | 0.600495 | 0.132483 | 0.047743 | 0.024926 |
| 257.4 | 0.372481 | 0.37877  | 0.413046 | 0.460147 | 0.49685  | 0.561118 | 1.87549  | 0.600495 | 0.13285  | 0.048109 | 0.019314 |
| 257.5 | 0.373839 | 0.380618 | 0.415264 | 0.462489 | 0.499558 | 0.564538 | 1.874825 | 0.600733 | 0.133703 | 0.048719 | 0.019924 |
| 257.6 | 0.374699 | 0.381853 | 0.416746 | 0.46446  | 0.501695 | 0.56639  | 1.87397  | 0.60097  | 0.134313 | 0.04933  | 0.025658 |
| 257.7 | 0.374946 | 0.382712 | 0.417606 | 0.466189 | 0.503168 | 0.568005 | 1.86751  | 0.600875 | 0.13468  | 0.049573 | 0.020412 |
| 257.8 | 0.375811 | 0.383947 | 0.419211 | 0.468284 | 0.50502  | 0.570333 | 1.866845 | 0.60097  | 0.135411 | 0.050183 | 0.021144 |
| 257.9 | 0.376675 | 0.385182 | 0.420812 | 0.470131 | 0.506588 | 0.57133  | 1.865705 | 0.600733 | 0.135778 | 0.050671 | 0.026634 |
| 258   | 0.377782 | 0.386536 | 0.422788 | 0.47186  | 0.508725 | 0.5738   | 1.859625 | 0.600495 | 0.136388 | 0.051158 | 0.021876 |
| 258.1 | 0.37877  | 0.387648 | 0.424389 | 0.473585 | 0.510815 | 0.575415 | 1.85858  | 0.600495 | 0.137119 | 0.051647 | 0.022363 |
| 258.2 | 0.37914  | 0.388265 | 0.425253 | 0.475048 | 0.51167  | 0.57665  | 1.85744  | 0.600115 | 0.137608 | 0.051891 | 0.027244 |
| 258.3 | 0.38     | 0.389619 | 0.426731 | 0.47652  | 0.513523 | 0.57874  | 1.851455 | 0.60002  | 0.138096 | 0.052135 | 0.022363 |
| 258.4 | 0.380741 | 0.390607 | 0.427472 | 0.477993 | 0.514758 | 0.579358 | 1.850315 | 0.599783 | 0.138706 | 0.052378 | 0.022608 |
| 258.5 | 0.381729 | 0.391467 | 0.42883  | 0.47899  | 0.51623  | 0.58159  | 1.84927  | 0.59964  | 0.139316 | 0.052867 | 0.027609 |
| 258.6 | 0.383083 | 0.393319 | 0.430554 | 0.4807   | 0.518558 | 0.583443 | 1.843475 | 0.59964  | 0.139926 | 0.053232 | 0.023218 |
| 258.7 | 0.384071 | 0.394426 | 0.432032 | 0.482458 | 0.52003  | 0.58501  | 1.84243  | 0.599498 | 0.140535 | 0.053721 | 0.027975 |
| 258.8 | 0.385306 | 0.395908 | 0.434008 | 0.48393  | 0.521883 | 0.5871   | 1.83692  | 0.59964  | 0.136754 | 0.054208 | 0.028341 |
| 258.9 | 0.386536 | 0.398003 | 0.435855 | 0.485878 | 0.52364  | 0.588098 | 1.83141  | 0.59964  | 0.137608 | 0.054819 | 0.024193 |
| 259   | 0.387401 | 0.399114 | 0.437337 | 0.486875 | 0.52497  | 0.589333 | 1.830175 | 0.599403 | 0.137974 | 0.055062 | 0.028585 |
| 259.1 | 0.388507 | 0.400344 | 0.438568 | 0.48773  | 0.526443 | 0.590093 | 1.824855 | 0.59926  | 0.138584 | 0.05555  | 0.024559 |
| 259.2 | 0.389125 | 0.401209 | 0.439679 | 0.48887  | 0.527345 | 0.59071  | 1.823715 | 0.599023 | 0.143708 | 0.055916 | 0.028951 |
| 259.3 | 0.389866 | 0.402073 | 0.440544 | 0.48982  | 0.528295 | 0.591945 | 1.81849  | 0.598928 | 0.144318 | 0.056282 | 0.029195 |
| 259.4 | 0.390607 | 0.402814 | 0.441403 | 0.49096  | 0.52915  | 0.592278 | 1.81336  | 0.598928 | 0.145293 | 0.05677  | 0.029195 |
| 259.5 | 0.391224 | 0.403921 | 0.442638 | 0.49229  | 0.530385 | 0.593655 | 1.808325 | 0.598785 | 0.145903 | 0.05738  | 0.029561 |
| 259.6 | 0.392331 | 0.40528  | 0.443745 | 0.493905 | 0.531763 | 0.594748 | 1.803385 | 0.598785 | 0.146758 | 0.057867 | 0.025778 |
| 259.7 | 0.393319 | 0.406386 | 0.44498  | 0.495283 | 0.532855 | 0.595745 | 1.802245 | 0.598405 | 0.147246 | 0.058234 | 0.029926 |
| 259.8 | 0.394549 | 0.407745 | 0.446457 | 0.496518 | 0.534233 | 0.597218 | 1.797495 | 0.598548 | 0.148099 | 0.058966 | 0.02651  |
| 259.9 | 0.395414 | 0.408852 | 0.447445 | 0.49761  | 0.53485  | 0.597598 | 1.796545 | 0.598405 | 0.148831 | 0.059575 | 0.030536 |
| 260   | 0.396402 | 0.409716 | 0.448433 | 0.498465 | 0.535705 | 0.598833 | 1.791795 | 0.598168 | 0.149564 | 0.060185 | 0.030902 |
| 260.1 | 0.397262 | 0.410828 | 0.449417 | 0.499463 | 0.536465 | 0.599593 | 1.787045 | 0.598168 | 0.150296 | 0.060674 | 0.031146 |
| 260.2 | 0.398003 | 0.411692 | 0.450158 | 0.50046  | 0.537083 | 0.600068 | 1.78239  | 0.59793  | 0.150906 | 0.061284 | 0.031512 |
| 260.3 | 0.399238 | 0.412922 | 0.451393 | 0.501553 | 0.538175 | 0.601303 | 1.77764  | 0.597693 | 0.151516 | 0.061771 | 0.031634 |
| 260.4 | 0.400838 | 0.414647 | 0.453117 | 0.503168 | 0.53979  | 0.60192  | 1.77308  | 0.59755  | 0.152125 | 0.062259 | 0.032122 |
| 260.5 | 0.40232  | 0.416499 | 0.454846 | 0.50426  | 0.5415   | 0.60363  | 1.768615 | 0.597455 | 0.15298  | 0.062869 | 0.032244 |
| 260.6 | 0.404045 | 0.418223 | 0.456694 | 0.505875 | 0.542973 | 0.604865 | 1.76415  | 0.594035 | 0.15359  | 0.063356 | 0.032732 |
| 260.7 | 0.405774 | 0.419952 | 0.458541 | 0.507205 | 0.54473  | 0.606243 | 1.75978  | 0.593893 | 0.154322 | 0.063966 | 0.032854 |
| 260.8 | 0.407004 | 0.421059 | 0.459653 | 0.508203 | 0.545585 | 0.60724  | 1.755505 | 0.593893 | 0.155053 | 0.064283 | 0.03322  |
| 260.9 | 0.408486 | 0.422294 | 0.460888 | 0.509675 | 0.546535 | 0.607573 | 1.751135 | 0.593655 | 0.155787 | 0.064771 | 0.033342 |
| 261   | 0.409593 | 0.423401 | 0.461995 | 0.51053  | 0.547438 | 0.608475 | 1.74686  | 0.596838 | 0.156518 | 0.065137 | 0.033585 |
| 261.1 | 0.410828 | 0.424759 | 0.462983 | 0.511765 | 0.54815  | 0.609045 | 1.742585 | 0.596695 | 0.15725  | 0.065624 | 0.03383  |
| 261.2 | 0.411934 | 0.425994 | 0.464213 | 0.512905 | 0.549148 | 0.609948 | 1.7385   | 0.5966   | 0.157981 | 0.066529 | 0.034195 |
| 261.3 | 0.413046 | 0.427101 | 0.465448 | 0.51414  | 0.550003 | 0.610898 | 1.73432  | 0.5966   | 0.158715 | 0.06726  | 0.034439 |
| 261.4 | 0.414157 | 0.428336 | 0.466802 | 0.515375 | 0.550763 | 0.610898 | 1.730425 | 0.596695 | 0.159568 | 0.06787  | 0.035049 |

|       |          |          |          |          |          |          |          |          |          |          |          |
|-------|----------|----------|----------|----------|----------|----------|----------|----------|----------|----------|----------|
| 261.5 | 0.415264 | 0.429443 | 0.468284 | 0.516325 | 0.551618 | 0.611895 | 1.72634  | 0.596695 | 0.160299 | 0.068358 | 0.035293 |
| 261.6 | 0.416623 | 0.430925 | 0.469637 | 0.517703 | 0.552473 | 0.612655 | 1.722445 | 0.596695 | 0.160909 | 0.068846 | 0.035659 |
| 261.7 | 0.417853 | 0.432279 | 0.470996 | 0.518795 | 0.553565 | 0.613368 | 1.71855  | 0.596695 | 0.161764 | 0.069455 | 0.036025 |
| 261.8 | 0.419335 | 0.433884 | 0.472354 | 0.52003  | 0.554705 | 0.614603 | 1.71456  | 0.5966   | 0.162252 | 0.069944 | 0.036147 |
| 261.9 | 0.420812 | 0.435485 | 0.473461 | 0.52155  | 0.555798 | 0.614983 | 1.710665 | 0.596695 | 0.162984 | 0.070675 | 0.036269 |
| 262   | 0.422665 | 0.437214 | 0.475048 | 0.522643 | 0.557175 | 0.61636  | 1.70677  | 0.5966   | 0.163715 | 0.071164 | 0.039197 |
| 262.1 | 0.424389 | 0.438691 | 0.476283 | 0.523735 | 0.558268 | 0.616978 | 1.70012  | 0.5966   | 0.164325 | 0.071651 | 0.036634 |
| 262.2 | 0.426237 | 0.440173 | 0.477613 | 0.52459  | 0.55936  | 0.617833 | 1.69651  | 0.596695 | 0.16518  | 0.072262 | 0.039684 |
| 262.3 | 0.427719 | 0.441527 | 0.479133 | 0.52573  | 0.5605   | 0.619068 | 1.690145 | 0.596838 | 0.16579  | 0.072749 | 0.037366 |
| 262.4 | 0.429319 | 0.443132 | 0.4807   | 0.526965 | 0.561498 | 0.619305 | 1.686345 | 0.59698  | 0.1664   | 0.073237 | 0.037488 |
| 262.5 | 0.430554 | 0.44461  | 0.482078 | 0.528058 | 0.562115 | 0.620398 | 1.682545 | 0.59698  | 0.166888 | 0.073603 | 0.04005  |
| 262.6 | 0.432155 | 0.446092 | 0.48355  | 0.529435 | 0.563303 | 0.621158 | 1.676465 | 0.597075 | 0.167498 | 0.074213 | 0.037854 |
| 262.7 | 0.433761 | 0.447445 | 0.484785 | 0.530528 | 0.5643   | 0.62187  | 1.672855 | 0.597075 | 0.168108 | 0.0747   | 0.040416 |
| 262.8 | 0.434991 | 0.448557 | 0.485783 | 0.531525 | 0.564918 | 0.62263  | 1.66687  | 0.597313 | 0.168718 | 0.07531  | 0.038342 |
| 262.9 | 0.436349 | 0.449787 | 0.486875 | 0.532855 | 0.565915 | 0.622868 | 1.66345  | 0.597455 | 0.16945  | 0.07592  | 0.038708 |
| 263   | 0.438321 | 0.451763 | 0.48849  | 0.53447  | 0.56715  | 0.624245 | 1.660125 | 0.597835 | 0.170305 | 0.07653  | 0.041514 |
| 263.1 | 0.439679 | 0.45324  | 0.489963 | 0.535563 | 0.56791  | 0.62472  | 1.654425 | 0.597835 | 0.171036 | 0.07714  | 0.039561 |
| 263.2 | 0.441527 | 0.455093 | 0.491815 | 0.537083 | 0.569098 | 0.625718 | 1.6511   | 0.598073 | 0.171891 | 0.077872 | 0.042246 |
| 263.3 | 0.443379 | 0.456817 | 0.493525 | 0.538318 | 0.570238 | 0.62681  | 1.645495 | 0.598168 | 0.172623 | 0.078482 | 0.040171 |
| 263.4 | 0.444733 | 0.457929 | 0.494665 | 0.53941  | 0.571093 | 0.62681  | 1.642075 | 0.598168 | 0.173354 | 0.07897  | 0.040415 |
| 263.5 | 0.446581 | 0.459653 | 0.495995 | 0.540883 | 0.572185 | 0.62795  | 1.63894  | 0.59869  | 0.174209 | 0.079702 | 0.042977 |
| 263.6 | 0.448557 | 0.461624 | 0.497753 | 0.542355 | 0.573705 | 0.6289   | 1.63343  | 0.5966   | 0.175062 | 0.08019  | 0.041025 |
| 263.7 | 0.450405 | 0.463477 | 0.49932  | 0.543733 | 0.575178 | 0.629898 | 1.6302   | 0.597075 | 0.175917 | 0.080799 | 0.043587 |
| 263.8 | 0.452499 | 0.465571 | 0.501315 | 0.545063 | 0.576413 | 0.631513 | 1.624975 | 0.597313 | 0.176892 | 0.081409 | 0.043953 |
| 263.9 | 0.454352 | 0.467296 | 0.503025 | 0.54644  | 0.577505 | 0.63213  | 1.61975  | 0.597598 | 0.177869 | 0.079945 | 0.042123 |
| 264   | 0.455953 | 0.468778 | 0.50464  | 0.547675 | 0.57874  | 0.633365 | 1.616615 | 0.600258 | 0.178478 | 0.080555 | 0.044441 |
| 264.1 | 0.457682 | 0.470378 | 0.506255 | 0.549148 | 0.579595 | 0.634078 | 1.611485 | 0.600495 | 0.179577 | 0.081165 | 0.042733 |
| 264.2 | 0.459529 | 0.471984 | 0.507585 | 0.550525 | 0.58083  | 0.634695 | 1.608445 | 0.60097  | 0.18043  | 0.081775 | 0.042855 |
| 264.3 | 0.461254 | 0.473585 | 0.5092   | 0.551998 | 0.582065 | 0.635835 | 1.6055   | 0.601588 | 0.181406 | 0.084459 | 0.045295 |
| 264.4 | 0.463353 | 0.475665 | 0.51091  | 0.553708 | 0.583443 | 0.636548 | 1.600465 | 0.60211  | 0.182261 | 0.084947 | 0.043586 |
| 264.5 | 0.465448 | 0.477613 | 0.512763 | 0.555323 | 0.584773 | 0.63802  | 1.59752  | 0.602585 | 0.183236 | 0.085435 | 0.045904 |
| 264.6 | 0.467543 | 0.479465 | 0.514758 | 0.557033 | 0.58615  | 0.639255 | 1.59258  | 0.603203 | 0.184213 | 0.085923 | 0.044196 |
| 264.7 | 0.469884 | 0.481698 | 0.516468 | 0.558505 | 0.587623 | 0.64049  | 1.589635 | 0.603535 | 0.185066 | 0.086533 | 0.044318 |
| 264.8 | 0.47149  | 0.48317  | 0.517703 | 0.559645 | 0.588335 | 0.641488 | 1.586785 | 0.604058 | 0.186042 | 0.087143 | 0.044806 |
| 264.9 | 0.473461 | 0.484928 | 0.519413 | 0.560975 | 0.589475 | 0.641868 | 1.58403  | 0.604533 | 0.187019 | 0.087997 | 0.04505  |
| 265   | 0.475285 | 0.486875 | 0.521028 | 0.562685 | 0.59071  | 0.643245 | 1.58118  | 0.60515  | 0.187872 | 0.088607 | 0.047368 |
| 265.1 | 0.476995 | 0.48849  | 0.522738 | 0.564205 | 0.591945 | 0.643815 | 1.576525 | 0.605625 | 0.18897  | 0.089095 | 0.045904 |
| 265.2 | 0.479228 | 0.490438 | 0.524875 | 0.565915 | 0.593513 | 0.644955 | 1.57377  | 0.606243 | 0.190057 | 0.089705 | 0.047852 |
| 265.3 | 0.481318 | 0.492575 | 0.526585 | 0.567293 | 0.595128 | 0.646428 | 1.569115 | 0.60686  | 0.191045 | 0.090315 | 0.04627  |
| 265.4 | 0.483313 | 0.494523 | 0.528438 | 0.568623 | 0.596363 | 0.646903 | 1.566265 | 0.607478 | 0.192128 | 0.090925 | 0.046514 |
| 265.5 | 0.485545 | 0.496755 | 0.53029  | 0.570238 | 0.59774  | 0.648518 | 1.56351  | 0.60819  | 0.193116 | 0.091534 | 0.046758 |
| 265.6 | 0.48773  | 0.498703 | 0.532238 | 0.57171  | 0.599213 | 0.649753 | 1.56066  | 0.608665 | 0.194085 | 0.092022 | 0.047002 |
| 265.7 | 0.489725 | 0.500555 | 0.53409  | 0.573563 | 0.60021  | 0.650608 | 1.558    | 0.609425 | 0.195187 | 0.092754 | 0.04749  |

|       |          |          |          |          |          |          |          |          |          |          |          |
|-------|----------|----------|----------|----------|----------|----------|----------|----------|----------|----------|----------|
| 265.8 | 0.491815 | 0.50255  | 0.535848 | 0.575273 | 0.601683 | 0.65208  | 1.55534  | 0.6099   | 0.196289 | 0.093486 | 0.047852 |
| 265.9 | 0.494048 | 0.504498 | 0.537795 | 0.577125 | 0.603155 | 0.652983 | 1.552775 | 0.610613 | 0.197505 | 0.09434  | 0.050051 |
| 266   | 0.496233 | 0.506493 | 0.539505 | 0.57874  | 0.604485 | 0.654455 | 1.548405 | 0.61161  | 0.198607 | 0.095067 | 0.04883  |
| 266.1 | 0.498465 | 0.508583 | 0.5415   | 0.580355 | 0.6061   | 0.655785 | 1.54565  | 0.612323 | 0.199462 | 0.095675 | 0.050659 |
| 266.2 | 0.500698 | 0.510435 | 0.54321  | 0.582065 | 0.607335 | 0.656783 | 1.54128  | 0.613083 | 0.200431 | 0.096292 | 0.049319 |
| 266.3 | 0.50293  | 0.512525 | 0.545205 | 0.58368  | 0.608808 | 0.658493 | 1.538715 | 0.613795 | 0.201647 | 0.097138 | 0.049685 |
| 266.4 | 0.504735 | 0.514615 | 0.546915 | 0.585533 | 0.610185 | 0.659253 | 1.53615  | 0.614413 | 0.202749 | 0.097755 | 0.050051 |
| 266.5 | 0.506968 | 0.516705 | 0.54891  | 0.5871   | 0.611515 | 0.660868 | 1.53349  | 0.615268 | 0.203851 | 0.098363 | 0.05017  |
| 266.6 | 0.509343 | 0.518938 | 0.550858 | 0.588478 | 0.613273 | 0.662103 | 1.530925 | 0.616123 | 0.20482  | 0.099095 | 0.050659 |
| 266.7 | 0.51129  | 0.520933 | 0.552615 | 0.590188 | 0.614745 | 0.662958 | 1.528265 | 0.616978 | 0.205808 | 0.099703 | 0.050901 |
| 266.8 | 0.513903 | 0.523023 | 0.554563 | 0.591945 | 0.616455 | 0.664668 | 1.525795 | 0.61807  | 0.207024 | 0.100558 | 0.051267 |
| 266.9 | 0.51623  | 0.525208 | 0.556653 | 0.594035 | 0.618213 | 0.665903 | 1.52323  | 0.618925 | 0.207993 | 0.101413 | 0.051633 |
| 267   | 0.518463 | 0.52744  | 0.558648 | 0.59565  | 0.61978  | 0.667755 | 1.52076  | 0.619923 | 0.209342 | 0.102268 | 0.052122 |
| 267.1 | 0.520933 | 0.530053 | 0.56088  | 0.597455 | 0.621253 | 0.669228 | 1.518385 | 0.620873 | 0.210558 | 0.103123 | 0.052488 |
| 267.2 | 0.52288  | 0.532    | 0.56259  | 0.59907  | 0.62263  | 0.670368 | 1.515915 | 0.62187  | 0.21166  | 0.103854 | 0.052977 |
| 267.3 | 0.525208 | 0.534328 | 0.56468  | 0.600923 | 0.624245 | 0.671935 | 1.513445 | 0.622963 | 0.21299  | 0.104709 | 0.051756 |
| 267.4 | 0.527678 | 0.536465 | 0.56677  | 0.603013 | 0.625955 | 0.67279  | 1.51259  | 0.624198 | 0.214092 | 0.105555 | 0.053708 |
| 267.5 | 0.52991  | 0.538318 | 0.568623 | 0.60477  | 0.62757  | 0.674548 | 1.510215 | 0.625148 | 0.215308 | 0.106533 | 0.052611 |
| 267.6 | 0.532618 | 0.540503 | 0.571235 | 0.606955 | 0.62928  | 0.675878 | 1.50917  | 0.626383 | 0.21641  | 0.107388 | 0.052977 |
| 267.7 | 0.534945 | 0.542735 | 0.573183 | 0.608713 | 0.631038 | 0.677018 | 1.508315 | 0.62757  | 0.217626 | 0.108243 | 0.055053 |
| 267.8 | 0.537415 | 0.545205 | 0.57551  | 0.610803 | 0.632605 | 0.679108 | 1.505845 | 0.62871  | 0.218861 | 0.108975 | 0.053951 |
| 267.9 | 0.540028 | 0.547675 | 0.577885 | 0.612893 | 0.634363 | 0.680343 | 1.5048   | 0.63004  | 0.219944 | 0.109706 | 0.055903 |
| 268   | 0.542118 | 0.549765 | 0.5795   | 0.614508 | 0.63593  | 0.682053 | 1.502425 | 0.63137  | 0.221293 | 0.110438 | 0.056392 |
| 268.1 | 0.544445 | 0.551855 | 0.581685 | 0.616455 | 0.637545 | 0.68381  | 1.499955 | 0.632843 | 0.222642 | 0.111293 | 0.055295 |
| 268.2 | 0.546915 | 0.554088 | 0.58368  | 0.61845  | 0.639255 | 0.684998 | 1.498815 | 0.633935 | 0.223725 | 0.111901 | 0.057124 |
| 268.3 | 0.549385 | 0.556415 | 0.585865 | 0.620635 | 0.641108 | 0.686993 | 1.49644  | 0.635408 | 0.225074 | 0.112756 | 0.056026 |
| 268.4 | 0.552235 | 0.559123 | 0.588335 | 0.622773 | 0.643245 | 0.68837  | 1.495395 | 0.636738 | 0.226423 | 0.113611 | 0.056516 |
| 268.5 | 0.554943 | 0.561973 | 0.590805 | 0.6251   | 0.64543  | 0.690935 | 1.49454  | 0.638353 | 0.227753 | 0.114589 | 0.057124 |
| 268.6 | 0.55765  | 0.564823 | 0.593513 | 0.62719  | 0.647663 | 0.69293  | 1.493685 | 0.640158 | 0.229216 | 0.115558 | 0.05615  |
| 268.7 | 0.560595 | 0.567293 | 0.596125 | 0.629423 | 0.649895 | 0.69464  | 1.49255  | 0.641725 | 0.230451 | 0.116413 | 0.056634 |
| 268.8 | 0.563208 | 0.56962  | 0.598453 | 0.63175  | 0.651748 | 0.696873 | 1.49454  | 0.643198 | 0.231534 | 0.117268 | 0.056881 |
| 268.9 | 0.566153 | 0.571948 | 0.601065 | 0.633983 | 0.653933 | 0.698108 | 1.49511  | 0.644813 | 0.232769 | 0.118    | 0.05871  |
| 269   | 0.568765 | 0.574275 | 0.603393 | 0.636453 | 0.655785 | 0.700055 | 1.49397  | 0.646238 | 0.233852 | 0.118731 | 0.059076 |
| 269.1 | 0.571473 | 0.576888 | 0.606005 | 0.638923 | 0.657875 | 0.702383 | 1.49283  | 0.647948 | 0.235087 | 0.119463 | 0.059442 |
| 269.2 | 0.57456  | 0.579738 | 0.60857  | 0.64125  | 0.660108 | 0.704235 | 1.49188  | 0.649943 | 0.236417 | 0.120441 | 0.060054 |
| 269.3 | 0.57703  | 0.582208 | 0.610898 | 0.64372  | 0.66196  | 0.706468 | 1.49093  | 0.651985 | 0.238013 | 0.121543 | 0.059199 |
| 269.4 | 0.58007  | 0.58539  | 0.61389  | 0.64619  | 0.664288 | 0.70832  | 1.49131  | 0.653838 | 0.239229 | 0.122398 | 0.059565 |
| 269.5 | 0.58292  | 0.588098 | 0.616218 | 0.64904  | 0.666663 | 0.71041  | 1.491785 | 0.655785 | 0.240806 | 0.123253 | 0.060173 |
| 269.6 | 0.585865 | 0.591328 | 0.619068 | 0.651748 | 0.669465 | 0.713023 | 1.492165 | 0.65759  | 0.242155 | 0.124099 | 0.060539 |
| 269.7 | 0.588953 | 0.594273 | 0.622013 | 0.654218 | 0.671935 | 0.715113 | 1.492545 | 0.659538 | 0.243504 | 0.124954 | 0.061028 |
| 269.8 | 0.59166  | 0.596885 | 0.62472  | 0.656925 | 0.67431  | 0.717678 | 1.49283  | 0.661628 | 0.244967 | 0.125685 | 0.061517 |
| 269.9 | 0.59489  | 0.599925 | 0.627808 | 0.659253 | 0.67678  | 0.71991  | 1.4934   | 0.663955 | 0.24643  | 0.126787 | 0.06347  |
| 270   | 0.59774  | 0.602395 | 0.63042  | 0.661818 | 0.678728 | 0.722    | 1.492355 | 0.66614  | 0.247893 | 0.127889 | 0.062615 |



|       |          |          |          |          |          |          |          |          |          |          |          |
|-------|----------|----------|----------|----------|----------|----------|----------|----------|----------|----------|----------|
| 270.1 | 0.600923 | 0.605483 | 0.63346  | 0.664573 | 0.681578 | 0.72485  | 1.49264  | 0.668088 | 0.249223 | 0.128621 | 0.06298  |
| 270.2 | 0.603868 | 0.608095 | 0.63593  | 0.666758 | 0.684143 | 0.72656  | 1.49302  | 0.670035 | 0.250686 | 0.12959  | 0.06347  |
| 270.3 | 0.606623 | 0.610423 | 0.638163 | 0.669228 | 0.686233 | 0.728793 | 1.49321  | 0.671983 | 0.251921 | 0.130445 | 0.062491 |
| 270.4 | 0.609568 | 0.613368 | 0.640775 | 0.67184  | 0.688608 | 0.730883 | 1.49492  | 0.67431  | 0.253384 | 0.131176 | 0.064325 |
| 270.5 | 0.612513 | 0.616218 | 0.643483 | 0.674548 | 0.690935 | 0.73321  | 1.4953   | 0.67678  | 0.254847 | 0.132155 | 0.063346 |
| 270.6 | 0.61522  | 0.618925 | 0.645953 | 0.677018 | 0.693168 | 0.73568  | 1.49701  | 0.678965 | 0.256177 | 0.13301  | 0.063712 |
| 270.7 | 0.61807  | 0.62187  | 0.64866  | 0.679345 | 0.695638 | 0.737438 | 1.49872  | 0.681388 | 0.25764  | 0.133865 | 0.064078 |
| 270.8 | 0.621015 | 0.6251   | 0.651463 | 0.682053 | 0.698203 | 0.74024  | 1.500525 | 0.683858 | 0.259103 | 0.13472  | 0.064567 |
| 270.9 | 0.623628 | 0.627808 | 0.654218 | 0.684665 | 0.700578 | 0.742093 | 1.502235 | 0.686138 | 0.260452 | 0.135575 | 0.066396 |
| 271   | 0.626681 | 0.630895 | 0.657258 | 0.687468 | 0.703285 | 0.7448   | 1.50252  | 0.688465 | 0.261915 | 0.13642  | 0.065298 |
| 271.1 | 0.62966  | 0.633365 | 0.65987  | 0.689938 | 0.70547  | 0.747175 | 1.504325 | 0.690888 | 0.263511 | 0.137275 | 0.065906 |
| 271.2 | 0.63251  | 0.635693 | 0.662578 | 0.69217  | 0.707845 | 0.748885 | 1.50594  | 0.693215 | 0.264727 | 0.138007 | 0.066153 |
| 271.3 | 0.635455 | 0.638638 | 0.665285 | 0.694498 | 0.710173 | 0.751735 | 1.507745 | 0.695685 | 0.266304 | 0.138985 | 0.066643 |
| 271.4 | 0.638305 | 0.641488 | 0.667993 | 0.697205 | 0.7125   | 0.753683 | 1.50955  | 0.697965 | 0.267767 | 0.13984  | 0.068714 |
| 271.5 | 0.64087  | 0.644338 | 0.670605 | 0.69996  | 0.714733 | 0.756153 | 1.509835 | 0.70053  | 0.269116 | 0.140819 | 0.068961 |
| 271.6 | 0.643815 | 0.647283 | 0.67317  | 0.702288 | 0.71744  | 0.758765 | 1.510215 | 0.703238 | 0.270579 | 0.141797 | 0.069569 |
| 271.7 | 0.646285 | 0.64961  | 0.675403 | 0.704853 | 0.71953  | 0.760095 | 1.511925 | 0.705565 | 0.273505 | 0.142766 | 0.069934 |
| 271.8 | 0.64904  | 0.651985 | 0.67773  | 0.70699  | 0.721763 | 0.762565 | 1.513635 | 0.707988 | 0.274968 | 0.143498 | 0.0703   |
| 271.9 | 0.651985 | 0.65493  | 0.68058  | 0.709318 | 0.72447  | 0.764418 | 1.51544  | 0.71041  | 0.276564 | 0.144476 | 0.070913 |
| 272   | 0.654835 | 0.657543 | 0.68305  | 0.712168 | 0.72694  | 0.76665  | 1.517055 | 0.712738 | 0.27778  | 0.145084 | 0.069692 |
| 272.1 | 0.657875 | 0.660488 | 0.686138 | 0.714733 | 0.729648 | 0.769738 | 1.518765 | 0.715208 | 0.27778  | 0.145939 | 0.070058 |
| 272.2 | 0.660488 | 0.663195 | 0.688608 | 0.71744  | 0.731738 | 0.771448 | 1.52057  | 0.717868 | 0.279243 | 0.146671 | 0.070547 |
| 272.3 | 0.663338 | 0.665665 | 0.691173 | 0.720148 | 0.73397  | 0.774155 | 1.522185 | 0.720053 | 0.280459 | 0.147279 | 0.069445 |
| 272.4 | 0.666283 | 0.668753 | 0.694165 | 0.722618 | 0.73644  | 0.776245 | 1.525415 | 0.722618 | 0.281808 | 0.148134 | 0.071397 |
| 272.5 | 0.668848 | 0.671223 | 0.696493 | 0.72523  | 0.73853  | 0.778335 | 1.527315 | 0.725088 | 0.283271 | 0.148989 | 0.071887 |
| 272.6 | 0.671698 | 0.674025 | 0.6992   | 0.7277   | 0.741143 | 0.780805 | 1.528835 | 0.727273 | 0.284373 | 0.14972  | 0.070547 |
| 272.7 | 0.674785 | 0.676875 | 0.70205  | 0.729885 | 0.743328 | 0.782658 | 1.532255 | 0.729838 | 0.285836 | 0.150699 | 0.072499 |
| 272.8 | 0.677398 | 0.679488 | 0.704615 | 0.732593 | 0.746035 | 0.785365 | 1.533965 | 0.732023 | 0.287166 | 0.151554 | 0.072984 |
| 272.9 | 0.680343 | 0.68229  | 0.707465 | 0.735348 | 0.748505 | 0.787503 | 1.535675 | 0.734445 | 0.288401 | 0.152285 | 0.071644 |
| 273   | 0.683668 | 0.685283 | 0.71041  | 0.737675 | 0.751118 | 0.789925 | 1.539    | 0.736915 | 0.289731 | 0.153017 | 0.073597 |
| 273.1 | 0.686233 | 0.687848 | 0.713023 | 0.740383 | 0.753588 | 0.792395 | 1.540805 | 0.739338 | 0.291194 | 0.153748 | 0.074081 |
| 273.2 | 0.688845 | 0.690318 | 0.715493 | 0.742615 | 0.755298 | 0.793915 | 1.54261  | 0.742045 | 0.292543 | 0.15448  | 0.074452 |
| 273.3 | 0.691553 | 0.692645 | 0.71782  | 0.7448   | 0.757388 | 0.796623 | 1.54451  | 0.744468 | 0.293873 | 0.155335 | 0.074817 |
| 273.4 | 0.694023 | 0.695495 | 0.720148 | 0.747413 | 0.75962  | 0.798475 | 1.54622  | 0.746795 | 0.295108 | 0.155943 | 0.075183 |
| 273.5 | 0.696588 | 0.697965 | 0.722523 | 0.749645 | 0.761853 | 0.800803 | 1.54793  | 0.749123 | 0.296324 | 0.15656  | 0.075549 |
| 273.6 | 0.6992   | 0.700673 | 0.72485  | 0.752353 | 0.764323 | 0.803368 | 1.549735 | 0.751545 | 0.297673 | 0.157406 | 0.074452 |
| 273.7 | 0.701433 | 0.703285 | 0.72732  | 0.754918 | 0.766508 | 0.804745 | 1.553155 | 0.753873 | 0.299003 | 0.158147 | 0.076404 |
| 273.8 | 0.703998 | 0.70547  | 0.730028 | 0.757388 | 0.768883 | 0.807453 | 1.55496  | 0.7562   | 0.300352 | 0.158878 | 0.076888 |
| 273.9 | 0.70661  | 0.708083 | 0.732593 | 0.759858 | 0.771305 | 0.809163 | 1.556765 | 0.75848  | 0.301568 | 0.159724 | 0.075791 |
| 274   | 0.709413 | 0.710553 | 0.735205 | 0.76209  | 0.77368  | 0.811538 | 1.56009  | 0.76057  | 0.302537 | 0.160341 | 0.07762  |
| 274.1 | 0.712168 | 0.71326  | 0.737675 | 0.76418  | 0.776008 | 0.814103 | 1.561895 | 0.762993 | 0.303772 | 0.161196 | 0.078109 |
| 274.2 | 0.714875 | 0.715588 | 0.739908 | 0.766508 | 0.778335 | 0.81548  | 1.563605 | 0.76532  | 0.304855 | 0.161928 | 0.076646 |
| 274.3 | 0.71744  | 0.717963 | 0.742473 | 0.76874  | 0.780473 | 0.818188 | 1.56712  | 0.76779  | 0.306204 | 0.162659 | 0.078722 |

|       |          |          |          |          |          |          |          |          |          |          |          |
|-------|----------|----------|----------|----------|----------|----------|----------|----------|----------|----------|----------|
| 274.4 | 0.72029  | 0.720765 | 0.74518  | 0.77121  | 0.7828   | 0.820135 | 1.56902  | 0.770213 | 0.307553 | 0.163267 | 0.079206 |
| 274.5 | 0.722523 | 0.722998 | 0.74727  | 0.7733   | 0.784653 | 0.82213  | 1.570825 | 0.772778 | 0.308883 | 0.163999 | 0.077867 |
| 274.6 | 0.72523  | 0.725563 | 0.749503 | 0.775533 | 0.7866   | 0.8246   | 1.57453  | 0.775343 | 0.310479 | 0.164854 | 0.080061 |
| 274.7 | 0.72732  | 0.727938 | 0.751593 | 0.77786  | 0.788453 | 0.825835 | 1.576335 | 0.77767  | 0.311695 | 0.165585 | 0.080427 |
| 274.8 | 0.730028 | 0.730503 | 0.7543   | 0.78033  | 0.791065 | 0.828543 | 1.57814  | 0.780093 | 0.312911 | 0.166317 | 0.079088 |
| 274.9 | 0.732878 | 0.733115 | 0.75677  | 0.7828   | 0.793393 | 0.830395 | 1.581655 | 0.782278 | 0.314013 | 0.167048 | 0.081159 |
| 275   | 0.735585 | 0.735823 | 0.759858 | 0.785508 | 0.796338 | 0.83296  | 1.58365  | 0.784843 | 0.315229 | 0.16778  | 0.079938 |
| 275.1 | 0.738293 | 0.738293 | 0.76247  | 0.78812  | 0.798713 | 0.83543  | 1.58726  | 0.78755  | 0.316578 | 0.168511 | 0.080427 |
| 275.2 | 0.740858 | 0.740763 | 0.76494  | 0.790828 | 0.80104  | 0.836903 | 1.590965 | 0.789973 | 0.317794 | 0.169243 | 0.080793 |
| 275.3 | 0.743565 | 0.74347  | 0.767743 | 0.793298 | 0.803368 | 0.839753 | 1.594765 | 0.792633 | 0.319143 | 0.170098 | 0.081282 |
| 275.4 | 0.74594  | 0.745703 | 0.769975 | 0.795863 | 0.805125 | 0.841463 | 1.59828  | 0.794865 | 0.320226 | 0.170829 | 0.083234 |
| 275.5 | 0.749123 | 0.748885 | 0.77292  | 0.79819  | 0.807833 | 0.844313 | 1.600275 | 0.79743  | 0.321461 | 0.171561 | 0.081771 |
| 275.6 | 0.75183  | 0.751355 | 0.775153 | 0.800423 | 0.810065 | 0.846783 | 1.603885 | 0.799853 | 0.322677 | 0.172169 | 0.083842 |
| 275.7 | 0.754443 | 0.754063 | 0.777385 | 0.803368 | 0.812488 | 0.848255 | 1.605975 | 0.802275 | 0.324007 | 0.173147 | 0.082503 |
| 275.8 | 0.757293 | 0.75715  | 0.780188 | 0.8056   | 0.815243 | 0.851248 | 1.609775 | 0.804983 | 0.327066 | 0.173641 | 0.082992 |
| 275.9 | 0.759478 | 0.759383 | 0.782183 | 0.80769  | 0.817333 | 0.852578 | 1.61367  | 0.807548 | 0.328529 | 0.174487 | 0.08531  |
| 276   | 0.761853 | 0.761853 | 0.784748 | 0.810303 | 0.81966  | 0.855048 | 1.61557  | 0.810113 | 0.329631 | 0.175228 | 0.083847 |
| 276.1 | 0.76456  | 0.764323 | 0.78736  | 0.812155 | 0.821893 | 0.857898 | 1.619465 | 0.812773 | 0.330847 | 0.175712 | 0.086042 |
| 276.2 | 0.767125 | 0.766413 | 0.789593 | 0.814245 | 0.823983 | 0.859228 | 1.62146  | 0.81548  | 0.330239 | 0.176444 | 0.084579 |
| 276.3 | 0.769975 | 0.768978 | 0.792158 | 0.816953 | 0.826073 | 0.862078 | 1.625355 | 0.817903 | 0.331341 | 0.177299 | 0.084821 |
| 276.4 | 0.772825 | 0.77159  | 0.79477  | 0.819043 | 0.828543 | 0.863788 | 1.629535 | 0.820705 | 0.332804 | 0.178277 | 0.087381 |
| 276.5 | 0.77501  | 0.77368  | 0.79686  | 0.82137  | 0.830775 | 0.865878 | 1.631625 | 0.82327  | 0.33402  | 0.179132 | 0.085918 |
| 276.6 | 0.77748  | 0.776008 | 0.79933  | 0.82384  | 0.833103 | 0.86849  | 1.63552  | 0.825598 | 0.334989 | 0.17974  | 0.088117 |
| 276.7 | 0.779475 | 0.778335 | 0.801515 | 0.82593  | 0.83543  | 0.869725 | 1.637515 | 0.828258 | 0.336224 | 0.180348 | 0.086531 |
| 276.8 | 0.78204  | 0.781185 | 0.80427  | 0.828543 | 0.838043 | 0.87267  | 1.6416   | 0.830965 | 0.337307 | 0.18108  | 0.086773 |
| 276.9 | 0.784748 | 0.783893 | 0.806978 | 0.83125  | 0.840513 | 0.874428 | 1.64559  | 0.833388 | 0.338542 | 0.181688 | 0.087015 |
| 277   | 0.78736  | 0.786885 | 0.809685 | 0.83372  | 0.84322  | 0.87685  | 1.64977  | 0.83619  | 0.339872 | 0.182419 | 0.087381 |
| 277.1 | 0.78983  | 0.789308 | 0.812155 | 0.836285 | 0.84531  | 0.879463 | 1.65395  | 0.83866  | 0.341221 | 0.183274 | 0.08787  |
| 277.2 | 0.792063 | 0.791683 | 0.814483 | 0.838423 | 0.847163 | 0.880698 | 1.658035 | 0.84132  | 0.342437 | 0.184006 | 0.088236 |
| 277.3 | 0.79439  | 0.79401  | 0.816478 | 0.840275 | 0.849253 | 0.883263 | 1.66231  | 0.844028 | 0.343786 | 0.184861 | 0.088483 |
| 277.4 | 0.796623 | 0.796005 | 0.8189   | 0.842365 | 0.851343 | 0.884783 | 1.666585 | 0.846688 | 0.345002 | 0.185592 | 0.088849 |
| 277.5 | 0.799188 | 0.79857  | 0.821275 | 0.844693 | 0.853955 | 0.887205 | 1.67086  | 0.84949  | 0.346104 | 0.1862   | 0.088968 |
| 277.6 | 0.8018   | 0.800898 | 0.82346  | 0.84702  | 0.856283 | 0.88958  | 1.67542  | 0.852198 | 0.34732  | 0.187179 | 0.089457 |
| 277.7 | 0.804128 | 0.803273 | 0.825693 | 0.84949  | 0.858373 | 0.891053 | 1.679695 | 0.854858 | 0.348289 | 0.187787 | 0.08958  |
| 277.8 | 0.806598 | 0.805505 | 0.827783 | 0.851865 | 0.8607   | 0.893903 | 1.68416  | 0.85975  | 0.349505 | 0.188642 | 0.089946 |
| 277.9 | 0.808688 | 0.807453 | 0.830015 | 0.85367  | 0.862553 | 0.895138 | 1.68853  | 0.862315 | 0.350607 | 0.189373 | 0.092506 |
| 278   | 0.81054  | 0.809685 | 0.832105 | 0.856425 | 0.864643 | 0.897465 | 1.690905 | 0.864975 | 0.351956 | 0.190105 | 0.090678 |
| 278.1 | 0.812773 | 0.81187  | 0.834338 | 0.858373 | 0.866638 | 0.899555 | 1.69537  | 0.867778 | 0.353058 | 0.190722 | 0.093119 |
| 278.2 | 0.814958 | 0.814245 | 0.83657  | 0.860843 | 0.868633 | 0.90079  | 1.697745 | 0.8683   | 0.354274 | 0.191207 | 0.091043 |
| 278.3 | 0.817428 | 0.816715 | 0.838755 | 0.863313 | 0.87096  | 0.90364  | 1.702305 | 0.870865 | 0.357561 | 0.191815 | 0.09129  |
| 278.4 | 0.82004  | 0.819185 | 0.841368 | 0.865403 | 0.873193 | 0.904875 | 1.70696  | 0.87343  | 0.358663 | 0.19267  | 0.093974 |
| 278.5 | 0.822273 | 0.82175  | 0.843695 | 0.867873 | 0.875758 | 0.907583 | 1.709335 | 0.875853 | 0.359632 | 0.193278 | 0.091775 |
| 278.6 | 0.82422  | 0.82384  | 0.845928 | 0.869725 | 0.877848 | 0.90991  | 1.714085 | 0.878418 | 0.360734 | 0.194133 | 0.094459 |

|       |          |          |          |          |          |          |          |          |          |          |          |
|-------|----------|----------|----------|----------|----------|----------|----------|----------|----------|----------|----------|
| 278.7 | 0.826548 | 0.826215 | 0.848398 | 0.872053 | 0.880223 | 0.91162  | 1.71646  | 0.88084  | 0.359404 | 0.194864 | 0.094829 |
| 278.8 | 0.828685 | 0.828163 | 0.850345 | 0.87343  | 0.882313 | 0.914233 | 1.719025 | 0.883548 | 0.36062  | 0.195596 | 0.092753 |
| 278.9 | 0.830395 | 0.829635 | 0.852103 | 0.87476  | 0.883643 | 0.914613 | 1.723775 | 0.885875 | 0.361589 | 0.19609  | 0.095314 |
| 279   | 0.832248 | 0.83125  | 0.853813 | 0.876233 | 0.885258 | 0.916323 | 1.72634  | 0.88844  | 0.362691 | 0.196821 | 0.095679 |
| 279.1 | 0.833483 | 0.832485 | 0.855048 | 0.877468 | 0.886493 | 0.917558 | 1.72881  | 0.89072  | 0.363546 | 0.197182 | 0.093361 |
| 279.2 | 0.835193 | 0.8341   | 0.856758 | 0.879605 | 0.888108 | 0.91865  | 1.73356  | 0.892668 | 0.364401 | 0.197429 | 0.095679 |
| 279.3 | 0.836808 | 0.83581  | 0.85823  | 0.881315 | 0.889818 | 0.920883 | 1.736125 | 0.894995 | 0.365256 | 0.198037 | 0.095926 |
| 279.4 | 0.83866  | 0.837805 | 0.860083 | 0.883405 | 0.891528 | 0.9215   | 1.738595 | 0.896848 | 0.366111 | 0.198284 | 0.093485 |
| 279.5 | 0.840275 | 0.839515 | 0.86146  | 0.884783 | 0.893285 | 0.923495 | 1.743535 | 0.898795 | 0.366833 | 0.198769 | 0.096045 |
| 279.6 | 0.841225 | 0.840608 | 0.862458 | 0.88635  | 0.894235 | 0.924208 | 1.7461   | 0.9006   | 0.367574 | 0.199263 | 0.096292 |
| 279.7 | 0.84246  | 0.841843 | 0.863788 | 0.888203 | 0.89547  | 0.925348 | 1.748665 | 0.902215 | 0.368429 | 0.199624 | 0.096416 |
| 279.8 | 0.843458 | 0.842698 | 0.864785 | 0.889438 | 0.896373 | 0.927438 | 1.75123  | 0.90402  | 0.369037 | 0.199871 | 0.098976 |
| 279.9 | 0.844693 | 0.843838 | 0.865878 | 0.890815 | 0.897228 | 0.927675 | 1.75123  | 0.905635 | 0.369531 | 0.200241 | 0.098976 |
| 280   | 0.846165 | 0.84531  | 0.867493 | 0.891433 | 0.898795 | 0.929765 | 1.75142  | 0.90744  | 0.370139 | 0.200479 | 0.096658 |
| 280.1 | 0.847163 | 0.846403 | 0.86849  | 0.892145 | 0.899935 | 0.930525 | 1.75408  | 0.90915  | 0.370614 | 0.200726 | 0.096781 |
| 280.2 | 0.847875 | 0.8474   | 0.869345 | 0.892905 | 0.900933 | 0.93062  | 1.75674  | 0.91048  | 0.371222 | 0.200973 | 0.0969   |
| 280.3 | 0.848398 | 0.848018 | 0.869963 | 0.89338  | 0.90155  | 0.93176  | 1.75921  | 0.911573 | 0.371469 | 0.200849 | 0.096781 |
| 280.4 | 0.848778 | 0.848493 | 0.870343 | 0.894378 | 0.902025 | 0.930858 | 1.761775 | 0.912713 | 0.371716 | 0.200973 | 0.099342 |
| 280.5 | 0.849395 | 0.849395 | 0.871055 | 0.894378 | 0.902643 | 0.932093 | 1.76187  | 0.913805 | 0.371963 | 0.20121  | 0.099465 |
| 280.6 | 0.849633 | 0.849633 | 0.871435 | 0.894235 | 0.902643 | 0.932378 | 1.76187  | 0.914755 | 0.372077 | 0.20121  | 0.099342 |
| 280.7 | 0.850013 | 0.850013 | 0.871435 | 0.894235 | 0.902643 | 0.931998 | 1.761965 | 0.91561  | 0.372324 | 0.20121  | 0.099342 |
| 280.8 | 0.850013 | 0.84987  | 0.871578 | 0.893903 | 0.9025   | 0.932235 | 1.761965 | 0.916133 | 0.372324 | 0.201087 | 0.096534 |
| 280.9 | 0.849633 | 0.849633 | 0.87134  | 0.893903 | 0.902263 | 0.930858 | 1.76472  | 0.916465 | 0.37221  | 0.201087 | 0.096416 |
| 281   | 0.849633 | 0.849728 | 0.871673 | 0.893523 | 0.902785 | 0.93138  | 1.76738  | 0.916703 | 0.372077 | 0.200849 | 0.096292 |
| 281.1 | 0.848873 | 0.848778 | 0.870818 | 0.893    | 0.902025 | 0.930383 | 1.769945 | 0.916703 | 0.37183  | 0.200602 | 0.09605  |
| 281.2 | 0.848018 | 0.847875 | 0.86982  | 0.89243  | 0.901028 | 0.929148 | 1.7727   | 0.91694  | 0.371716 | 0.200602 | 0.098734 |
| 281.3 | 0.8474   | 0.84702  | 0.868965 | 0.891813 | 0.899935 | 0.92853  | 1.7727   | 0.916465 | 0.371602 | 0.200241 | 0.098487 |
| 281.4 | 0.846403 | 0.84607  | 0.867873 | 0.891528 | 0.898795 | 0.92606  | 1.7727   | 0.916133 | 0.371222 | 0.199994 | 0.100805 |
| 281.5 | 0.84569  | 0.845548 | 0.867635 | 0.890673 | 0.898225 | 0.92606  | 1.770135 | 0.915515 | 0.370747 | 0.199624 | 0.100562 |
| 281.6 | 0.84455  | 0.844455 | 0.866495 | 0.8892   | 0.897085 | 0.92473  | 1.76776  | 0.914898 | 0.370367 | 0.199386 | 0.100439 |
| 281.7 | 0.843458 | 0.843458 | 0.865545 | 0.887965 | 0.895993 | 0.92321  | 1.765195 | 0.914043 | 0.369759 | 0.198892 | 0.100197 |
| 281.8 | 0.841985 | 0.84208  | 0.864025 | 0.886255 | 0.894378 | 0.92226  | 1.76263  | 0.913045 | 0.369151 | 0.198408 | 0.099831 |
| 281.9 | 0.840513 | 0.840608 | 0.862458 | 0.884498 | 0.893    | 0.919553 | 1.760255 | 0.912095 | 0.368676 | 0.198161 | 0.099707 |
| 282   | 0.83904  | 0.839373 | 0.860985 | 0.883168 | 0.89129  | 0.918318 | 1.75769  | 0.91048  | 0.367821 | 0.197553 | 0.099342 |
| 282.1 | 0.837188 | 0.837188 | 0.858848 | 0.880935 | 0.88958  | 0.915848 | 1.755125 | 0.908675 | 0.366966 | 0.196945 | 0.098852 |
| 282.2 | 0.835573 | 0.835193 | 0.857043 | 0.87932  | 0.887585 | 0.913758 | 1.75275  | 0.906728 | 0.366225 | 0.196337 | 0.09605  |
| 282.3 | 0.833863 | 0.83334  | 0.85519  | 0.877468 | 0.885638 | 0.912238 | 1.75275  | 0.90478  | 0.36537  | 0.195719 | 0.098244 |
| 282.4 | 0.83201  | 0.831393 | 0.853195 | 0.875283 | 0.883643 | 0.909293 | 1.75028  | 0.90269  | 0.364268 | 0.194988 | 0.097879 |
| 282.5 | 0.830015 | 0.829778 | 0.851248 | 0.873288 | 0.881315 | 0.907345 | 1.74781  | 0.9006   | 0.363185 | 0.194256 | 0.097513 |
| 282.6 | 0.827925 | 0.827688 | 0.849015 | 0.870343 | 0.878845 | 0.904495 | 1.745435 | 0.89832  | 0.36195  | 0.193401 | 0.097147 |
| 282.7 | 0.825313 | 0.82498  | 0.846165 | 0.867113 | 0.8759   | 0.901408 | 1.742965 | 0.895993 | 0.360734 | 0.19267  | 0.096658 |
| 282.8 | 0.822273 | 0.821893 | 0.843078 | 0.864168 | 0.872575 | 0.898225 | 1.740495 | 0.893428 | 0.359404 | 0.191815 | 0.096169 |
| 282.9 | 0.81928  | 0.818805 | 0.83999  | 0.861223 | 0.869488 | 0.89414  | 1.73812  | 0.890625 | 0.358055 | 0.19096  | 0.098121 |

|       |          |          |          |          |          |          |          |          |          |          |          |
|-------|----------|----------|----------|----------|----------|----------|----------|----------|----------|----------|----------|
| 283   | 0.815955 | 0.815575 | 0.836808 | 0.85823  | 0.86602  | 0.89129  | 1.73337  | 0.887918 | 0.356706 | 0.190228 | 0.097755 |
| 283.1 | 0.812773 | 0.812155 | 0.83334  | 0.855285 | 0.862838 | 0.887205 | 1.728525 | 0.884878 | 0.355376 | 0.189259 | 0.097147 |
| 283.2 | 0.809923 | 0.809305 | 0.830395 | 0.852435 | 0.85975  | 0.88426  | 1.723965 | 0.881838 | 0.354027 | 0.188528 | 0.099218 |
| 283.3 | 0.806978 | 0.806455 | 0.827545 | 0.849395 | 0.85652  | 0.881695 | 1.71684  | 0.878655 | 0.35245  | 0.187426 | 0.096169 |
| 283.4 | 0.80389  | 0.803653 | 0.824695 | 0.845928 | 0.853433 | 0.87761  | 1.712185 | 0.875378 | 0.350987 | 0.186571 | 0.097997 |
| 283.5 | 0.800803 | 0.800898 | 0.82213  | 0.842603 | 0.85063  | 0.874903 | 1.705535 | 0.872338 | 0.349505 | 0.185839 | 0.095561 |
| 283.6 | 0.797953 | 0.798095 | 0.81928  | 0.839658 | 0.84778  | 0.87134  | 1.700975 | 0.869155 | 0.348042 | 0.184861 | 0.094948 |
| 283.7 | 0.795008 | 0.795008 | 0.816193 | 0.83657  | 0.844693 | 0.86811  | 1.696605 | 0.86583  | 0.346465 | 0.184006 | 0.094706 |
| 283.8 | 0.792158 | 0.791778 | 0.81301  | 0.833483 | 0.841463 | 0.86526  | 1.692235 | 0.86279  | 0.345002 | 0.183151 | 0.094093 |
| 283.9 | 0.789308 | 0.78907  | 0.80978  | 0.830633 | 0.838423 | 0.861603 | 1.687865 | 0.85937  | 0.343406 | 0.182182 | 0.095679 |
| 284   | 0.786268 | 0.785983 | 0.806598 | 0.82745  | 0.83505  | 0.858848 | 1.681405 | 0.856093 | 0.341943 | 0.18145  | 0.093119 |
| 284.1 | 0.78318  | 0.783275 | 0.803368 | 0.82422  | 0.83201  | 0.85519  | 1.67713  | 0.852673 | 0.34048  | 0.180472 | 0.094824 |
| 284.2 | 0.780093 | 0.780473 | 0.800565 | 0.821275 | 0.829018 | 0.852198 | 1.67086  | 0.84949  | 0.33915  | 0.17974  | 0.092388 |
| 284.3 | 0.777005 | 0.777385 | 0.797335 | 0.818188 | 0.825693 | 0.849015 | 1.666585 | 0.846308 | 0.337554 | 0.178762 | 0.091775 |
| 284.4 | 0.77406  | 0.774535 | 0.794485 | 0.814863 | 0.822748 | 0.845168 | 1.662595 | 0.84341  | 0.336224 | 0.17803  | 0.091409 |
| 284.5 | 0.771068 | 0.771305 | 0.79154  | 0.81187  | 0.819898 | 0.842365 | 1.65851  | 0.840465 | 0.334989 | 0.177299 | 0.091167 |
| 284.6 | 0.768598 | 0.76874  | 0.78869  | 0.809448 | 0.817095 | 0.83904  | 1.65452  | 0.837568 | 0.333659 | 0.176444 | 0.090801 |
| 284.7 | 0.766033 | 0.766128 | 0.786268 | 0.806598 | 0.814483 | 0.836808 | 1.650625 | 0.834718 | 0.332557 | 0.175959 | 0.090435 |
| 284.8 | 0.763183 | 0.763325 | 0.783418 | 0.804128 | 0.811538 | 0.833863 | 1.646635 | 0.83182  | 0.331208 | 0.175104 | 0.090188 |
| 284.9 | 0.760713 | 0.76095  | 0.78109  | 0.8018   | 0.809163 | 0.831013 | 1.642645 | 0.829255 | 0.330125 | 0.174496 | 0.089823 |
| 285   | 0.758243 | 0.758623 | 0.778715 | 0.799093 | 0.806978 | 0.82878  | 1.63875  | 0.826453 | 0.329023 | 0.173765 | 0.08958  |
| 285.1 | 0.755298 | 0.755773 | 0.77577  | 0.796718 | 0.804128 | 0.82498  | 1.634855 | 0.823983 | 0.327921 | 0.173147 | 0.089215 |
| 285.2 | 0.753208 | 0.753825 | 0.773538 | 0.794865 | 0.802275 | 0.823223 | 1.631245 | 0.821798 | 0.327066 | 0.172786 | 0.089091 |
| 285.3 | 0.75088  | 0.751735 | 0.77159  | 0.792538 | 0.800043 | 0.821133 | 1.627445 | 0.819613 | 0.326211 | 0.172292 | 0.088897 |
| 285.4 | 0.74841  | 0.749123 | 0.76912  | 0.790543 | 0.797858 | 0.818425 | 1.62545  | 0.817428 | 0.325109 | 0.171808 | 0.088836 |
| 285.5 | 0.746178 | 0.747033 | 0.767125 | 0.788833 | 0.796005 | 0.816953 | 1.62184  | 0.81548  | 0.324254 | 0.171437 | 0.086284 |
| 285.6 | 0.744183 | 0.7448   | 0.765178 | 0.786505 | 0.79401  | 0.81434  | 1.620035 | 0.81377  | 0.323399 | 0.170953 | 0.08787  |
| 285.7 | 0.741855 | 0.742473 | 0.762945 | 0.784748 | 0.79192  | 0.812488 | 1.61633  | 0.811918 | 0.322544 | 0.170592 | 0.087747 |
| 285.8 | 0.739908 | 0.740858 | 0.761093 | 0.78318  | 0.79021  | 0.810778 | 1.612625 | 0.81035  | 0.321822 | 0.170221 | 0.087505 |
| 285.9 | 0.738293 | 0.73929  | 0.759478 | 0.781328 | 0.788595 | 0.809163 | 1.60911  | 0.808878 | 0.321081 | 0.169851 | 0.087262 |
| 286   | 0.73644  | 0.737675 | 0.75791  | 0.779713 | 0.787123 | 0.807833 | 1.605595 | 0.80731  | 0.320359 | 0.169613 | 0.085429 |
| 286.1 | 0.73473  | 0.73606  | 0.756295 | 0.77824  | 0.785745 | 0.8056   | 1.6036   | 0.805695 | 0.319504 | 0.169005 | 0.086773 |
| 286.2 | 0.73321  | 0.734588 | 0.75506  | 0.776863 | 0.78451  | 0.804508 | 1.600085 | 0.804508 | 0.318896 | 0.168635 | 0.084821 |
| 286.3 | 0.731975 | 0.73359  | 0.753683 | 0.775913 | 0.783275 | 0.80313  | 1.598375 | 0.803368 | 0.318288 | 0.168388 | 0.084579 |
| 286.4 | 0.730645 | 0.732355 | 0.752828 | 0.774773 | 0.78242  | 0.8018   | 1.596665 | 0.802418 | 0.317794 | 0.168027 | 0.084455 |
| 286.5 | 0.729268 | 0.73112  | 0.751593 | 0.773538 | 0.781328 | 0.800803 | 1.594955 | 0.801183 | 0.317186 | 0.16778  | 0.084208 |
| 286.6 | 0.7277   | 0.72979  | 0.750263 | 0.772208 | 0.780188 | 0.799093 | 1.593245 | 0.800233 | 0.316445 | 0.167419 | 0.083966 |
| 286.7 | 0.726085 | 0.728318 | 0.749265 | 0.770973 | 0.779095 | 0.797953 | 1.591535 | 0.798998 | 0.315837 | 0.167048 | 0.083724 |
| 286.8 | 0.724233 | 0.726703 | 0.747413 | 0.769595 | 0.777385 | 0.796005 | 1.589825 | 0.797905 | 0.315229 | 0.166687 | 0.083358 |
| 286.9 | 0.722523 | 0.72523  | 0.746035 | 0.768265 | 0.776008 | 0.794485 | 1.588115 | 0.79667  | 0.314621 | 0.16644  | 0.083111 |
| 287   | 0.720908 | 0.723758 | 0.744705 | 0.76665  | 0.774773 | 0.793013 | 1.586405 | 0.795483 | 0.313899 | 0.165832 | 0.082869 |
| 287.1 | 0.719055 | 0.722143 | 0.74309  | 0.76456  | 0.773443 | 0.790923 | 1.584885 | 0.794343 | 0.313405 | 0.165585 | 0.082745 |
| 287.2 | 0.716823 | 0.720148 | 0.741238 | 0.762565 | 0.771828 | 0.789213 | 1.583175 | 0.793155 | 0.312664 | 0.164854 | 0.082379 |

|       |          |          |          |          |          |          |          |          |          |          |          |
|-------|----------|----------|----------|----------|----------|----------|----------|----------|----------|----------|----------|
| 287.3 | 0.715113 | 0.718675 | 0.739528 | 0.760855 | 0.770213 | 0.78698  | 1.58156  | 0.79192  | 0.311942 | 0.164369 | 0.082137 |
| 287.4 | 0.71288  | 0.716585 | 0.737295 | 0.75886  | 0.768265 | 0.785033 | 1.579945 | 0.79059  | 0.311087 | 0.163875 | 0.08189  |
| 287.5 | 0.710648 | 0.714258 | 0.734968 | 0.756533 | 0.766128 | 0.782895 | 1.578235 | 0.789118 | 0.310099 | 0.163267 | 0.081524 |
| 287.6 | 0.707465 | 0.710933 | 0.73188  | 0.7543   | 0.763088 | 0.779333 | 1.576715 | 0.78755  | 0.30913  | 0.162783 | 0.082745 |
| 287.7 | 0.70452  | 0.707703 | 0.728793 | 0.751973 | 0.760238 | 0.777005 | 1.573295 | 0.785603 | 0.307914 | 0.161928 | 0.082014 |
| 287.8 | 0.701053 | 0.704615 | 0.725705 | 0.749265 | 0.757008 | 0.7733   | 1.56997  | 0.783608 | 0.306812 | 0.161196 | 0.082992 |
| 287.9 | 0.697585 | 0.70129  | 0.72238  | 0.747175 | 0.753683 | 0.770118 | 1.565125 | 0.781328 | 0.305596 | 0.160218 | 0.083966 |
| 288   | 0.695258 | 0.699058 | 0.72029  | 0.744183 | 0.751735 | 0.767648 | 1.55876  | 0.779095 | 0.30438  | 0.159363 | 0.083358 |
| 288.1 | 0.69217  | 0.69597  | 0.717345 | 0.740858 | 0.748743 | 0.763943 | 1.552395 | 0.77653  | 0.303145 | 0.158384 | 0.082745 |
| 288.2 | 0.688988 | 0.69293  | 0.714353 | 0.737295 | 0.74594  | 0.76095  | 1.54622  | 0.77387  | 0.301568 | 0.157406 | 0.082014 |
| 288.3 | 0.68514  | 0.68932  | 0.71079  | 0.733353 | 0.74233  | 0.756533 | 1.53995  | 0.770925 | 0.299858 | 0.156313 | 0.082622 |
| 288.4 | 0.681198 | 0.685758 | 0.70699  | 0.72941  | 0.738673 | 0.75297  | 1.53235  | 0.767885 | 0.298148 | 0.155211 | 0.08189  |
| 288.5 | 0.677255 | 0.681815 | 0.702905 | 0.725088 | 0.734825 | 0.748885 | 1.525035 | 0.76437  | 0.296324 | 0.154242 | 0.081159 |
| 288.6 | 0.672695 | 0.677493 | 0.698583 | 0.720765 | 0.73017  | 0.743945 | 1.51791  | 0.760713 | 0.2945   | 0.15314  | 0.080304 |
| 288.7 | 0.66823  | 0.673075 | 0.69426  | 0.71573  | 0.725943 | 0.739765 | 1.51069  | 0.756675 | 0.292296 | 0.151677 | 0.078109 |
| 288.8 | 0.663433 | 0.668373 | 0.689605 | 0.710553 | 0.720765 | 0.733828 | 1.505085 | 0.75202  | 0.290092 | 0.150338 | 0.077254 |
| 288.9 | 0.658255 | 0.663433 | 0.684285 | 0.704995 | 0.715493 | 0.72865  | 1.499575 | 0.747413 | 0.28766  | 0.148865 | 0.076399 |
| 289   | 0.65322  | 0.658635 | 0.679108 | 0.699343 | 0.710315 | 0.722855 | 1.494065 | 0.742283 | 0.285095 | 0.147402 | 0.075425 |
| 289.1 | 0.647663 | 0.653078 | 0.673313 | 0.693168 | 0.704378 | 0.716585 | 1.488745 | 0.736915 | 0.282663 | 0.145939 | 0.07457  |
| 289.2 | 0.640775 | 0.646428 | 0.66652  | 0.68723  | 0.69749  | 0.709793 | 1.48333  | 0.731405 | 0.279984 | 0.144229 | 0.076157 |
| 289.3 | 0.63384  | 0.63954  | 0.659728 | 0.681055 | 0.69046  | 0.70167  | 1.47554  | 0.725705 | 0.277172 | 0.142643 | 0.078964 |
| 289.4 | 0.626953 | 0.632368 | 0.652698 | 0.675165 | 0.68343  | 0.694498 | 1.464045 | 0.71972  | 0.274246 | 0.140942 | 0.080304 |
| 289.5 | 0.62016  | 0.625955 | 0.64619  | 0.669133 | 0.676638 | 0.68723  | 1.450365 | 0.713498 | 0.271187 | 0.139232 | 0.081643 |
| 289.6 | 0.614508 | 0.62016  | 0.640253 | 0.662815 | 0.6707   | 0.68096  | 1.434405 | 0.706895 | 0.267767 | 0.137275 | 0.08018  |
| 289.7 | 0.608475 | 0.614128 | 0.633983 | 0.655928 | 0.664573 | 0.674928 | 1.419015 | 0.700055 | 0.26448  | 0.135204 | 0.078475 |
| 289.8 | 0.6023   | 0.608095 | 0.627665 | 0.648755 | 0.65816  | 0.668135 | 1.40429  | 0.69274  | 0.260813 | 0.133133 | 0.077007 |
| 289.9 | 0.596125 | 0.601445 | 0.621015 | 0.641488 | 0.651368 | 0.661723 | 1.389945 | 0.685188 | 0.257165 | 0.130815 | 0.075421 |
| 290   | 0.589238 | 0.59451  | 0.61389  | 0.633745 | 0.6441   | 0.654075 | 1.37598  | 0.677635 | 0.253631 | 0.128611 | 0.074689 |
| 290.1 | 0.582208 | 0.58748  | 0.606718 | 0.62643  | 0.636833 | 0.646665 | 1.36135  | 0.669703 | 0.249717 | 0.126293 | 0.071882 |
| 290.2 | 0.575273 | 0.580355 | 0.599308 | 0.61845  | 0.62928  | 0.639018 | 1.34843  | 0.66177  | 0.245936 | 0.123975 | 0.070419 |
| 290.3 | 0.56715  | 0.57247  | 0.59109  | 0.610185 | 0.621015 | 0.629898 | 1.335605 | 0.65322  | 0.241908 | 0.121534 | 0.068709 |
| 290.4 | 0.559645 | 0.564538 | 0.583158 | 0.60192  | 0.613035 | 0.62187  | 1.323255 | 0.644195 | 0.238013 | 0.118978 | 0.067004 |
| 290.5 | 0.551618 | 0.55632  | 0.574655 | 0.59318  | 0.604485 | 0.61275  | 1.311285 | 0.634933 | 0.233852 | 0.11629  | 0.065417 |
| 290.6 | 0.543353 | 0.54815  | 0.566295 | 0.584535 | 0.595888 | 0.604248 | 1.2996   | 0.625385 | 0.22971  | 0.113611 | 0.063707 |
| 290.7 | 0.535088 | 0.539648 | 0.557508 | 0.575415 | 0.5871   | 0.595508 | 1.28839  | 0.615885 | 0.225568 | 0.111169 | 0.062976 |
| 290.8 | 0.52535  | 0.530053 | 0.547533 | 0.56639  | 0.577125 | 0.585295 | 1.27642  | 0.606243 | 0.221179 | 0.108481 | 0.063341 |
| 290.9 | 0.515613 | 0.520315 | 0.537795 | 0.557175 | 0.567008 | 0.57551  | 1.26274  | 0.596743 | 0.217151 | 0.106039 | 0.064686 |
| 291   | 0.505495 | 0.510198 | 0.527583 | 0.548055 | 0.556795 | 0.564918 | 1.2464   | 0.586958 | 0.213123 | 0.103721 | 0.065902 |
| 291.1 | 0.495995 | 0.500698 | 0.517845 | 0.53903  | 0.546915 | 0.55518  | 1.227685 | 0.577363 | 0.209095 | 0.10128  | 0.066149 |
| 291.2 | 0.48735  | 0.491958 | 0.5092   | 0.530053 | 0.538318 | 0.54644  | 1.207355 | 0.567815 | 0.205067 | 0.099085 | 0.064073 |
| 291.3 | 0.478515 | 0.48317  | 0.500318 | 0.520648 | 0.529435 | 0.53732  | 1.18807  | 0.558173 | 0.201039 | 0.096891 | 0.062244 |
| 291.4 | 0.469761 | 0.474573 | 0.491673 | 0.51167  | 0.520553 | 0.528675 | 1.169545 | 0.548435 | 0.196764 | 0.094698 | 0.060534 |
| 291.5 | 0.460764 | 0.465818 | 0.483075 | 0.50255  | 0.51167  | 0.519413 | 1.15178  | 0.538413 | 0.192508 | 0.092623 | 0.058824 |

|       |          |          |          |          |          |          |          |          |          |          |          |
|-------|----------|----------|----------|----------|----------|----------|----------|----------|----------|----------|----------|
| 291.6 | 0.45164  | 0.457064 | 0.474202 | 0.493288 | 0.50255  | 0.510435 | 1.13468  | 0.528533 | 0.188119 | 0.090427 | 0.057238 |
| 291.7 | 0.442885 | 0.448433 | 0.465571 | 0.484405 | 0.493668 | 0.50141  | 1.118055 | 0.51832  | 0.183726 | 0.088109 | 0.055532 |
| 291.8 | 0.434008 | 0.439556 | 0.45657  | 0.47519  | 0.484928 | 0.492433 | 1.10219  | 0.508298 | 0.179335 | 0.086034 | 0.053946 |
| 291.9 | 0.425006 | 0.430431 | 0.447692 | 0.466065 | 0.476045 | 0.48355  | 1.086705 | 0.49818  | 0.174821 | 0.083593 | 0.052112 |
| 292   | 0.416129 | 0.421553 | 0.438938 | 0.457064 | 0.467296 | 0.474573 | 1.071885 | 0.488158 | 0.170307 | 0.081154 | 0.050526 |
| 292.1 | 0.407251 | 0.412799 | 0.43006  | 0.448186 | 0.458665 | 0.466189 | 1.057445 | 0.478278 | 0.166037 | 0.078835 | 0.048939 |
| 292.2 | 0.398497 | 0.404045 | 0.421306 | 0.439309 | 0.449787 | 0.457682 | 1.043385 | 0.468426 | 0.161644 | 0.076273 | 0.047235 |
| 292.3 | 0.389742 | 0.39529  | 0.412428 | 0.430431 | 0.441033 | 0.449174 | 1.02999  | 0.458788 | 0.157618 | 0.074076 | 0.046015 |
| 292.4 | 0.381235 | 0.386536 | 0.403798 | 0.422047 | 0.432402 | 0.440786 | 1.016785 | 0.449151 | 0.153471 | 0.071636 | 0.045771 |
| 292.5 | 0.372851 | 0.378029 | 0.39529  | 0.41354  | 0.424018 | 0.432279 | 1.00282  | 0.440002 | 0.149445 | 0.069318 | 0.045526 |
| 292.6 | 0.364838 | 0.370016 | 0.38703  | 0.405774 | 0.416129 | 0.424389 | 0.988    | 0.430977 | 0.145542 | 0.067121 | 0.044916 |
| 292.7 | 0.357314 | 0.362492 | 0.379511 | 0.39825  | 0.408733 | 0.416746 | 0.9728   | 0.42219  | 0.141637 | 0.064803 | 0.044428 |
| 292.8 | 0.349918 | 0.354972 | 0.371987 | 0.390854 | 0.401332 | 0.409593 | 0.95684  | 0.413407 | 0.137733 | 0.062485 | 0.042597 |
| 292.9 | 0.342641 | 0.3477   | 0.364838 | 0.3837   | 0.394184 | 0.402567 | 0.941593 | 0.404748 | 0.134074 | 0.060411 | 0.040645 |
| 293   | 0.335246 | 0.3403   | 0.357561 | 0.376675 | 0.386907 | 0.39529  | 0.927314 | 0.396207 | 0.130536 | 0.058458 | 0.039669 |
| 293.1 | 0.328092 | 0.333151 | 0.350536 | 0.369769 | 0.379877 | 0.388631 | 0.913045 | 0.387667 | 0.12712  | 0.056628 | 0.038204 |
| 293.2 | 0.321067 | 0.326244 | 0.343506 | 0.363109 | 0.373098 | 0.381853 | 0.899498 | 0.379373 | 0.123947 | 0.055041 | 0.03674  |
| 293.3 | 0.314037 | 0.319214 | 0.336599 | 0.356454 | 0.366315 | 0.375193 | 0.886445 | 0.37108  | 0.120654 | 0.053333 | 0.035886 |
| 293.4 | 0.307259 | 0.31256  | 0.329945 | 0.349918 | 0.359779 | 0.368904 | 0.873639 | 0.363271 | 0.117604 | 0.051991 | 0.034544 |
| 293.5 | 0.300352 | 0.305653 | 0.323162 | 0.343259 | 0.353248 | 0.362373 | 0.861318 | 0.355462 | 0.114431 | 0.050283 | 0.033567 |
| 293.6 | 0.293693 | 0.299241 | 0.316749 | 0.33697  | 0.346836 | 0.356454 | 0.849357 | 0.347776 | 0.11126  | 0.048696 | 0.032835 |
| 293.7 | 0.287157 | 0.292833 | 0.31046  | 0.330557 | 0.340547 | 0.350165 | 0.837406 | 0.34058  | 0.108332 | 0.047111 | 0.031493 |
| 293.8 | 0.281119 | 0.286544 | 0.304423 | 0.324644 | 0.334752 | 0.344741 | 0.826054 | 0.333626 | 0.105404 | 0.045401 | 0.031005 |
| 293.9 | 0.274954 | 0.280502 | 0.298628 | 0.318849 | 0.328957 | 0.339069 | 0.814711 | 0.327038 | 0.102598 | 0.043938 | 0.030151 |
| 294   | 0.269282 | 0.274954 | 0.293322 | 0.313177 | 0.323903 | 0.333764 | 0.803615 | 0.320454 | 0.099913 | 0.042474 | 0.029052 |
| 294.1 | 0.263977 | 0.269772 | 0.288268 | 0.307871 | 0.318967 | 0.328957 | 0.792994 | 0.313866 | 0.097231 | 0.041131 | 0.028076 |
| 294.2 | 0.258429 | 0.264471 | 0.283091 | 0.302323 | 0.313913 | 0.323903 | 0.782506 | 0.307154 | 0.094546 | 0.039667 | 0.02649  |
| 294.3 | 0.253128 | 0.259293 | 0.277666 | 0.296899 | 0.308983 | 0.319091 | 0.772987 | 0.300813 | 0.092106 | 0.038447 | 0.025392 |
| 294.4 | 0.24758  | 0.253869 | 0.272118 | 0.291721 | 0.303805 | 0.31416  | 0.763838 | 0.29459  | 0.089422 | 0.037227 | 0.024538 |
| 294.5 | 0.242155 | 0.248568 | 0.266694 | 0.286667 | 0.298628 | 0.309353 | 0.754937 | 0.288615 | 0.086982 | 0.036006 | 0.023805 |
| 294.6 | 0.237101 | 0.243632 | 0.261758 | 0.281856 | 0.29394  | 0.304789 | 0.746273 | 0.283    | 0.084542 | 0.034908 | 0.023317 |
| 294.7 | 0.232042 | 0.238825 | 0.256828 | 0.277172 | 0.289256 | 0.299982 | 0.737609 | 0.277391 | 0.082103 | 0.033688 | 0.022707 |
| 294.8 | 0.227112 | 0.233895 | 0.252021 | 0.272607 | 0.284691 | 0.295545 | 0.729315 | 0.272142 | 0.079906 | 0.03259  | 0.022097 |
| 294.9 | 0.222428 | 0.22933  | 0.24758  | 0.268171 | 0.280255 | 0.291351 | 0.721012 | 0.267021 | 0.07771  | 0.031492 | 0.021609 |
| 295   | 0.217617 | 0.224647 | 0.242896 | 0.263858 | 0.275937 | 0.287157 | 0.712966 | 0.26202  | 0.075514 | 0.030515 | 0.02112  |
| 295.1 | 0.21318  | 0.22021  | 0.238578 | 0.259664 | 0.271624 | 0.283338 | 0.704786 | 0.25726  | 0.073441 | 0.029417 | 0.020388 |
| 295.2 | 0.208862 | 0.216139 | 0.234389 | 0.255716 | 0.267677 | 0.27939  | 0.697101 | 0.252748 | 0.071611 | 0.028563 | 0.0199   |
| 295.3 | 0.204796 | 0.211945 | 0.230442 | 0.252021 | 0.263858 | 0.275814 | 0.689415 | 0.248601 | 0.069779 | 0.027587 | 0.019168 |
| 295.4 | 0.200726 | 0.208003 | 0.226618 | 0.248321 | 0.260158 | 0.271995 | 0.681977 | 0.244573 | 0.068073 | 0.02661  | 0.01868  |
| 295.5 | 0.19703  | 0.204302 | 0.222922 | 0.244867 | 0.256581 | 0.268665 | 0.674538 | 0.24055  | 0.066365 | 0.025756 | 0.018192 |
| 295.6 | 0.193577 | 0.200973 | 0.219716 | 0.241538 | 0.253498 | 0.265829 | 0.66709  | 0.236769 | 0.064657 | 0.024902 | 0.016971 |
| 295.7 | 0.190247 | 0.197643 | 0.216633 | 0.238084 | 0.250539 | 0.262746 | 0.660507 | 0.232864 | 0.062949 | 0.024048 | 0.015995 |
| 295.8 | 0.186917 | 0.194313 | 0.213551 | 0.234759 | 0.24758  | 0.260034 | 0.654645 | 0.229202 | 0.061484 | 0.023194 | 0.014897 |

|       |          |          |          |          |          |          |          |          |          |          |          |
|-------|----------|----------|----------|----------|----------|----------|----------|----------|----------|----------|----------|
| 295.9 | 0.183835 | 0.191235 | 0.210591 | 0.231553 | 0.244867 | 0.257322 | 0.649648 | 0.225787 | 0.060143 | 0.022584 | 0.014165 |
| 296   | 0.180381 | 0.187905 | 0.207262 | 0.22847  | 0.241661 | 0.254239 | 0.64525  | 0.222495 | 0.058801 | 0.021974 | 0.014043 |
| 296.1 | 0.177299 | 0.184823 | 0.204179 | 0.225635 | 0.238702 | 0.251527 | 0.640614 | 0.219322 | 0.057581 | 0.021364 | 0.013677 |
| 296.2 | 0.174339 | 0.18174  | 0.201343 | 0.222799 | 0.23599  | 0.248815 | 0.636101 | 0.216272 | 0.05636  | 0.020754 | 0.013555 |
| 296.3 | 0.17138  | 0.178904 | 0.198507 | 0.22021  | 0.233277 | 0.246349 | 0.631465 | 0.213465 | 0.055018 | 0.020021 | 0.013067 |
| 296.4 | 0.168544 | 0.176315 | 0.195795 | 0.217864 | 0.230936 | 0.244003 | 0.626953 | 0.210663 | 0.05392  | 0.019411 | 0.012701 |
| 296.5 | 0.165832 | 0.173727 | 0.193206 | 0.215522 | 0.228594 | 0.241785 | 0.62244  | 0.208098 | 0.0527   | 0.018679 | 0.012212 |
| 296.6 | 0.163243 | 0.17138  | 0.190741 | 0.213304 | 0.226371 | 0.23969  | 0.618051 | 0.205537 | 0.051724 | 0.018069 | 0.011968 |
| 296.7 | 0.160778 | 0.168915 | 0.188399 | 0.211085 | 0.224153 | 0.237595 | 0.613776 | 0.203096 | 0.050749 | 0.017703 | 0.011724 |
| 296.8 | 0.158189 | 0.16645  | 0.186053 | 0.20862  | 0.221811 | 0.235619 | 0.609511 | 0.200778 | 0.049772 | 0.017215 | 0.01148  |
| 296.9 | 0.155848 | 0.164231 | 0.183835 | 0.206521 | 0.21984  | 0.233524 | 0.605236 | 0.19846  | 0.048796 | 0.016727 | 0.011236 |
| 297   | 0.153629 | 0.162013 | 0.181616 | 0.204426 | 0.21774  | 0.231677 | 0.601094 | 0.196265 | 0.047943 | 0.016239 | 0.01087  |
| 297.1 | 0.15153  | 0.160037 | 0.179645 | 0.202578 | 0.215892 | 0.229948 | 0.596942 | 0.194194 | 0.047211 | 0.015873 | 0.010748 |
| 297.2 | 0.149806 | 0.158436 | 0.17804  | 0.200849 | 0.214415 | 0.228347 | 0.592791 | 0.192119 | 0.046356 | 0.015507 | 0.009894 |
| 297.3 | 0.147834 | 0.156465 | 0.176068 | 0.198754 | 0.212563 | 0.226741 | 0.589257 | 0.19029  | 0.045382 | 0.015263 | 0.009162 |
| 297.4 | 0.146105 | 0.15486  | 0.174586 | 0.19703  | 0.211085 | 0.225141 | 0.58596  | 0.188338 | 0.044527 | 0.014774 | 0.008308 |
| 297.5 | 0.144381 | 0.153259 | 0.173109 | 0.195425 | 0.209603 | 0.223782 | 0.583405 | 0.186751 | 0.043917 | 0.014409 | 0.007942 |
| 297.6 | 0.142652 | 0.151283 | 0.171257 | 0.1937   | 0.207879 | 0.222181 | 0.581324 | 0.185165 | 0.04355  | 0.014286 | 0.008064 |
| 297.7 | 0.141051 | 0.149682 | 0.169656 | 0.192342 | 0.206397 | 0.220699 | 0.579006 | 0.183459 | 0.043185 | 0.01392  | 0.008186 |
| 297.8 | 0.139322 | 0.147953 | 0.167932 | 0.190865 | 0.20492  | 0.219469 | 0.576688 | 0.181992 | 0.042454 | 0.013555 | 0.008064 |
| 297.9 | 0.137722 | 0.146352 | 0.166326 | 0.189383 | 0.203561 | 0.217864 | 0.57437  | 0.180405 | 0.041965 | 0.01331  | 0.007942 |
| 298   | 0.135997 | 0.144994 | 0.164849 | 0.188029 | 0.202208 | 0.216633 | 0.571929 | 0.178942 | 0.041232 | 0.012822 | 0.007819 |
| 298.1 | 0.134515 | 0.14364  | 0.163614 | 0.186794 | 0.201096 | 0.215522 | 0.569497 | 0.177603 | 0.040622 | 0.012456 | 0.007575 |
| 298.2 | 0.133162 | 0.142282 | 0.162502 | 0.185559 | 0.199866 | 0.214415 | 0.567179 | 0.17614  | 0.040012 | 0.01209  | 0.007453 |
| 298.3 | 0.131803 | 0.141051 | 0.161149 | 0.184452 | 0.198754 | 0.213551 | 0.564737 | 0.174919 | 0.039524 | 0.011846 | 0.007209 |
| 298.4 | 0.130568 | 0.13994  | 0.160161 | 0.183341 | 0.197643 | 0.212316 | 0.562419 | 0.173698 | 0.038914 | 0.011602 | 0.006965 |
| 298.5 | 0.129214 | 0.138586 | 0.15893  | 0.182234 | 0.196289 | 0.211209 | 0.560225 | 0.172601 | 0.038671 | 0.01148  | 0.006843 |
| 298.6 | 0.127856 | 0.137351 | 0.157695 | 0.181122 | 0.195301 | 0.210097 | 0.558021 | 0.171504 | 0.038061 | 0.011236 | 0.006599 |
| 298.7 | 0.126502 | 0.136244 | 0.156342 | 0.179887 | 0.194194 | 0.208986 | 0.555703 | 0.170283 | 0.037573 | 0.010992 | 0.006599 |
| 298.8 | 0.125391 | 0.135256 | 0.155354 | 0.178904 | 0.193206 | 0.208126 | 0.553508 | 0.169428 | 0.037329 | 0.01087  | 0.006355 |
| 298.9 | 0.124531 | 0.134268 | 0.154366 | 0.177793 | 0.192465 | 0.207385 | 0.551437 | 0.168331 | 0.036841 | 0.010504 | 0.005989 |
| 299   | 0.123543 | 0.133409 | 0.153506 | 0.176928 | 0.191601 | 0.206521 | 0.549604 | 0.167476 | 0.036719 | 0.010504 | 0.005867 |
| 299.1 | 0.122555 | 0.132421 | 0.152765 | 0.175945 | 0.190865 | 0.205784 | 0.548017 | 0.166255 | 0.036231 | 0.01026  | 0.005379 |
| 299.2 | 0.121695 | 0.131433 | 0.1519   | 0.17508  | 0.19     | 0.205043 | 0.546678 | 0.165405 | 0.035864 | 0.009893 | 0.005379 |
| 299.3 | 0.120707 | 0.130568 | 0.151036 | 0.174216 | 0.189136 | 0.204179 | 0.545338 | 0.164303 | 0.035376 | 0.009772 | 0.005257 |
| 299.4 | 0.12009  | 0.129955 | 0.1503   | 0.17348  | 0.188518 | 0.203561 | 0.544113 | 0.163571 | 0.035011 | 0.009528 | 0.005135 |
| 299.5 | 0.119225 | 0.128967 | 0.149559 | 0.172615 | 0.187658 | 0.202825 | 0.54302  | 0.163087 | 0.034766 | 0.009528 | 0.005135 |
| 299.6 | 0.118365 | 0.128103 | 0.148694 | 0.171874 | 0.186794 | 0.201961 | 0.541795 | 0.162355 | 0.034523 | 0.009406 | 0.005013 |
| 299.7 | 0.117624 | 0.127367 | 0.147834 | 0.171133 | 0.186176 | 0.201343 | 0.540579 | 0.161742 | 0.03428  | 0.009284 | 0.004891 |
| 299.8 | 0.116883 | 0.126502 | 0.147093 | 0.17052  | 0.18544  | 0.200479 | 0.539363 | 0.161011 | 0.033913 | 0.009284 | 0.004891 |
| 299.9 | 0.116019 | 0.125761 | 0.146229 | 0.169656 | 0.184576 | 0.199619 | 0.538014 | 0.160279 | 0.033425 | 0.00904  | 0.004647 |
| 300   | 0.115406 | 0.125144 | 0.145611 | 0.169162 | 0.183958 | 0.199248 | 0.536798 | 0.159671 | 0.033303 | 0.008918 | 0.004647 |
| 300.1 | 0.114542 | 0.124284 | 0.144875 | 0.168421 | 0.183217 | 0.198384 | 0.535572 | 0.158935 | 0.033182 | 0.008674 | 0.004525 |

|       |          |          |          |          |          |          |          |          |          |          |          |
|-------|----------|----------|----------|----------|----------|----------|----------|----------|----------|----------|----------|
| 300.2 | 0.113924 | 0.12379  | 0.144258 | 0.167932 | 0.182481 | 0.198137 | 0.534233 | 0.158204 | 0.032815 | 0.00843  | 0.004281 |
| 300.3 | 0.113554 | 0.123419 | 0.143764 | 0.167438 | 0.182234 | 0.197766 | 0.53314  | 0.157719 | 0.032815 | 0.008552 | 0.004403 |
| 300.4 | 0.112941 | 0.122925 | 0.14327  | 0.166697 | 0.181616 | 0.197272 | 0.532038 | 0.157353 | 0.032693 | 0.008674 | 0.004525 |
| 300.5 | 0.112447 | 0.122431 | 0.142776 | 0.166079 | 0.181122 | 0.196783 | 0.530936 | 0.156741 | 0.032327 | 0.008674 | 0.004403 |
| 300.6 | 0.111706 | 0.121937 | 0.142405 | 0.165338 | 0.180752 | 0.196042 | 0.529967 | 0.156251 | 0.032083 | 0.00843  | 0.004403 |
| 300.7 | 0.111088 | 0.121201 | 0.141669 | 0.164602 | 0.180011 | 0.195425 | 0.528865 | 0.155401 | 0.031717 | 0.008186 | 0.004037 |
| 300.8 | 0.110347 | 0.120584 | 0.141175 | 0.163984 | 0.179398 | 0.19456  | 0.52801  | 0.154912 | 0.03135  | 0.007942 | 0.003915 |
| 300.9 | 0.109858 | 0.119843 | 0.140434 | 0.163243 | 0.178657 | 0.194194 | 0.527402 | 0.154546 | 0.03135  | 0.007942 | 0.004159 |
| 301   | 0.109117 | 0.119225 | 0.139816 | 0.162873 | 0.178163 | 0.1937   | 0.526424 | 0.153938 | 0.031107 | 0.00782  | 0.003793 |
| 301.1 | 0.108623 | 0.118736 | 0.139322 | 0.162502 | 0.177793 | 0.193206 | 0.525692 | 0.153568 | 0.030985 | 0.007698 | 0.003793 |
| 301.2 | 0.108129 | 0.118242 | 0.13871  | 0.162137 | 0.177299 | 0.192959 | 0.524837 | 0.153202 | 0.03074  | 0.007698 | 0.003793 |
| 301.3 | 0.107759 | 0.117748 | 0.138216 | 0.161766 | 0.176928 | 0.192218 | 0.523868 | 0.152717 | 0.030497 | 0.007454 | 0.003427 |
| 301.4 | 0.107269 | 0.117254 | 0.137598 | 0.161025 | 0.176192 | 0.191848 | 0.523137 | 0.15247  | 0.030254 | 0.007454 | 0.003427 |
| 301.5 | 0.106528 | 0.116636 | 0.136981 | 0.160284 | 0.175451 | 0.191112 | 0.522158 | 0.151862 | 0.030009 | 0.007332 | 0.003305 |
| 301.6 | 0.106034 | 0.116142 | 0.136487 | 0.15979  | 0.174957 | 0.190494 | 0.52155  | 0.15162  | 0.03013  | 0.007332 | 0.003427 |
| 301.7 | 0.10554  | 0.1159   | 0.135997 | 0.159301 | 0.174463 | 0.190247 | 0.520819 | 0.151254 | 0.030009 | 0.007454 | 0.003671 |
| 301.8 | 0.10517  | 0.115653 | 0.13575  | 0.159054 | 0.174092 | 0.18963  | 0.519964 | 0.150884 | 0.029887 | 0.007331 | 0.003549 |
| 301.9 | 0.104799 | 0.115159 | 0.135256 | 0.15856  | 0.173727 | 0.189383 | 0.519232 | 0.150518 | 0.029644 | 0.007209 | 0.003549 |
| 302   | 0.104552 | 0.114912 | 0.135009 | 0.158189 | 0.173356 | 0.189012 | 0.518377 | 0.150034 | 0.02952  | 0.007209 | 0.003305 |
| 302.1 | 0.104187 | 0.114418 | 0.134639 | 0.157942 | 0.172986 | 0.188765 | 0.517646 | 0.149668 | 0.029399 | 0.007209 | 0.003061 |
| 302.2 | 0.10394  | 0.114171 | 0.134515 | 0.157572 | 0.172739 | 0.188889 | 0.517152 | 0.149421 | 0.029399 | 0.007331 | 0.003061 |
| 302.3 | 0.103693 | 0.113924 | 0.134268 | 0.157325 | 0.172368 | 0.188642 | 0.516544 | 0.149055 | 0.029399 | 0.007209 | 0.003061 |
| 302.4 | 0.103199 | 0.11343  | 0.133774 | 0.157078 | 0.171998 | 0.188276 | 0.515936 | 0.148813 | 0.029156 | 0.007087 | 0.00306  |
| 302.5 | 0.102952 | 0.113183 | 0.133404 | 0.156584 | 0.171751 | 0.187782 | 0.515328 | 0.148324 | 0.029032 | 0.006843 | 0.003182 |
| 302.6 | 0.102581 | 0.112694 | 0.133038 | 0.156342 | 0.171504 | 0.187288 | 0.51471  | 0.148081 | 0.028789 | 0.006721 | 0.003182 |
| 302.7 | 0.102211 | 0.112447 | 0.132544 | 0.155971 | 0.171133 | 0.187041 | 0.514102 | 0.147716 | 0.028667 | 0.006599 | 0.003061 |
| 302.8 | 0.102087 | 0.1122   | 0.132421 | 0.155601 | 0.171014 | 0.18667  | 0.513494 | 0.147469 | 0.028546 | 0.006477 | 0.003061 |
| 302.9 | 0.102087 | 0.1122   | 0.132297 | 0.155601 | 0.170891 | 0.18667  | 0.512886 | 0.147103 | 0.028546 | 0.006477 | 0.002938 |
| 303   | 0.101717 | 0.112076 | 0.131927 | 0.155354 | 0.17052  | 0.1863   | 0.512278 | 0.146861 | 0.028422 | 0.006477 | 0.002816 |
| 303.1 | 0.101593 | 0.111706 | 0.131803 | 0.155107 | 0.17015  | 0.185929 | 0.511784 | 0.146737 | 0.028546 | 0.006721 | 0.003182 |
| 303.2 | 0.101351 | 0.111459 | 0.13168  | 0.15486  | 0.169903 | 0.185929 | 0.511176 | 0.146371 | 0.028301 | 0.006721 | 0.00306  |
| 303.3 | 0.10098  | 0.111088 | 0.131309 | 0.154613 | 0.169409 | 0.185317 | 0.510445 | 0.146006 | 0.028057 | 0.006477 | 0.002938 |
| 303.4 | 0.10098  | 0.110841 | 0.131186 | 0.154366 | 0.169285 | 0.18544  | 0.50996  | 0.145887 | 0.028057 | 0.006477 | 0.002938 |
| 303.5 | 0.10061  | 0.110594 | 0.130815 | 0.153995 | 0.169038 | 0.18507  | 0.509229 | 0.145398 | 0.027936 | 0.006233 | 0.002694 |
| 303.6 | 0.100486 | 0.110594 | 0.130692 | 0.153872 | 0.168791 | 0.18507  | 0.508611 | 0.145274 | 0.027936 | 0.006111 | 0.002694 |
| 303.7 | 0.100486 | 0.110594 | 0.130692 | 0.153748 | 0.168791 | 0.18507  | 0.508127 | 0.145274 | 0.027936 | 0.005989 | 0.002572 |
| 303.8 | 0.100239 | 0.110471 | 0.130568 | 0.153506 | 0.168421 | 0.184576 | 0.507756 | 0.145151 | 0.027936 | 0.006111 | 0.002572 |
| 303.9 | 0.100116 | 0.110224 | 0.130202 | 0.153259 | 0.167932 | 0.184452 | 0.507395 | 0.144908 | 0.027936 | 0.006111 | 0.002572 |
| 304   | 0.099869 | 0.109858 | 0.129832 | 0.152888 | 0.167685 | 0.183958 | 0.506911 | 0.144666 | 0.027812 | 0.005989 | 0.002328 |
| 304.1 | 0.099622 | 0.109611 | 0.129585 | 0.152765 | 0.167561 | 0.183835 | 0.506664 | 0.144419 | 0.027691 | 0.006233 | 0.002572 |
| 304.2 | 0.099375 | 0.109488 | 0.129461 | 0.152394 | 0.167314 | 0.183711 | 0.506293 | 0.1443   | 0.027812 | 0.006233 | 0.002572 |
| 304.3 | 0.099251 | 0.109241 | 0.129214 | 0.152394 | 0.167314 | 0.183341 | 0.505809 | 0.144177 | 0.027569 | 0.006355 | 0.00245  |
| 304.4 | 0.099004 | 0.109241 | 0.129214 | 0.152271 | 0.167191 | 0.183341 | 0.505438 | 0.143811 | 0.027569 | 0.006355 | 0.00245  |



|       |          |          |          |          |          |          |          |          |          |          |          |
|-------|----------|----------|----------|----------|----------|----------|----------|----------|----------|----------|----------|
| 304.5 | 0.098881 | 0.109117 | 0.129091 | 0.152147 | 0.167067 | 0.183094 | 0.504954 | 0.143688 | 0.027569 | 0.006233 | 0.00245  |
| 304.6 | 0.098757 | 0.108994 | 0.128967 | 0.152024 | 0.166944 | 0.18297  | 0.504469 | 0.143569 | 0.027447 | 0.006111 | 0.002572 |
| 304.7 | 0.098515 | 0.108994 | 0.128967 | 0.151777 | 0.166697 | 0.18297  | 0.503852 | 0.14308  | 0.027202 | 0.005867 | 0.00245  |
| 304.8 | 0.098268 | 0.108623 | 0.128597 | 0.151406 | 0.16645  | 0.182357 | 0.503614 | 0.14308  | 0.027202 | 0.005989 | 0.002572 |
| 304.9 | 0.098145 | 0.1085   | 0.128473 | 0.151159 | 0.166079 | 0.182357 | 0.50312  | 0.142833 | 0.027081 | 0.005867 | 0.002572 |
| 305   | 0.098145 | 0.108376 | 0.128226 | 0.150912 | 0.165956 | 0.18211  | 0.502636 | 0.14259  | 0.026959 | 0.005867 | 0.002328 |
| 305.1 | 0.098021 | 0.108129 | 0.127979 | 0.150789 | 0.165585 | 0.181863 | 0.502389 | 0.14259  | 0.026959 | 0.005989 | 0.002572 |
| 305.2 | 0.098145 | 0.108129 | 0.127856 | 0.150789 | 0.165462 | 0.181987 | 0.502028 | 0.142348 | 0.026959 | 0.005989 | 0.00245  |
| 305.3 | 0.098021 | 0.107882 | 0.127856 | 0.150547 | 0.165462 | 0.18174  | 0.501657 | 0.142101 | 0.026959 | 0.005989 | 0.002328 |
| 305.4 | 0.097898 | 0.107759 | 0.127732 | 0.150547 | 0.165338 | 0.18174  | 0.50142  | 0.142101 | 0.026959 | 0.005989 | 0.002206 |
| 305.5 | 0.097651 | 0.107512 | 0.12749  | 0.1503   | 0.165219 | 0.181369 | 0.501049 | 0.141859 | 0.026959 | 0.005867 | 0.002206 |
| 305.6 | 0.097404 | 0.107269 | 0.127367 | 0.149929 | 0.164972 | 0.181246 | 0.500565 | 0.141493 | 0.026716 | 0.005745 | 0.001962 |
| 305.7 | 0.09728  | 0.107388 | 0.127243 | 0.149929 | 0.164725 | 0.181122 | 0.500318 | 0.14137  | 0.026592 | 0.005745 | 0.001962 |
| 305.8 | 0.097033 | 0.107146 | 0.126873 | 0.149435 | 0.164478 | 0.180628 | 0.499957 | 0.141127 | 0.026716 | 0.005623 | 0.00184  |
| 305.9 | 0.09691  | 0.107146 | 0.126996 | 0.149435 | 0.164355 | 0.180752 | 0.49971  | 0.141127 | 0.026716 | 0.005623 | 0.001962 |
| 306   | 0.096786 | 0.106899 | 0.126626 | 0.149188 | 0.164231 | 0.180381 | 0.499463 | 0.141127 | 0.026716 | 0.005623 | 0.002084 |
| 306.1 | 0.09691  | 0.106775 | 0.126626 | 0.149312 | 0.164231 | 0.180505 | 0.499216 | 0.141251 | 0.026716 | 0.005623 | 0.002206 |
| 306.2 | 0.096786 | 0.106652 | 0.126749 | 0.149312 | 0.164108 | 0.180505 | 0.498978 | 0.141251 | 0.026716 | 0.005623 | 0.002206 |
| 306.3 | 0.096416 | 0.106405 | 0.126379 | 0.149065 | 0.163737 | 0.180134 | 0.498608 | 0.140885 | 0.026592 | 0.005623 | 0.002084 |
| 306.4 | 0.096416 | 0.106405 | 0.126502 | 0.149065 | 0.163614 | 0.180258 | 0.498247 | 0.140638 | 0.026349 | 0.005501 | 0.001962 |
| 306.5 | 0.096292 | 0.106405 | 0.126255 | 0.148941 | 0.16349  | 0.179764 | 0.498    | 0.140519 | 0.026349 | 0.005501 | 0.002084 |
| 306.6 | 0.096169 | 0.106158 | 0.126008 | 0.148571 | 0.16312  | 0.179645 | 0.497639 | 0.140396 | 0.026349 | 0.005257 | 0.001962 |
| 306.7 | 0.096292 | 0.106158 | 0.126008 | 0.148571 | 0.16312  | 0.179645 | 0.497392 | 0.140396 | 0.026228 | 0.005257 | 0.002084 |
| 306.8 | 0.096416 | 0.106158 | 0.126008 | 0.148447 | 0.163243 | 0.179398 | 0.497268 | 0.140519 | 0.026592 | 0.005501 | 0.002206 |
| 306.9 | 0.096169 | 0.105911 | 0.125761 | 0.148077 | 0.162873 | 0.179275 | 0.496898 | 0.140272 | 0.026592 | 0.005379 | 0.00184  |
| 307   | 0.096045 | 0.105664 | 0.125514 | 0.147953 | 0.162873 | 0.179028 | 0.496784 | 0.140272 | 0.026471 | 0.005501 | 0.002084 |
| 307.1 | 0.095798 | 0.10554  | 0.125391 | 0.147711 | 0.162502 | 0.178904 | 0.496413 | 0.14003  | 0.026471 | 0.005501 | 0.00184  |
| 307.2 | 0.095432 | 0.105293 | 0.12502  | 0.147464 | 0.162137 | 0.178534 | 0.496166 | 0.139907 | 0.026104 | 0.005379 | 0.001962 |
| 307.3 | 0.095432 | 0.105417 | 0.124897 | 0.147464 | 0.162013 | 0.178534 | 0.495929 | 0.14003  | 0.026104 | 0.005379 | 0.002084 |
| 307.4 | 0.095432 | 0.105293 | 0.124773 | 0.147217 | 0.161766 | 0.178657 | 0.495558 | 0.139907 | 0.026106 | 0.005257 | 0.001962 |
| 307.5 | 0.095432 | 0.105293 | 0.124897 | 0.147093 | 0.161766 | 0.17841  | 0.495321 | 0.139907 | 0.026104 | 0.005257 | 0.002084 |
| 307.6 | 0.095432 | 0.10517  | 0.124654 | 0.147093 | 0.16189  | 0.17841  | 0.495074 | 0.139907 | 0.026228 | 0.005257 | 0.001962 |
| 307.7 | 0.095062 | 0.105046 | 0.124407 | 0.146723 | 0.161643 | 0.177916 | 0.494703 | 0.139664 | 0.026228 | 0.005257 | 0.00184  |
| 307.8 | 0.094938 | 0.104799 | 0.124284 | 0.146599 | 0.161519 | 0.177669 | 0.494466 | 0.139664 | 0.026349 | 0.005257 | 0.00184  |
| 307.9 | 0.095062 | 0.104923 | 0.124284 | 0.146846 | 0.161643 | 0.177916 | 0.494095 | 0.139541 | 0.026349 | 0.005135 | 0.001596 |
| 308   | 0.094815 | 0.104923 | 0.12416  | 0.146723 | 0.161396 | 0.177669 | 0.493848 | 0.139417 | 0.026349 | 0.005257 | 0.001718 |
| 308.1 | 0.094938 | 0.104923 | 0.12416  | 0.146723 | 0.161396 | 0.177916 | 0.493611 | 0.139417 | 0.026228 | 0.005379 | 0.001718 |
| 308.2 | 0.094938 | 0.104799 | 0.12416  | 0.146599 | 0.161272 | 0.177546 | 0.493364 | 0.139417 | 0.026104 | 0.005501 | 0.001962 |
| 308.3 | 0.094938 | 0.104676 | 0.124037 | 0.146352 | 0.161149 | 0.177422 | 0.493003 | 0.139175 | 0.025983 | 0.005501 | 0.001962 |
| 308.4 | 0.094938 | 0.104676 | 0.124037 | 0.146352 | 0.161149 | 0.177422 | 0.492756 | 0.139175 | 0.025861 | 0.005501 | 0.002084 |
| 308.5 | 0.094938 | 0.104676 | 0.123913 | 0.146352 | 0.161025 | 0.177052 | 0.492509 | 0.139052 | 0.025861 | 0.005501 | 0.002084 |
| 308.6 | 0.094691 | 0.104429 | 0.123666 | 0.146105 | 0.160655 | 0.177175 | 0.492262 | 0.139052 | 0.025861 | 0.005501 | 0.001962 |
| 308.7 | 0.094444 | 0.104187 | 0.123543 | 0.145982 | 0.160531 | 0.176809 | 0.491901 | 0.138933 | 0.025739 | 0.005379 | 0.001962 |

|       |          |          |          |          |          |          |          |          |          |          |          |
|-------|----------|----------|----------|----------|----------|----------|----------|----------|----------|----------|----------|
| 308.8 | 0.094444 | 0.104187 | 0.123419 | 0.145982 | 0.160531 | 0.176809 | 0.49153  | 0.138809 | 0.025739 | 0.005257 | 0.00184  |
| 308.9 | 0.094197 | 0.103693 | 0.123296 | 0.145611 | 0.160161 | 0.176562 | 0.491046 | 0.138567 | 0.025618 | 0.005135 | 0.001718 |
| 309   | 0.094197 | 0.103693 | 0.123296 | 0.145611 | 0.160161 | 0.176439 | 0.490799 | 0.13832  | 0.025618 | 0.005135 | 0.001718 |
| 309.1 | 0.09395  | 0.103693 | 0.123172 | 0.145611 | 0.15979  | 0.176439 | 0.490438 | 0.138201 | 0.025618 | 0.005013 | 0.001718 |
| 309.2 | 0.093827 | 0.103693 | 0.123049 | 0.145364 | 0.159543 | 0.175945 | 0.490067 | 0.137954 | 0.025494 | 0.005013 | 0.001474 |
| 309.3 | 0.093827 | 0.103816 | 0.123049 | 0.145241 | 0.159543 | 0.175821 | 0.489944 | 0.138078 | 0.025618 | 0.005135 | 0.001718 |
| 309.4 | 0.093703 | 0.103569 | 0.122678 | 0.144994 | 0.159301 | 0.175574 | 0.489706 | 0.138201 | 0.025739 | 0.005257 | 0.00184  |
| 309.5 | 0.09358  | 0.103322 | 0.122431 | 0.144628 | 0.159054 | 0.175327 | 0.489459 | 0.138078 | 0.025739 | 0.005257 | 0.001962 |
| 309.6 | 0.093333 | 0.103199 | 0.122308 | 0.144381 | 0.158807 | 0.175327 | 0.489212 | 0.138201 | 0.025739 | 0.005257 | 0.002084 |
| 309.7 | 0.093209 | 0.102952 | 0.122184 | 0.144011 | 0.15856  | 0.17508  | 0.488975 | 0.138201 | 0.025739 | 0.005257 | 0.001962 |
| 309.8 | 0.093209 | 0.102952 | 0.122184 | 0.143887 | 0.15856  | 0.17508  | 0.488604 | 0.137954 | 0.025618 | 0.005135 | 0.00184  |
| 309.9 | 0.093209 | 0.102705 | 0.122061 | 0.143764 | 0.158313 | 0.174833 | 0.488367 | 0.137836 | 0.025494 | 0.005135 | 0.001962 |
| 310   | 0.093086 | 0.102705 | 0.121937 | 0.14364  | 0.158436 | 0.17471  | 0.487996 | 0.137712 | 0.025373 | 0.005013 | 0.00184  |
| 310.1 | 0.093086 | 0.102581 | 0.121814 | 0.143764 | 0.158313 | 0.174586 | 0.487626 | 0.13747  | 0.025251 | 0.005013 | 0.001962 |
| 310.2 | 0.093086 | 0.102458 | 0.121695 | 0.143517 | 0.158066 | 0.174092 | 0.487265 | 0.13747  | 0.025373 | 0.005013 | 0.00184  |
| 310.3 | 0.093086 | 0.102458 | 0.121572 | 0.14327  | 0.158189 | 0.174092 | 0.486894 | 0.137346 | 0.025373 | 0.004891 | 0.001962 |
| 310.4 | 0.092962 | 0.102458 | 0.121325 | 0.143393 | 0.158066 | 0.173727 | 0.48641  | 0.137223 | 0.025373 | 0.004891 | 0.00184  |
| 310.5 | 0.09272  | 0.102458 | 0.121325 | 0.143146 | 0.157819 | 0.17348  | 0.485925 | 0.137104 | 0.025251 | 0.004891 | 0.00184  |
| 310.6 | 0.092597 | 0.102334 | 0.121201 | 0.143146 | 0.157695 | 0.173603 | 0.485431 | 0.136857 | 0.025129 | 0.004891 | 0.001962 |
| 310.7 | 0.092597 | 0.102211 | 0.121078 | 0.143146 | 0.157572 | 0.173356 | 0.484823 | 0.136615 | 0.025008 | 0.004769 | 0.00184  |
| 310.8 | 0.092597 | 0.102087 | 0.121078 | 0.142899 | 0.157448 | 0.17348  | 0.484462 | 0.136857 | 0.025129 | 0.004891 | 0.00184  |
| 310.9 | 0.09272  | 0.101964 | 0.120954 | 0.142776 | 0.157201 | 0.173356 | 0.483968 | 0.136615 | 0.025008 | 0.004891 | 0.00184  |
| 311   | 0.092597 | 0.101964 | 0.120831 | 0.142652 | 0.157078 | 0.173109 | 0.483607 | 0.136491 | 0.025129 | 0.004891 | 0.001962 |
| 311.1 | 0.092473 | 0.102087 | 0.120831 | 0.142529 | 0.156954 | 0.173233 | 0.483113 | 0.136249 | 0.025008 | 0.004769 | 0.00184  |
| 311.2 | 0.092473 | 0.101964 | 0.120831 | 0.142405 | 0.156831 | 0.172862 | 0.482629 | 0.136002 | 0.024884 | 0.004769 | 0.001962 |
| 311.3 | 0.092226 | 0.101717 | 0.120584 | 0.142282 | 0.156589 | 0.172739 | 0.482021 | 0.135883 | 0.024884 | 0.004647 | 0.00184  |
| 311.4 | 0.092226 | 0.101717 | 0.120584 | 0.142158 | 0.156589 | 0.172739 | 0.48165  | 0.135883 | 0.025008 | 0.004647 | 0.001718 |
| 311.5 | 0.092103 | 0.101593 | 0.12046  | 0.142158 | 0.156465 | 0.172492 | 0.481289 | 0.13576  | 0.025008 | 0.004647 | 0.00184  |
| 311.6 | 0.091979 | 0.101593 | 0.120337 | 0.142039 | 0.156218 | 0.172245 | 0.480919 | 0.135636 | 0.025008 | 0.004769 | 0.001962 |
| 311.7 | 0.091979 | 0.101717 | 0.120213 | 0.141792 | 0.155971 | 0.171874 | 0.480434 | 0.135394 | 0.024884 | 0.004769 | 0.001962 |
| 311.8 | 0.091856 | 0.10147  | 0.12009  | 0.141669 | 0.155601 | 0.171751 | 0.479826 | 0.135271 | 0.024884 | 0.005013 | 0.002206 |
| 311.9 | 0.091979 | 0.10147  | 0.119966 | 0.141669 | 0.155477 | 0.171627 | 0.479085 | 0.135152 | 0.024763 | 0.005013 | 0.001962 |
| 312   | 0.092103 | 0.10147  | 0.119966 | 0.141422 | 0.155477 | 0.171504 | 0.478477 | 0.135152 | 0.024763 | 0.005135 | 0.002084 |
| 312.1 | 0.091856 | 0.10098  | 0.119596 | 0.141051 | 0.155354 | 0.171257 | 0.477622 | 0.134905 | 0.024763 | 0.005012 | 0.00184  |
| 312.2 | 0.091609 | 0.100857 | 0.119349 | 0.140928 | 0.155107 | 0.170644 | 0.476891 | 0.134786 | 0.024641 | 0.005013 | 0.001718 |
| 312.3 | 0.091115 | 0.100486 | 0.118978 | 0.140557 | 0.154613 | 0.170397 | 0.476283 | 0.134786 | 0.024641 | 0.005134 | 0.002084 |
| 312.4 | 0.091115 | 0.100486 | 0.119102 | 0.140557 | 0.154489 | 0.170273 | 0.475428 | 0.134539 | 0.02452  | 0.005012 | 0.001962 |
| 312.5 | 0.091238 | 0.100486 | 0.119102 | 0.140557 | 0.154366 | 0.170273 | 0.474573 | 0.134173 | 0.024398 | 0.004769 | 0.00184  |
| 312.6 | 0.091238 | 0.100486 | 0.119225 | 0.140434 | 0.154489 | 0.170397 | 0.473965 | 0.134055 | 0.02452  | 0.004769 | 0.00184  |
| 312.7 | 0.091238 | 0.100239 | 0.119102 | 0.140187 | 0.154242 | 0.169903 | 0.473357 | 0.133808 | 0.024641 | 0.004768 | 0.00184  |
| 312.8 | 0.091238 | 0.100239 | 0.118978 | 0.140187 | 0.154119 | 0.169903 | 0.472625 | 0.133689 | 0.024641 | 0.004768 | 0.00184  |
| 312.9 | 0.090991 | 0.100116 | 0.118736 | 0.140063 | 0.153872 | 0.169532 | 0.472017 | 0.133442 | 0.024641 | 0.00489  | 0.001962 |
| 313   | 0.090868 | 0.099992 | 0.118489 | 0.139816 | 0.153506 | 0.169409 | 0.471162 | 0.133076 | 0.024398 | 0.004646 | 0.001962 |

|       |          |          |          |          |          |          |          |          |          |          |          |
|-------|----------|----------|----------|----------|----------|----------|----------|----------|----------|----------|----------|
| 313.1 | 0.090744 | 0.099992 | 0.118365 | 0.139569 | 0.153506 | 0.169162 | 0.470307 | 0.132953 | 0.024274 | 0.004646 | 0.001718 |
| 313.2 | 0.090497 | 0.099622 | 0.117995 | 0.139322 | 0.153135 | 0.168791 | 0.469699 | 0.132834 | 0.024274 | 0.004646 | 0.001962 |
| 313.3 | 0.090374 | 0.099498 | 0.117871 | 0.138957 | 0.152765 | 0.168668 | 0.468844 | 0.13271  | 0.024153 | 0.004524 | 0.001962 |
| 313.4 | 0.09025  | 0.099498 | 0.117748 | 0.138833 | 0.152394 | 0.168297 | 0.467866 | 0.132345 | 0.024031 | 0.004524 | 0.001962 |
| 313.5 | 0.09025  | 0.099375 | 0.117624 | 0.138586 | 0.152147 | 0.168179 | 0.466887 | 0.131979 | 0.02391  | 0.004524 | 0.002083 |
| 313.6 | 0.090374 | 0.099375 | 0.117624 | 0.138463 | 0.152024 | 0.167808 | 0.465795 | 0.131613 | 0.023788 | 0.004402 | 0.002083 |
| 313.7 | 0.09025  | 0.099128 | 0.117377 | 0.138339 | 0.1519   | 0.167438 | 0.464693 | 0.131371 | 0.023788 | 0.004402 | 0.002083 |
| 313.8 | 0.090127 | 0.098881 | 0.117254 | 0.138092 | 0.151653 | 0.167314 | 0.463838 | 0.131247 | 0.024031 | 0.004524 | 0.002327 |
| 313.9 | 0.08988  | 0.098757 | 0.117007 | 0.137969 | 0.15153  | 0.166944 | 0.462859 | 0.131124 | 0.024153 | 0.004646 | 0.002327 |
| 314   | 0.089637 | 0.098757 | 0.116883 | 0.137845 | 0.151283 | 0.167067 | 0.461767 | 0.130882 | 0.024031 | 0.004646 | 0.002205 |
| 314.1 | 0.08939  | 0.098515 | 0.116636 | 0.137475 | 0.150912 | 0.166697 | 0.460665 | 0.130392 | 0.024031 | 0.004402 | 0.002083 |
| 314.2 | 0.089267 | 0.098392 | 0.116389 | 0.137104 | 0.15067  | 0.166326 | 0.459572 | 0.13015  | 0.023788 | 0.004402 | 0.002083 |
| 314.3 | 0.08902  | 0.098021 | 0.116019 | 0.136734 | 0.150176 | 0.165956 | 0.45847  | 0.129784 | 0.023543 | 0.00428  | 0.001961 |
| 314.4 | 0.08902  | 0.098021 | 0.115777 | 0.136487 | 0.149806 | 0.165462 | 0.457492 | 0.129537 | 0.023543 | 0.004402 | 0.002083 |
| 314.5 | 0.08902  | 0.098021 | 0.115777 | 0.136487 | 0.149682 | 0.165338 | 0.456523 | 0.129419 | 0.023543 | 0.004646 | 0.002083 |
| 314.6 | 0.08902  | 0.097898 | 0.1159   | 0.136487 | 0.149559 | 0.165219 | 0.455421 | 0.129053 | 0.023421 | 0.004402 | 0.001961 |
| 314.7 | 0.08902  | 0.097898 | 0.115777 | 0.136487 | 0.149559 | 0.165096 | 0.454328 | 0.128687 | 0.023421 | 0.004402 | 0.001839 |
| 314.8 | 0.088896 | 0.097651 | 0.115653 | 0.136244 | 0.149312 | 0.164849 | 0.45335  | 0.128321 | 0.023421 | 0.004524 | 0.001961 |
| 314.9 | 0.088773 | 0.097527 | 0.115406 | 0.135997 | 0.149188 | 0.164478 | 0.452371 | 0.128074 | 0.023543 | 0.004646 | 0.002083 |
| 315   | 0.088526 | 0.09728  | 0.115036 | 0.135627 | 0.148818 | 0.164355 | 0.451393 | 0.127956 | 0.023788 | 0.004768 | 0.002449 |
| 315.1 | 0.088649 | 0.09728  | 0.115159 | 0.135503 | 0.148694 | 0.164108 | 0.450177 | 0.12759  | 0.023665 | 0.004646 | 0.00237  |
| 315.2 | 0.088402 | 0.09728  | 0.114912 | 0.135256 | 0.148447 | 0.163737 | 0.448837 | 0.127466 | 0.023788 | 0.004768 | 0.00229  |
| 315.3 | 0.088402 | 0.097157 | 0.114912 | 0.135256 | 0.148447 | 0.163737 | 0.447374 | 0.126977 | 0.023543 | 0.004402 | 0.00221  |
| 315.4 | 0.088402 | 0.097033 | 0.114789 | 0.134886 | 0.148077 | 0.163243 | 0.446025 | 0.126611 | 0.023421 | 0.00428  | 0.002131 |
| 315.5 | 0.088279 | 0.09691  | 0.114542 | 0.134639 | 0.147711 | 0.162996 | 0.444562 | 0.126246 | 0.023421 | 0.00428  | 0.002051 |
| 315.6 | 0.088155 | 0.096663 | 0.114418 | 0.134392 | 0.147587 | 0.162626 | 0.443223 | 0.125638 | 0.023178 | 0.004036 | 0.001972 |
| 315.7 | 0.088032 | 0.096539 | 0.114048 | 0.134021 | 0.14734  | 0.16226  | 0.44176  | 0.125272 | 0.023055 | 0.003914 | 0.001892 |
| 315.8 | 0.087785 | 0.096292 | 0.113801 | 0.133774 | 0.146846 | 0.162013 | 0.44042  | 0.125025 | 0.023055 | 0.003792 | 0.001812 |
| 315.9 | 0.087661 | 0.096045 | 0.11343  | 0.133527 | 0.146476 | 0.161396 | 0.439195 | 0.12454  | 0.023055 | 0.003792 | 0.001733 |
| 316   | 0.087538 | 0.095922 | 0.113183 | 0.133285 | 0.146105 | 0.161272 | 0.437855 | 0.12417  | 0.022933 | 0.003792 | 0.001653 |
| 316.1 | 0.087538 | 0.095922 | 0.113307 | 0.133162 | 0.145982 | 0.161025 | 0.43663  | 0.123928 | 0.023055 | 0.003914 | 0.001574 |
| 316.2 | 0.087414 | 0.095798 | 0.113183 | 0.132915 | 0.145735 | 0.160655 | 0.43529  | 0.12332  | 0.022811 | 0.004036 | 0.001494 |
| 316.3 | 0.087044 | 0.095675 | 0.11306  | 0.132544 | 0.145364 | 0.160284 | 0.433951 | 0.123073 | 0.022811 | 0.003914 | 0.001414 |
| 316.4 | 0.086802 | 0.095432 | 0.112694 | 0.132174 | 0.144994 | 0.159543 | 0.432488 | 0.122588 | 0.02269  | 0.003792 | 0.001335 |
| 316.5 | 0.086555 | 0.095185 | 0.112323 | 0.131803 | 0.144628 | 0.159424 | 0.431148 | 0.122099 | 0.022568 | 0.003792 | 0.001255 |
| 316.6 | 0.086431 | 0.095309 | 0.1122   | 0.13168  | 0.144505 | 0.159054 | 0.429676 | 0.121857 | 0.022568 | 0.003914 | 0.001176 |
| 316.7 | 0.086431 | 0.095185 | 0.111953 | 0.13168  | 0.144381 | 0.159054 | 0.428089 | 0.121244 | 0.022445 | 0.003913 | 0.001096 |
| 316.8 | 0.086184 | 0.094691 | 0.111459 | 0.131309 | 0.143764 | 0.158683 | 0.426389 | 0.120636 | 0.022323 | 0.003913 | 0.001016 |
| 316.9 | 0.086184 | 0.094568 | 0.111459 | 0.131062 | 0.14364  | 0.158066 | 0.424802 | 0.120389 | 0.022445 | 0.004035 | 0.000937 |
| 317   | 0.086061 | 0.094197 | 0.111212 | 0.130692 | 0.143146 | 0.157942 | 0.423092 | 0.119904 | 0.022202 | 0.004035 | 0.000857 |
| 317.1 | 0.085937 | 0.09395  | 0.111212 | 0.130326 | 0.142899 | 0.157448 | 0.421382 | 0.119657 | 0.022323 | 0.004157 | 0.000778 |
| 317.2 | 0.086061 | 0.09395  | 0.111335 | 0.130202 | 0.143023 | 0.157448 | 0.419672 | 0.119415 | 0.022208 | 0.004035 | 0.000698 |
| 317.3 | 0.08569  | 0.093827 | 0.110965 | 0.129955 | 0.142529 | 0.157078 | 0.417972 | 0.118926 | 0.022208 | 0.004035 | 0.000618 |

|       |          |          |          |          |          |          |          |          |          |          |          |
|-------|----------|----------|----------|----------|----------|----------|----------|----------|----------|----------|----------|
| 317.4 | 0.08569  | 0.093703 | 0.110718 | 0.129832 | 0.142282 | 0.156589 | 0.416262 | 0.118441 | 0.02208  | 0.003913 | 0.000539 |
| 317.5 | 0.085443 | 0.09358  | 0.110347 | 0.129461 | 0.141792 | 0.156342 | 0.414675 | 0.117952 | 0.021958 | 0.003913 | 0.00074  |
| 317.6 | 0.08532  | 0.093333 | 0.109982 | 0.129091 | 0.141422 | 0.155724 | 0.412842 | 0.117339 | 0.021835 | 0.003791 | 0.000618 |
| 317.7 | 0.08532  | 0.093333 | 0.109982 | 0.129091 | 0.141051 | 0.155724 | 0.411255 | 0.116974 | 0.021835 | 0.003913 | 0.00074  |
| 317.8 | 0.085196 | 0.093333 | 0.109611 | 0.128844 | 0.140681 | 0.155354 | 0.409792 | 0.116731 | 0.021958 | 0.004035 | 0.000984 |
| 317.9 | 0.084949 | 0.093086 | 0.109364 | 0.128597 | 0.14031  | 0.15486  | 0.408206 | 0.116123 | 0.021958 | 0.004035 | 0.000984 |
| 318   | 0.084826 | 0.092839 | 0.109241 | 0.128473 | 0.14031  | 0.154736 | 0.406619 | 0.115392 | 0.021958 | 0.004035 | 0.000984 |
| 318.1 | 0.084826 | 0.092597 | 0.109117 | 0.128103 | 0.140063 | 0.153995 | 0.404909 | 0.115268 | 0.021958 | 0.004157 | 0.001106 |
| 318.2 | 0.084455 | 0.09235  | 0.108994 | 0.127732 | 0.139693 | 0.153629 | 0.402962 | 0.114537 | 0.021713 | 0.004035 | 0.000984 |
| 318.3 | 0.084332 | 0.091979 | 0.10887  | 0.127367 | 0.139446 | 0.153259 | 0.401014 | 0.114048 | 0.02147  | 0.004035 | 0.000984 |
| 318.4 | 0.084208 | 0.091732 | 0.1085   | 0.126996 | 0.138957 | 0.152641 | 0.399057 | 0.113805 | 0.021347 | 0.004035 | 0.000984 |
| 318.5 | 0.084208 | 0.091609 | 0.108376 | 0.126873 | 0.13871  | 0.152765 | 0.396986 | 0.11295  | 0.020982 | 0.003913 | 0.000862 |
| 318.6 | 0.084208 | 0.091362 | 0.108129 | 0.126379 | 0.138339 | 0.152147 | 0.395153 | 0.112585 | 0.021103 | 0.004035 | 0.000984 |
| 318.7 | 0.083966 | 0.091362 | 0.107759 | 0.126255 | 0.138092 | 0.1519   | 0.393082 | 0.112095 | 0.02086  | 0.003913 | 0.000862 |
| 318.8 | 0.083595 | 0.091238 | 0.107388 | 0.125885 | 0.137475 | 0.151406 | 0.391125 | 0.111487 | 0.02086  | 0.003791 | 0.00074  |
| 318.9 | 0.083225 | 0.090991 | 0.107022 | 0.125514 | 0.137104 | 0.150789 | 0.389301 | 0.110998 | 0.020982 | 0.003913 | 0.000862 |
| 319   | 0.082854 | 0.090621 | 0.106775 | 0.125144 | 0.13661  | 0.150423 | 0.387467 | 0.110509 | 0.020982 | 0.003791 | 0.000862 |
| 319.1 | 0.082607 | 0.09025  | 0.106528 | 0.124654 | 0.136121 | 0.149806 | 0.385634 | 0.110024 | 0.020982 | 0.003669 | 0.000984 |
| 319.2 | 0.08236  | 0.08988  | 0.106281 | 0.124284 | 0.13575  | 0.149435 | 0.38381  | 0.109535 | 0.020982 | 0.003669 | 0.001106 |
| 319.3 | 0.08199  | 0.089514 | 0.105911 | 0.12379  | 0.135133 | 0.148694 | 0.3821   | 0.109046 | 0.02086  | 0.003668 | 0.001106 |
| 319.4 | 0.082113 | 0.089514 | 0.10554  | 0.123543 | 0.135009 | 0.1482   | 0.380266 | 0.108557 | 0.02086  | 0.003668 | 0.000984 |
| 319.5 | 0.081866 | 0.08939  | 0.105293 | 0.123419 | 0.134515 | 0.147834 | 0.378566 | 0.108191 | 0.020982 | 0.003912 | 0.001106 |
| 319.6 | 0.081866 | 0.089267 | 0.105046 | 0.123172 | 0.134392 | 0.14734  | 0.376609 | 0.107459 | 0.02086  | 0.00379  | 0.000862 |
| 319.7 | 0.081619 | 0.08902  | 0.104676 | 0.122678 | 0.134021 | 0.147217 | 0.374538 | 0.106851 | 0.020615 | 0.003546 | 0.000618 |
| 319.8 | 0.081496 | 0.088649 | 0.104429 | 0.122431 | 0.133527 | 0.146723 | 0.372457 | 0.106243 | 0.020127 | 0.003668 | 0.000496 |
| 319.9 | 0.081372 | 0.088402 | 0.10431  | 0.122308 | 0.133285 | 0.146352 | 0.370386 | 0.105754 | 0.020005 | 0.003668 | 0.000496 |
| 320   | 0.081249 | 0.088155 | 0.104063 | 0.121937 | 0.132668 | 0.145982 | 0.368192 | 0.105141 | 0.019762 | 0.003546 | 0.000496 |
| 320.1 | 0.08113  | 0.088032 | 0.10394  | 0.121814 | 0.132421 | 0.145364 | 0.365997 | 0.104533 | 0.01964  | 0.003546 | 0.000495 |
| 320.2 | 0.081007 | 0.087908 | 0.103693 | 0.121695 | 0.13205  | 0.145241 | 0.363926 | 0.103802 | 0.019762 | 0.003546 | 0.000495 |
| 320.3 | 0.08076  | 0.087785 | 0.103446 | 0.121078 | 0.131556 | 0.144628 | 0.361722 | 0.103194 | 0.01964  | 0.003302 | 0.000373 |
| 320.4 | 0.080389 | 0.087414 | 0.102952 | 0.120707 | 0.131186 | 0.144258 | 0.359898 | 0.102828 | 0.019884 | 0.003668 | 0.000739 |
| 320.5 | 0.080389 | 0.087167 | 0.102705 | 0.12046  | 0.130939 | 0.144011 | 0.357704 | 0.102092 | 0.019762 | 0.003546 | 0.000617 |
| 320.6 | 0.080142 | 0.087044 | 0.102581 | 0.119966 | 0.130449 | 0.143393 | 0.355747 | 0.101726 | 0.01964  | 0.003668 | 0.000739 |
| 320.7 | 0.080142 | 0.086802 | 0.102458 | 0.119719 | 0.130326 | 0.143023 | 0.353676 | 0.100995 | 0.019517 | 0.003546 | 0.000617 |
| 320.8 | 0.079895 | 0.086678 | 0.102087 | 0.119349 | 0.129708 | 0.142282 | 0.351481 | 0.100263 | 0.019274 | 0.003302 | 0.000373 |
| 320.9 | 0.079895 | 0.086802 | 0.10184  | 0.118978 | 0.129585 | 0.142039 | 0.349524 | 0.100021 | 0.019274 | 0.003424 | 0.000373 |
| 321   | 0.079895 | 0.086678 | 0.101593 | 0.118736 | 0.129338 | 0.141792 | 0.347577 | 0.099532 | 0.019395 | 0.003424 | 0.000373 |
| 321.1 | 0.079895 | 0.086555 | 0.101351 | 0.118612 | 0.129091 | 0.141422 | 0.34562  | 0.099042 | 0.019395 | 0.003424 | 0.000495 |
| 321.2 | 0.079772 | 0.086431 | 0.101351 | 0.118365 | 0.128967 | 0.141298 | 0.343672 | 0.098558 | 0.019395 | 0.003668 | 0.000617 |
| 321.3 | 0.079648 | 0.086061 | 0.101104 | 0.118118 | 0.12835  | 0.140681 | 0.341354 | 0.097579 | 0.019152 | 0.003424 | 0.000617 |
| 321.4 | 0.079278 | 0.08569  | 0.100857 | 0.117748 | 0.127979 | 0.140187 | 0.33916  | 0.097095 | 0.01903  | 0.003301 | 0.000617 |
| 321.5 | 0.079031 | 0.085443 | 0.10061  | 0.117377 | 0.12749  | 0.139693 | 0.336956 | 0.096482 | 0.018786 | 0.003301 | 0.000739 |
| 321.6 | 0.078537 | 0.085196 | 0.100239 | 0.117007 | 0.126996 | 0.138957 | 0.334638 | 0.095874 | 0.018421 | 0.003301 | 0.000495 |

|       |          |          |          |          |          |          |          |          |          |          |          |
|-------|----------|----------|----------|----------|----------|----------|----------|----------|----------|----------|----------|
| 321.7 | 0.078413 | 0.084949 | 0.099992 | 0.116636 | 0.126873 | 0.138586 | 0.332443 | 0.095261 | 0.018421 | 0.003057 | 0.000617 |
| 321.8 | 0.078171 | 0.084579 | 0.099498 | 0.116266 | 0.126255 | 0.137969 | 0.330125 | 0.09453  | 0.018177 | 0.003057 | 0.000617 |
| 321.9 | 0.078047 | 0.084332 | 0.099251 | 0.115653 | 0.125761 | 0.137475 | 0.327807 | 0.093922 | 0.018177 | 0.002935 | 0.000373 |
| 322   | 0.078171 | 0.084332 | 0.099251 | 0.11553  | 0.125514 | 0.137351 | 0.325613 | 0.093314 | 0.018177 | 0.002813 | 0.000495 |
| 322.1 | 0.077924 | 0.084089 | 0.098881 | 0.115036 | 0.124897 | 0.136734 | 0.323665 | 0.093067 | 0.018299 | 0.003301 | 0.000739 |
| 322.2 | 0.077553 | 0.083842 | 0.098515 | 0.114542 | 0.124407 | 0.136244 | 0.321461 | 0.092578 | 0.018299 | 0.003179 | 0.000617 |
| 322.3 | 0.077183 | 0.083348 | 0.098145 | 0.114295 | 0.12379  | 0.135627 | 0.319267 | 0.09197  | 0.018299 | 0.003179 | 0.000494 |
| 322.4 | 0.076812 | 0.082978 | 0.097651 | 0.113801 | 0.123172 | 0.135009 | 0.317072 | 0.091238 | 0.018055 | 0.003057 | 0.000494 |
| 322.5 | 0.076442 | 0.082607 | 0.09728  | 0.11343  | 0.122802 | 0.134515 | 0.314754 | 0.090383 | 0.017811 | 0.002813 | 0.000372 |
| 322.6 | 0.076318 | 0.082237 | 0.097157 | 0.113183 | 0.122431 | 0.134145 | 0.312683 | 0.089775 | 0.017811 | 0.002813 | 0.000372 |
| 322.7 | 0.075948 | 0.08236  | 0.09691  | 0.112817 | 0.122184 | 0.134145 | 0.310612 | 0.089286 | 0.017811 | 0.002813 | 0.000616 |
| 322.8 | 0.075948 | 0.082237 | 0.09691  | 0.11257  | 0.121814 | 0.133527 | 0.308408 | 0.088797 | 0.017689 | 0.002691 | 0.000494 |
| 322.9 | 0.075824 | 0.081866 | 0.096416 | 0.1122   | 0.121325 | 0.133038 | 0.306214 | 0.088312 | 0.017689 | 0.002691 | 0.000494 |
| 323   | 0.075701 | 0.081743 | 0.096169 | 0.111706 | 0.120831 | 0.132421 | 0.303772 | 0.087699 | 0.017445 | 0.002569 | 0.000372 |
| 323.1 | 0.075701 | 0.081372 | 0.095798 | 0.111459 | 0.12046  | 0.13168  | 0.301454 | 0.087091 | 0.017323 | 0.002447 | 0.000372 |
| 323.2 | 0.075335 | 0.08113  | 0.095309 | 0.111088 | 0.12009  | 0.131433 | 0.299022 | 0.08636  | 0.017079 | 0.002447 | 0.000128 |
| 323.3 | 0.075335 | 0.08113  | 0.095309 | 0.110965 | 0.119843 | 0.130939 | 0.296818 | 0.085628 | 0.017079 | 0.00269  | 0.000372 |
| 323.4 | 0.074965 | 0.080636 | 0.094815 | 0.110347 | 0.119225 | 0.130568 | 0.294624 | 0.085139 | 0.017079 | 0.002812 | 0.000494 |
| 323.5 | 0.074718 | 0.080389 | 0.094321 | 0.109858 | 0.118736 | 0.129955 | 0.292306 | 0.08465  | 0.017079 | 0.002812 | 0.00025  |
| 323.6 | 0.074471 | 0.080142 | 0.094074 | 0.109364 | 0.118365 | 0.129091 | 0.290235 | 0.084284 | 0.017323 | 0.002934 | 0.000616 |
| 323.7 | 0.0741   | 0.079772 | 0.093703 | 0.10887  | 0.117871 | 0.12872  | 0.287917 | 0.0838   | 0.017079 | 0.00269  | 0.000494 |
| 323.8 | 0.0741   | 0.079648 | 0.093456 | 0.108747 | 0.117501 | 0.128103 | 0.285475 | 0.082945 | 0.016835 | 0.002568 | 0.000372 |
| 323.9 | 0.073977 | 0.079401 | 0.093209 | 0.108253 | 0.117007 | 0.127609 | 0.283404 | 0.082455 | 0.016713 | 0.002812 | 0.000616 |
| 324   | 0.07373  | 0.079154 | 0.092839 | 0.107882 | 0.116636 | 0.127243 | 0.281086 | 0.081724 | 0.016591 | 0.002812 | 0.000494 |
| 324.1 | 0.073483 | 0.079031 | 0.092597 | 0.107759 | 0.116266 | 0.126502 | 0.279006 | 0.081235 | 0.016713 | 0.002934 | 0.000616 |
| 324.2 | 0.073112 | 0.078784 | 0.092226 | 0.107388 | 0.1159   | 0.126255 | 0.276935 | 0.080869 | 0.016835 | 0.003056 | 0.000738 |
| 324.3 | 0.072742 | 0.07829  | 0.091856 | 0.106899 | 0.115283 | 0.125391 | 0.27474  | 0.080261 | 0.016835 | 0.003056 | 0.000616 |
| 324.4 | 0.072618 | 0.078171 | 0.091609 | 0.106652 | 0.114912 | 0.125144 | 0.272422 | 0.079648 | 0.016713 | 0.002812 | 0.000494 |
| 324.5 | 0.072376 | 0.077677 | 0.091115 | 0.106158 | 0.114295 | 0.124654 | 0.269981 | 0.078917 | 0.016469 | 0.00269  | 0.000372 |
| 324.6 | 0.072129 | 0.077183 | 0.090868 | 0.105664 | 0.113677 | 0.123913 | 0.267663 | 0.078066 | 0.016347 | 0.002568 | 0.000371 |
| 324.7 | 0.071882 | 0.076936 | 0.090621 | 0.10517  | 0.113183 | 0.123666 | 0.265221 | 0.077454 | 0.016103 | 0.002324 | 0.000249 |
| 324.8 | 0.071388 | 0.076565 | 0.090127 | 0.104676 | 0.112447 | 0.122925 | 0.263027 | 0.077088 | 0.015981 | 0.002446 | 0.000493 |
| 324.9 | 0.071388 | 0.076565 | 0.090003 | 0.10431  | 0.1122   | 0.122802 | 0.260832 | 0.076722 | 0.016103 | 0.00269  | 0.000615 |
| 325   | 0.071141 | 0.076318 | 0.089761 | 0.104063 | 0.111829 | 0.122308 | 0.258514 | 0.076233 | 0.015981 | 0.002568 | 0.000615 |
| 325.1 | 0.071017 | 0.076071 | 0.08939  | 0.103816 | 0.111459 | 0.121695 | 0.256073 | 0.075501 | 0.015737 | 0.002446 | 0.000371 |
| 325.2 | 0.070647 | 0.075701 | 0.08902  | 0.103199 | 0.110841 | 0.121201 | 0.253755 | 0.07477  | 0.015615 | 0.002324 | 0.000371 |
| 325.3 | 0.070153 | 0.075212 | 0.088526 | 0.102828 | 0.110347 | 0.120337 | 0.251437 | 0.074038 | 0.015493 | 0.002324 | 0.000249 |
| 325.4 | 0.070153 | 0.075088 | 0.088279 | 0.102458 | 0.109982 | 0.119966 | 0.249119 | 0.07343  | 0.015493 | 0.002445 | 0.000249 |
| 325.5 | 0.069782 | 0.074841 | 0.088032 | 0.101964 | 0.109611 | 0.119349 | 0.246801 | 0.072818 | 0.015371 | 0.002445 | 0.000249 |
| 325.6 | 0.069906 | 0.074965 | 0.088032 | 0.102087 | 0.109611 | 0.118978 | 0.244606 | 0.072333 | 0.015493 | 0.002689 | 0.000249 |
| 325.7 | 0.069782 | 0.074841 | 0.087908 | 0.101717 | 0.109117 | 0.118612 | 0.242288 | 0.071602 | 0.015371 | 0.002689 | 0.000249 |
| 325.8 | 0.06954  | 0.074471 | 0.087538 | 0.101351 | 0.108623 | 0.117871 | 0.240094 | 0.071112 | 0.015371 | 0.002567 | 0.000127 |
| 325.9 | 0.069417 | 0.074224 | 0.087291 | 0.101104 | 0.108253 | 0.117624 | 0.238013 | 0.070747 | 0.015493 | 0.002567 | 0.000493 |

|       |          |          |          |          |          |          |          |          |          |          |          |
|-------|----------|----------|----------|----------|----------|----------|----------|----------|----------|----------|----------|
| 326   | 0.069046 | 0.073853 | 0.086678 | 0.100486 | 0.107759 | 0.117007 | 0.235819 | 0.070134 | 0.015493 | 0.002567 | 0.000493 |
| 326.1 | 0.068799 | 0.073359 | 0.086184 | 0.099869 | 0.107269 | 0.116389 | 0.233501 | 0.069526 | 0.015249 | 0.002445 | 0.000493 |
| 326.2 | 0.068676 | 0.073236 | 0.085937 | 0.099622 | 0.106899 | 0.116142 | 0.231306 | 0.068671 | 0.015127 | 0.002567 | 0.000615 |
| 326.3 | 0.068552 | 0.072989 | 0.085567 | 0.099128 | 0.106528 | 0.115653 | 0.228988 | 0.068063 | 0.015005 | 0.002567 | 0.000371 |
| 326.4 | 0.068305 | 0.072618 | 0.08532  | 0.098634 | 0.106034 | 0.115406 | 0.226547 | 0.067331 | 0.014639 | 0.002445 | 0.000127 |
| 326.5 | 0.068182 | 0.072495 | 0.08532  | 0.098515 | 0.105664 | 0.115159 | 0.224352 | 0.066719 | 0.014761 | 0.002445 | 0.000127 |
| 326.6 | 0.067935 | 0.072252 | 0.084826 | 0.098021 | 0.10517  | 0.114295 | 0.221911 | 0.066111 | 0.014517 | 0.002323 | -0.00012 |
| 326.7 | 0.067811 | 0.072129 | 0.084579 | 0.097774 | 0.104799 | 0.114048 | 0.219593 | 0.065379 | 0.014395 | 0.002079 | 4.47E-06 |
| 326.8 | 0.067811 | 0.072129 | 0.084455 | 0.097774 | 0.104552 | 0.11343  | 0.217398 | 0.064771 | 0.014517 | 0.002079 | 0.000126 |
| 326.9 | 0.067564 | 0.071758 | 0.083966 | 0.097404 | 0.104187 | 0.11306  | 0.215327 | 0.064282 | 0.014517 | 0.002079 | 0.00037  |
| 327   | 0.067194 | 0.071388 | 0.083595 | 0.097033 | 0.103693 | 0.11257  | 0.213133 | 0.063669 | 0.014517 | 0.002079 | 0.000248 |
| 327.1 | 0.066947 | 0.071264 | 0.083472 | 0.096786 | 0.103322 | 0.1122   | 0.210938 | 0.063061 | 0.014395 | 0.002201 | 0.00037  |
| 327.2 | 0.066704 | 0.071017 | 0.082978 | 0.096292 | 0.102828 | 0.111706 | 0.208734 | 0.06233  | 0.014395 | 0.002201 | 0.000248 |
| 327.3 | 0.066704 | 0.07077  | 0.082854 | 0.096045 | 0.102458 | 0.111088 | 0.20654  | 0.061722 | 0.014273 | 0.0022   | 0.000248 |
| 327.4 | 0.066581 | 0.070647 | 0.082731 | 0.095675 | 0.102211 | 0.110841 | 0.204345 | 0.061109 | 0.014151 | 0.0022   | 0.000126 |
| 327.5 | 0.066457 | 0.070276 | 0.082484 | 0.095432 | 0.101593 | 0.110224 | 0.202027 | 0.060254 | 0.013907 | 0.001956 | 4.11E-06 |
| 327.6 | 0.066334 | 0.070153 | 0.08236  | 0.095062 | 0.101351 | 0.109858 | 0.20008  | 0.059888 | 0.013907 | 0.002078 | 0.000248 |
| 327.7 | 0.066087 | 0.070029 | 0.082113 | 0.094691 | 0.100857 | 0.109611 | 0.197999 | 0.05928  | 0.013907 | 0.002078 | 0.000248 |
| 327.8 | 0.065716 | 0.069659 | 0.081866 | 0.094444 | 0.100363 | 0.108994 | 0.196175 | 0.059038 | 0.014029 | 0.002322 | 0.000614 |
| 327.9 | 0.065593 | 0.06954  | 0.081496 | 0.09395  | 0.100116 | 0.10887  | 0.194218 | 0.058549 | 0.014151 | 0.002444 | 0.000736 |
| 328   | 0.065469 | 0.06917  | 0.08113  | 0.09358  | 0.099622 | 0.108376 | 0.192024 | 0.057817 | 0.013907 | 0.0022   | 0.000614 |
| 328.1 | 0.065346 | 0.068923 | 0.08076  | 0.093456 | 0.099251 | 0.107759 | 0.189829 | 0.057204 | 0.013785 | 0.002078 | 0.000492 |
| 328.2 | 0.065222 | 0.068676 | 0.080513 | 0.092962 | 0.098881 | 0.107388 | 0.187635 | 0.056473 | 0.013541 | 0.001834 | 0.00037  |
| 328.3 | 0.064852 | 0.068305 | 0.080142 | 0.092473 | 0.098268 | 0.106528 | 0.18544  | 0.055741 | 0.013297 | 0.001712 | 0.000248 |
| 328.4 | 0.064728 | 0.068182 | 0.079895 | 0.092103 | 0.098021 | 0.106281 | 0.18336  | 0.055133 | 0.013175 | 0.001712 | 0.000126 |
| 328.5 | 0.064358 | 0.067935 | 0.079648 | 0.091856 | 0.097651 | 0.105911 | 0.181536 | 0.054644 | 0.013297 | 0.002078 | 0.000126 |
| 328.6 | 0.064111 | 0.067688 | 0.079278 | 0.091485 | 0.09728  | 0.105293 | 0.179455 | 0.054036 | 0.013175 | 0.001956 | 0.000126 |
| 328.7 | 0.063864 | 0.067441 | 0.078907 | 0.091115 | 0.09691  | 0.104923 | 0.177508 | 0.05367  | 0.013053 | 0.002078 | 0.000248 |
| 328.8 | 0.063622 | 0.067317 | 0.078784 | 0.090991 | 0.096539 | 0.104429 | 0.175551 | 0.053181 | 0.013053 | 0.002078 | 0.000126 |
| 328.9 | 0.063375 | 0.06707  | 0.078413 | 0.090621 | 0.096045 | 0.104063 | 0.17348  | 0.052573 | 0.012931 | 0.001956 | 0.000248 |
| 329   | 0.063128 | 0.066581 | 0.078171 | 0.090374 | 0.095675 | 0.103693 | 0.171646 | 0.05196  | 0.013175 | 0.0022   | 0.00037  |
| 329.1 | 0.062881 | 0.066334 | 0.077924 | 0.090003 | 0.095309 | 0.103075 | 0.169699 | 0.051352 | 0.013297 | 0.002078 | 0.000369 |
| 329.2 | 0.062634 | 0.065963 | 0.077553 | 0.08939  | 0.094815 | 0.102705 | 0.167628 | 0.050621 | 0.012931 | 0.001956 | 0.000247 |
| 329.3 | 0.062387 | 0.065716 | 0.077306 | 0.088896 | 0.094444 | 0.102211 | 0.165671 | 0.050008 | 0.012931 | 0.001956 | 0.000247 |
| 329.4 | 0.062016 | 0.065469 | 0.076936 | 0.088402 | 0.093827 | 0.101593 | 0.163476 | 0.049524 | 0.012443 | 0.001834 | 0.000125 |
| 329.5 | 0.061893 | 0.065222 | 0.076689 | 0.088279 | 0.093333 | 0.101227 | 0.161519 | 0.049034 | 0.012199 | 0.001956 | 0.000125 |
| 329.6 | 0.061646 | 0.065099 | 0.076318 | 0.088032 | 0.093086 | 0.100857 | 0.159572 | 0.048545 | 0.012199 | 0.001955 | 0.000247 |
| 329.7 | 0.061522 | 0.064852 | 0.075948 | 0.087661 | 0.09272  | 0.100486 | 0.157624 | 0.047937 | 0.012077 | 0.001834 | 0.000369 |
| 329.8 | 0.061275 | 0.064358 | 0.075454 | 0.087167 | 0.09235  | 0.099869 | 0.155791 | 0.04745  | 0.012199 | 0.001955 | 0.000491 |
| 329.9 | 0.061028 | 0.064234 | 0.075212 | 0.086678 | 0.092103 | 0.099498 | 0.153596 | 0.046718 | 0.011955 | 0.001589 | 0.000247 |
| 330   | 0.060786 | 0.063987 | 0.074965 | 0.086431 | 0.091732 | 0.099128 | 0.151763 | 0.04623  | 0.012077 | 0.001589 | 0.000125 |
| 330.1 | 0.060662 | 0.063745 | 0.074718 | 0.086184 | 0.091362 | 0.098515 | 0.149929 | 0.045865 | 0.012077 | 0.001711 | 0.000125 |
| 330.2 | 0.060539 | 0.063622 | 0.074471 | 0.085814 | 0.091238 | 0.098145 | 0.147982 | 0.045255 | 0.011833 | 0.001589 | 3.01E-06 |

|       |          |          |          |          |          |          |          |          |          |          |          |
|-------|----------|----------|----------|----------|----------|----------|----------|----------|----------|----------|----------|
| 330.3 | 0.060539 | 0.063498 | 0.074347 | 0.085567 | 0.090744 | 0.097651 | 0.146148 | 0.044888 | 0.011955 | 0.001589 | 0.000125 |
| 330.4 | 0.060292 | 0.063251 | 0.073853 | 0.085196 | 0.090374 | 0.097157 | 0.144324 | 0.044523 | 0.011833 | 0.001711 | 0.000247 |
| 330.5 | 0.060168 | 0.063004 | 0.07373  | 0.084949 | 0.090127 | 0.097033 | 0.142367 | 0.043913 | 0.011589 | 0.001589 | 0.000247 |
| 330.6 | 0.059551 | 0.062634 | 0.073359 | 0.084455 | 0.08939  | 0.096416 | 0.14042  | 0.043425 | 0.011467 | 0.001589 | 0.000125 |
| 330.7 | 0.059551 | 0.06251  | 0.073112 | 0.084208 | 0.089267 | 0.096292 | 0.138586 | 0.042937 | 0.011467 | 0.001711 | 0.000125 |
| 330.8 | 0.059304 | 0.06214  | 0.072989 | 0.083842 | 0.088896 | 0.095922 | 0.136639 | 0.042449 | 0.011345 | 0.001711 | 0.000125 |
| 330.9 | 0.059304 | 0.061893 | 0.072742 | 0.083472 | 0.088526 | 0.095432 | 0.134805 | 0.041961 | 0.011345 | 0.001589 | 2.74E-06 |
| 331   | 0.059304 | 0.061769 | 0.072495 | 0.083348 | 0.088032 | 0.095309 | 0.133095 | 0.041351 | 0.011345 | 0.001467 | 0.000125 |
| 331.1 | 0.058933 | 0.061522 | 0.072252 | 0.082978 | 0.087538 | 0.094568 | 0.131385 | 0.040741 | 0.011101 | 0.001345 | 2.68E-06 |
| 331.2 | 0.058933 | 0.061522 | 0.072005 | 0.082854 | 0.087291 | 0.094444 | 0.129922 | 0.040498 | 0.011223 | 0.001467 | 0.000125 |
| 331.3 | 0.058563 | 0.061399 | 0.071758 | 0.082607 | 0.086802 | 0.094074 | 0.128336 | 0.039888 | 0.011101 | 0.001467 | 0.000125 |
| 331.4 | 0.058316 | 0.061275 | 0.071635 | 0.08236  | 0.086802 | 0.093703 | 0.126749 | 0.039399 | 0.010979 | 0.001589 | 0.000125 |
| 331.5 | 0.058192 | 0.060905 | 0.071264 | 0.081866 | 0.086431 | 0.093456 | 0.125286 | 0.039156 | 0.010979 | 0.001711 | 0.000247 |
| 331.6 | 0.05795  | 0.060662 | 0.071017 | 0.081619 | 0.086061 | 0.092839 | 0.1237   | 0.038668 | 0.010979 | 0.001589 | 0.000247 |
| 331.7 | 0.057827 | 0.060415 | 0.07077  | 0.081372 | 0.085814 | 0.09272  | 0.122113 | 0.03818  | 0.010857 | 0.001589 | 0.000124 |
| 331.8 | 0.057703 | 0.060292 | 0.070523 | 0.081007 | 0.085443 | 0.092226 | 0.120413 | 0.03757  | 0.010735 | 0.001467 | 2.45E-06 |
| 331.9 | 0.057456 | 0.060168 | 0.070523 | 0.080883 | 0.085073 | 0.091856 | 0.118826 | 0.037082 | 0.010613 | 0.001467 | -0.00024 |
| 332   | 0.057456 | 0.060045 | 0.070276 | 0.08076  | 0.084949 | 0.091732 | 0.117477 | 0.036838 | 0.010613 | 0.001711 | -0.00024 |
| 332.1 | 0.057333 | 0.060045 | 0.070276 | 0.080513 | 0.084702 | 0.091362 | 0.1159   | 0.03635  | 0.010613 | 0.001467 | -0.00024 |
| 332.2 | 0.056962 | 0.059674 | 0.069906 | 0.080142 | 0.084332 | 0.090991 | 0.114314 | 0.035984 | 0.010369 | 0.001344 | -0.00024 |
| 332.3 | 0.056839 | 0.059427 | 0.06954  | 0.079772 | 0.084089 | 0.090621 | 0.112841 | 0.035496 | 0.010369 | 0.001344 | 2.3E-06  |
| 332.4 | 0.056715 | 0.05918  | 0.069417 | 0.079401 | 0.083719 | 0.090127 | 0.111141 | 0.034886 | 0.010125 | 0.0011   | 2.26E-06 |
| 332.5 | 0.056592 | 0.059057 | 0.06917  | 0.079154 | 0.083472 | 0.090003 | 0.109792 | 0.034764 | 0.010125 | 0.001222 | 0.000246 |
| 332.6 | 0.056345 | 0.05881  | 0.068923 | 0.078907 | 0.083101 | 0.08939  | 0.108329 | 0.034154 | 0.010125 | 0.0011   | 0.000124 |
| 332.7 | 0.056221 | 0.058563 | 0.068552 | 0.078537 | 0.082854 | 0.08902  | 0.106989 | 0.033911 | 0.010004 | 0.0011   | -0.00012 |
| 332.8 | 0.055851 | 0.058192 | 0.068058 | 0.07829  | 0.082237 | 0.088526 | 0.105773 | 0.033545 | 0.010247 | 0.001222 | 0.000124 |
| 332.9 | 0.05548  | 0.057827 | 0.067811 | 0.0778   | 0.081743 | 0.087908 | 0.10431  | 0.033179 | 0.009882 | 0.000978 | -0.00012 |
| 333   | 0.05511  | 0.057333 | 0.067317 | 0.077183 | 0.08113  | 0.087538 | 0.103085 | 0.032935 | 0.010004 | 0.001222 | 2.1E-06  |
| 333.1 | 0.054744 | 0.057086 | 0.066947 | 0.076936 | 0.080636 | 0.086802 | 0.101745 | 0.032447 | 0.009882 | 0.001222 | 2.07E-06 |
| 333.2 | 0.054497 | 0.056962 | 0.066823 | 0.076565 | 0.080636 | 0.086678 | 0.10052  | 0.032081 | 0.00976  | 0.001222 | 2.05E-06 |
| 333.3 | 0.054497 | 0.056839 | 0.066581 | 0.076442 | 0.080513 | 0.086555 | 0.09918  | 0.031593 | 0.00976  | 0.001222 | 2.02E-06 |
| 333.4 | 0.054373 | 0.056839 | 0.066457 | 0.076318 | 0.080266 | 0.086184 | 0.097964 | 0.031227 | 0.00976  | 0.001466 | 0.000124 |
| 333.5 | 0.054003 | 0.056345 | 0.065963 | 0.075824 | 0.079772 | 0.085937 | 0.096739 | 0.030983 | 0.009882 | 0.001588 | 0.000368 |
| 333.6 | 0.053756 | 0.055974 | 0.065593 | 0.075577 | 0.079278 | 0.085443 | 0.095276 | 0.030495 | 0.009638 | 0.001466 | 0.000246 |
| 333.7 | 0.053262 | 0.055604 | 0.065099 | 0.075088 | 0.078784 | 0.084826 | 0.093817 | 0.030007 | 0.009394 | 0.001344 | 1.91E-06 |
| 333.8 | 0.053015 | 0.055357 | 0.064975 | 0.074965 | 0.078537 | 0.084579 | 0.092476 | 0.029763 | 0.009394 | 0.001222 | -0.00012 |
| 333.9 | 0.053015 | 0.055357 | 0.064975 | 0.074841 | 0.078294 | 0.084455 | 0.091134 | 0.029275 | 0.009149 | 0.0011   | -0.00024 |
| 334   | 0.052891 | 0.055233 | 0.064852 | 0.074718 | 0.078171 | 0.084208 | 0.090035 | 0.029032 | 0.009272 | 0.001222 | 1.83E-06 |
| 334.1 | 0.052891 | 0.05511  | 0.064728 | 0.074347 | 0.077924 | 0.083842 | 0.088816 | 0.028787 | 0.009149 | 0.001344 | 1.81E-06 |
| 334.2 | 0.052521 | 0.054744 | 0.064358 | 0.073853 | 0.07743  | 0.083348 | 0.087717 | 0.028422 | 0.009027 | 0.001344 | 0.000124 |
| 334.3 | 0.052397 | 0.05462  | 0.064234 | 0.07373  | 0.077306 | 0.083101 | 0.08662  | 0.028055 | 0.00915  | 0.001466 | 1.77E-06 |
| 334.4 | 0.052274 | 0.054497 | 0.063987 | 0.073606 | 0.076936 | 0.082731 | 0.085399 | 0.027568 | 0.008905 | 0.001222 | -0.00012 |
| 334.5 | 0.052274 | 0.05425  | 0.063745 | 0.073606 | 0.076689 | 0.082731 | 0.084302 | 0.027202 | 0.008784 | 0.000978 | -0.00036 |

|       |          |          |          |          |          |          |          |          |          |          |          |
|-------|----------|----------|----------|----------|----------|----------|----------|----------|----------|----------|----------|
| 334.6 | 0.052274 | 0.05425  | 0.063745 | 0.073483 | 0.076565 | 0.08236  | 0.083448 | 0.026958 | 0.009028 | 0.0011   | -0.00024 |
| 334.7 | 0.052397 | 0.054126 | 0.063622 | 0.073359 | 0.076442 | 0.082237 | 0.082471 | 0.026836 | 0.008905 | 0.0011   | -0.00024 |
| 334.8 | 0.052155 | 0.054003 | 0.063375 | 0.073112 | 0.076442 | 0.08199  | 0.081496 | 0.02647  | 0.008905 | 0.001222 | -0.00024 |
| 334.9 | 0.051908 | 0.053879 | 0.063375 | 0.072742 | 0.076071 | 0.081496 | 0.080398 | 0.026348 | 0.008784 | 0.0011   | -0.00012 |
| 335   | 0.051908 | 0.053756 | 0.063251 | 0.072618 | 0.075824 | 0.081619 | 0.079299 | 0.025982 | 0.00854  | 0.000856 | -0.00012 |
| 335.1 | 0.051661 | 0.053509 | 0.063004 | 0.072252 | 0.075454 | 0.081007 | 0.078202 | 0.025616 | 0.008418 | 0.000856 | -0.00024 |
| 335.2 | 0.051661 | 0.053509 | 0.063128 | 0.072005 | 0.075335 | 0.080883 | 0.077226 | 0.025372 | 0.008418 | 0.000856 | -0.00012 |
| 335.3 | 0.051538 | 0.053262 | 0.062881 | 0.071758 | 0.075088 | 0.08076  | 0.076127 | 0.025006 | 0.008418 | 0.000734 | -0.00024 |
| 335.4 | 0.051414 | 0.053138 | 0.062634 | 0.071635 | 0.074965 | 0.080389 | 0.075273 | 0.024762 | 0.008418 | 0.000978 | -0.00012 |
| 335.5 | 0.051291 | 0.053015 | 0.06251  | 0.071635 | 0.074841 | 0.080266 | 0.074419 | 0.024518 | 0.00854  | 0.000978 | 0.000124 |
| 335.6 | 0.051044 | 0.052891 | 0.062263 | 0.071388 | 0.074471 | 0.080019 | 0.073444 | 0.024274 | 0.00854  | 0.000856 | 1.5E-06  |
| 335.7 | 0.05092  | 0.053015 | 0.06214  | 0.071388 | 0.074347 | 0.079895 | 0.072468 | 0.02403  | 0.008296 | 0.000856 | 1.48E-06 |
| 335.8 | 0.05092  | 0.052891 | 0.06214  | 0.071141 | 0.074224 | 0.079895 | 0.071491 | 0.023664 | 0.008296 | 0.000734 | -0.00012 |
| 335.9 | 0.05055  | 0.052521 | 0.061893 | 0.070894 | 0.073853 | 0.079401 | 0.070637 | 0.023665 | 0.008296 | 0.000612 | -0.00012 |
| 336   | 0.050426 | 0.052274 | 0.061522 | 0.070647 | 0.073606 | 0.079154 | 0.069783 | 0.023298 | 0.008174 | 0.000612 | -0.00012 |
| 336.1 | 0.050303 | 0.051908 | 0.061275 | 0.070276 | 0.073359 | 0.078784 | 0.069173 | 0.023176 | 0.008174 | 0.000977 | -0.00012 |
| 336.2 | 0.049932 | 0.051661 | 0.060905 | 0.070153 | 0.072989 | 0.078171 | 0.068442 | 0.02281  | 0.008052 | 0.000977 | 1.39E-06 |
| 336.3 | 0.049809 | 0.051538 | 0.060662 | 0.069782 | 0.072618 | 0.078047 | 0.067709 | 0.022566 | 0.008052 | 0.001099 | 1.38E-06 |
| 336.4 | 0.049809 | 0.051538 | 0.060539 | 0.06954  | 0.072495 | 0.0778   | 0.066978 | 0.022323 | 0.008052 | 0.001099 | -0.00012 |
| 336.5 | 0.049685 | 0.051414 | 0.060415 | 0.069293 | 0.072376 | 0.077677 | 0.066124 | 0.022078 | 0.00793  | 0.000977 | -0.00012 |
| 336.6 | 0.049562 | 0.051414 | 0.060415 | 0.06917  | 0.072252 | 0.077677 | 0.06527  | 0.021834 | 0.007808 | 0.000855 | -0.00024 |
| 336.7 | 0.049315 | 0.051167 | 0.060168 | 0.06917  | 0.072129 | 0.077183 | 0.064416 | 0.021469 | 0.007686 | 0.000733 | -0.00049 |
| 336.8 | 0.049315 | 0.05092  | 0.060168 | 0.068923 | 0.071758 | 0.077183 | 0.063683 | 0.021224 | 0.007564 | 0.000733 | -0.00036 |
| 336.9 | 0.049315 | 0.050797 | 0.059921 | 0.068799 | 0.071635 | 0.076812 | 0.062952 | 0.020981 | 0.007564 | 0.000733 | -0.00036 |
| 337   | 0.048949 | 0.050426 | 0.059674 | 0.068552 | 0.071264 | 0.076565 | 0.062219 | 0.020859 | 0.007442 | 0.000611 | -0.00024 |
| 337.1 | 0.048825 | 0.050179 | 0.059427 | 0.068305 | 0.070894 | 0.076195 | 0.061488 | 0.020615 | 0.007564 | 0.000611 | -0.00024 |
| 337.2 | 0.048578 | 0.050179 | 0.05918  | 0.068058 | 0.07077  | 0.075824 | 0.060755 | 0.020615 | 0.007564 | 0.000733 | -0.00024 |
| 337.3 | 0.048208 | 0.049932 | 0.058933 | 0.067688 | 0.070276 | 0.075701 | 0.060024 | 0.020371 | 0.007442 | 0.000733 | -0.00024 |
| 337.4 | 0.048084 | 0.049685 | 0.058563 | 0.067441 | 0.070029 | 0.075212 | 0.059414 | 0.020371 | 0.007564 | 0.000733 | -0.00012 |
| 337.5 | 0.047961 | 0.049438 | 0.058439 | 0.06707  | 0.069906 | 0.075088 | 0.058803 | 0.020249 | 0.007564 | 0.000855 | -0.00012 |
| 337.6 | 0.047837 | 0.049315 | 0.058316 | 0.066823 | 0.069782 | 0.074841 | 0.058072 | 0.020005 | 0.007442 | 0.000855 | -0.00024 |
| 337.7 | 0.04759  | 0.049196 | 0.058069 | 0.0667   | 0.069417 | 0.074347 | 0.057339 | 0.019761 | 0.007198 | 0.000733 | -0.00024 |
| 337.8 | 0.04759  | 0.049196 | 0.058069 | 0.066581 | 0.069293 | 0.074471 | 0.056729 | 0.019639 | 0.007198 | 0.000977 | -0.00024 |
| 337.9 | 0.04759  | 0.049196 | 0.05795  | 0.066457 | 0.06917  | 0.074224 | 0.056119 | 0.019517 | 0.007198 | 0.000977 | -0.00012 |
| 338   | 0.04747  | 0.049315 | 0.057827 | 0.066581 | 0.068923 | 0.074224 | 0.055509 | 0.019273 | 0.007198 | 0.000977 | -0.00012 |
| 338.1 | 0.04747  | 0.048949 | 0.057703 | 0.066457 | 0.068923 | 0.0741   | 0.0549   | 0.019151 | 0.00732  | 0.000855 | -0.00012 |
| 338.2 | 0.04747  | 0.048825 | 0.05758  | 0.06621  | 0.068799 | 0.07373  | 0.054168 | 0.018785 | 0.007198 | 0.000733 | -0.00012 |
| 338.3 | 0.047223 | 0.048455 | 0.057333 | 0.065963 | 0.068429 | 0.07373  | 0.053557 | 0.018541 | 0.007198 | 0.000733 | 1.09E-06 |
| 338.4 | 0.0471   | 0.048084 | 0.057086 | 0.065593 | 0.068058 | 0.073236 | 0.052947 | 0.018541 | 0.00732  | 0.000855 | 1.08E-06 |
| 338.5 | 0.046976 | 0.047961 | 0.056962 | 0.065469 | 0.067811 | 0.072865 | 0.052216 | 0.018297 | 0.007198 | 0.000733 | -0.00024 |
| 338.6 | 0.046853 | 0.048084 | 0.056962 | 0.065346 | 0.067811 | 0.072865 | 0.051483 | 0.018053 | 0.006954 | 0.000733 | -0.00024 |
| 338.7 | 0.04673  | 0.048208 | 0.056962 | 0.065469 | 0.067688 | 0.072495 | 0.050752 | 0.017931 | 0.006954 | 0.000733 | -0.00049 |
| 338.8 | 0.046607 | 0.047961 | 0.056839 | 0.065346 | 0.067564 | 0.072376 | 0.050019 | 0.017687 | 0.006832 | 0.000489 | -0.00049 |



|       |          |          |          |          |          |          |          |          |          |          |          |
|-------|----------|----------|----------|----------|----------|----------|----------|----------|----------|----------|----------|
| 338.9 | 0.046607 | 0.047837 | 0.056592 | 0.064975 | 0.067441 | 0.072005 | 0.04941  | 0.017687 | 0.00671  | 0.000611 | -0.00049 |
| 339   | 0.046483 | 0.047714 | 0.056468 | 0.064852 | 0.067194 | 0.071758 | 0.0488   | 0.017566 | 0.00671  | 0.000489 | -0.00049 |
| 339.1 | 0.04636  | 0.04759  | 0.056345 | 0.064605 | 0.06707  | 0.071635 | 0.048434 | 0.017443 | 0.00671  | 0.000611 | -0.00024 |
| 339.2 | 0.046237 | 0.047714 | 0.056345 | 0.064605 | 0.06707  | 0.071511 | 0.047824 | 0.017199 | 0.006588 | 0.000489 | -0.00037 |
| 339.3 | 0.045866 | 0.04747  | 0.056098 | 0.064605 | 0.0667   | 0.071511 | 0.047336 | 0.016956 | 0.006588 | 0.000489 | -0.00024 |
| 339.4 | 0.045497 | 0.047223 | 0.055851 | 0.064358 | 0.066457 | 0.071141 | 0.04697  | 0.017078 | 0.006832 | 0.000611 | -0.00012 |
| 339.5 | 0.04525  | 0.04673  | 0.05548  | 0.063987 | 0.06621  | 0.07077  | 0.04636  | 0.016834 | 0.00671  | 0.000489 | -0.00037 |
| 339.6 | 0.045003 | 0.046607 | 0.055357 | 0.063864 | 0.066087 | 0.070647 | 0.045872 | 0.016711 | 0.006466 | 0.000489 | -0.00037 |
| 339.7 | 0.045003 | 0.046607 | 0.055357 | 0.063498 | 0.06584  | 0.070276 | 0.045383 | 0.016589 | 0.006466 | 0.000611 | -0.00037 |
| 339.8 | 0.045003 | 0.046483 | 0.05511  | 0.063375 | 0.065469 | 0.070153 | 0.044896 | 0.016346 | 0.006344 | 0.000611 | -0.00037 |
| 339.9 | 0.045003 | 0.046483 | 0.054991 | 0.063128 | 0.065222 | 0.069906 | 0.044408 | 0.016224 | 0.006344 | 0.000611 | -0.00024 |
| 340   | 0.045003 | 0.04636  | 0.054744 | 0.063004 | 0.065099 | 0.069782 | 0.043919 | 0.016102 | 0.006344 | 0.000611 | -0.00024 |
| 340.1 | 0.044757 | 0.046113 | 0.054373 | 0.062757 | 0.064975 | 0.069659 | 0.043431 | 0.015979 | 0.006344 | 0.000489 | -0.00024 |
| 340.2 | 0.044757 | 0.04599  | 0.054373 | 0.062757 | 0.065099 | 0.06954  | 0.042944 | 0.015858 | 0.0061   | 0.000489 | -0.00024 |
| 340.3 | 0.04451  | 0.045866 | 0.054126 | 0.062634 | 0.064728 | 0.069293 | 0.042577 | 0.015736 | 0.006344 | 0.000611 | -0.00012 |
| 340.4 | 0.044387 | 0.045866 | 0.054003 | 0.062387 | 0.064728 | 0.069046 | 0.041967 | 0.015492 | 0.006222 | 0.000489 | -0.00024 |
| 340.5 | 0.044264 | 0.045743 | 0.053879 | 0.062263 | 0.064481 | 0.068676 | 0.04148  | 0.01537  | 0.006222 | 0.000489 | -0.00037 |
| 340.6 | 0.044017 | 0.04562  | 0.053756 | 0.061893 | 0.064111 | 0.068676 | 0.041113 | 0.01537  | 0.006466 | 0.000611 | -0.00024 |
| 340.7 | 0.043894 | 0.04525  | 0.053509 | 0.061646 | 0.063987 | 0.068182 | 0.040626 | 0.015248 | 0.006222 | 0.000367 | -0.00024 |
| 340.8 | 0.043771 | 0.04525  | 0.053509 | 0.061646 | 0.063864 | 0.068305 | 0.040382 | 0.01537  | 0.006466 | 0.000489 | -0.00024 |
| 340.9 | 0.043524 | 0.04488  | 0.053262 | 0.061399 | 0.063498 | 0.067935 | 0.039893 | 0.015126 | 0.006222 | 0.000245 | -0.00037 |
| 341   | 0.043647 | 0.045003 | 0.053262 | 0.061522 | 0.063375 | 0.067811 | 0.039528 | 0.015004 | 0.0061   | 0.000245 | -0.00049 |
| 341.1 | 0.043524 | 0.04488  | 0.053138 | 0.061399 | 0.063128 | 0.067811 | 0.039283 | 0.015004 | 0.006222 | 0.000489 | -0.00024 |
| 341.2 | 0.043401 | 0.044634 | 0.053015 | 0.061152 | 0.062757 | 0.067441 | 0.038918 | 0.014882 | 0.0061   | 0.000489 | -0.00024 |
| 341.3 | 0.043401 | 0.044634 | 0.052891 | 0.061028 | 0.062881 | 0.067688 | 0.038674 | 0.014882 | 0.0061   | 0.000611 | -0.00012 |
| 341.4 | 0.043277 | 0.044387 | 0.052768 | 0.060905 | 0.062634 | 0.067441 | 0.038308 | 0.01476  | 0.005978 | 0.000489 | -0.00012 |
| 341.5 | 0.043277 | 0.04451  | 0.052768 | 0.060905 | 0.062634 | 0.067194 | 0.03782  | 0.014516 | 0.005856 | 0.000367 | -0.00037 |
| 341.6 | 0.043277 | 0.04451  | 0.052768 | 0.060905 | 0.062757 | 0.067194 | 0.037575 | 0.014394 | 0.005856 | 0.000489 | -0.00024 |
| 341.7 | 0.043031 | 0.044387 | 0.052768 | 0.060662 | 0.06251  | 0.066581 | 0.03721  | 0.014272 | 0.005734 | 0.000489 | -0.00037 |
| 341.8 | 0.042784 | 0.044264 | 0.052521 | 0.060292 | 0.062263 | 0.066457 | 0.036844 | 0.01415  | 0.005734 | 0.000489 | -0.00024 |
| 341.9 | 0.042908 | 0.044017 | 0.052521 | 0.060292 | 0.062263 | 0.066334 | 0.036477 | 0.014028 | 0.005734 | 0.000489 | -0.00012 |
| 342   | 0.042538 | 0.043771 | 0.052274 | 0.059921 | 0.061893 | 0.06584  | 0.03599  | 0.013906 | 0.005612 | 0.000367 | -0.00024 |
| 342.1 | 0.042538 | 0.043647 | 0.052155 | 0.059921 | 0.061893 | 0.065963 | 0.035624 | 0.013784 | 0.005612 | 0.000367 | -0.00012 |
| 342.2 | 0.042414 | 0.043524 | 0.051908 | 0.059798 | 0.061769 | 0.065593 | 0.035257 | 0.013662 | 0.005612 | 0.000489 | -0.00012 |
| 342.3 | 0.042168 | 0.043524 | 0.051661 | 0.059427 | 0.061646 | 0.065593 | 0.034892 | 0.01354  | 0.005612 | 0.000367 | -0.00024 |
| 342.4 | 0.042168 | 0.043401 | 0.051538 | 0.059304 | 0.061399 | 0.065469 | 0.034647 | 0.013662 | 0.005612 | 0.000367 | -0.00012 |
| 342.5 | 0.042168 | 0.043401 | 0.051538 | 0.05918  | 0.061399 | 0.065346 | 0.034403 | 0.013662 | 0.00549  | 0.000245 | 7E-07    |
| 342.6 | 0.042045 | 0.043277 | 0.051414 | 0.058933 | 0.061152 | 0.065346 | 0.034159 | 0.01354  | 0.005612 | 0.000245 | 6.96E-07 |
| 342.7 | 0.041921 | 0.043031 | 0.051167 | 0.05881  | 0.060786 | 0.064975 | 0.033916 | 0.01354  | 0.005612 | 0.000245 | 0.000123 |
| 342.8 | 0.041551 | 0.042908 | 0.051044 | 0.058563 | 0.060786 | 0.064728 | 0.033672 | 0.013418 | 0.005856 | 0.000367 | 6.85E-07 |
| 342.9 | 0.041305 | 0.042661 | 0.05092  | 0.058563 | 0.060662 | 0.064481 | 0.033306 | 0.013418 | 0.005856 | 0.000367 | -0.00012 |
| 343   | 0.041058 | 0.042414 | 0.050673 | 0.058316 | 0.060539 | 0.064234 | 0.032939 | 0.013296 | 0.005734 | 0.000489 | -0.00012 |

|       |          |          |          |          |          |          |          |          |          |          |          |
|-------|----------|----------|----------|----------|----------|----------|----------|----------|----------|----------|----------|
| 343.1 | 0.040935 | 0.042168 | 0.05055  | 0.058316 | 0.060292 | 0.064111 | 0.032574 | 0.013052 | 0.005612 | 0.000367 | -0.00037 |
| 343.2 | 0.040812 | 0.042168 | 0.05055  | 0.058192 | 0.059921 | 0.063864 | 0.032329 | 0.013052 | 0.005612 | 0.000489 | -0.00012 |
| 343.3 | 0.040812 | 0.042168 | 0.050303 | 0.05795  | 0.059798 | 0.063745 | 0.031964 | 0.012808 | 0.00549  | 0.000367 | -0.00024 |
| 343.4 | 0.040688 | 0.042045 | 0.050056 | 0.057827 | 0.059551 | 0.063622 | 0.031841 | 0.01293  | 0.00549  | 0.000489 | -0.00012 |
| 343.5 | 0.040688 | 0.042168 | 0.049932 | 0.057703 | 0.059551 | 0.063375 | 0.031475 | 0.012808 | 0.00549  | 0.000367 | -0.00012 |
| 343.6 | 0.040442 | 0.041921 | 0.049809 | 0.05758  | 0.059427 | 0.063498 | 0.03111  | 0.012686 | 0.005368 | 0.000245 | -0.00037 |
| 343.7 | 0.040195 | 0.041675 | 0.049685 | 0.057333 | 0.059057 | 0.063251 | 0.030744 | 0.012686 | 0.005368 | 0.000123 | -0.00024 |
| 343.8 | 0.040071 | 0.041675 | 0.049685 | 0.057333 | 0.05918  | 0.063251 | 0.0305   | 0.012564 | 0.005368 | 0.000123 | -0.00024 |
| 343.9 | 0.040071 | 0.041551 | 0.049685 | 0.057333 | 0.059057 | 0.063128 | 0.030134 | 0.01232  | 0.005246 | 6.68E-07 | -0.00024 |
| 344   | 0.040195 | 0.041551 | 0.049685 | 0.057333 | 0.059057 | 0.062881 | 0.030011 | 0.012442 | 0.005368 | 0.000123 | -0.00012 |
| 344.1 | 0.040318 | 0.041551 | 0.049562 | 0.057209 | 0.05918  | 0.062881 | 0.029767 | 0.01232  | 0.005246 | 0.000245 | -0.00024 |
| 344.2 | 0.040195 | 0.041428 | 0.049438 | 0.056962 | 0.058933 | 0.06251  | 0.029402 | 0.012076 | 0.005124 | 0.000123 | -0.00037 |
| 344.3 | 0.040195 | 0.041428 | 0.049438 | 0.056839 | 0.058933 | 0.062634 | 0.02928  | 0.012198 | 0.005124 | 0.000245 | -0.00024 |
| 344.4 | 0.040071 | 0.041305 | 0.049315 | 0.056715 | 0.058933 | 0.062387 | 0.028913 | 0.012076 | 0.005002 | 0.000245 | -0.00024 |
| 344.5 | 0.040071 | 0.041428 | 0.049315 | 0.056839 | 0.05881  | 0.062387 | 0.028669 | 0.012076 | 0.005002 | 0.000123 | -0.00037 |
| 344.6 | 0.040071 | 0.041428 | 0.049196 | 0.056839 | 0.058563 | 0.062263 | 0.028182 | 0.011832 | 0.004758 | 6.24E-07 | -0.00061 |
| 344.7 | 0.039948 | 0.041305 | 0.049072 | 0.056592 | 0.058439 | 0.06214  | 0.027938 | 0.01171  | 0.004758 | 6.2E-07  | -0.00049 |
| 344.8 | 0.039825 | 0.041058 | 0.048949 | 0.056468 | 0.058316 | 0.061893 | 0.027693 | 0.011589 | 0.00488  | 6.14E-07 | -0.00049 |
| 344.9 | 0.039825 | 0.040812 | 0.048949 | 0.056468 | 0.058316 | 0.06214  | 0.027449 | 0.011467 | 0.00488  | 0.000245 | -0.00037 |
| 345   | 0.039825 | 0.040812 | 0.049072 | 0.056345 | 0.058192 | 0.062016 | 0.027205 | 0.011344 | 0.004758 | 0.000245 | -0.00037 |
| 345.1 | 0.039702 | 0.040812 | 0.048949 | 0.056468 | 0.058069 | 0.062016 | 0.027084 | 0.011467 | 0.00488  | 0.000245 | -0.00024 |
| 345.2 | 0.039578 | 0.040688 | 0.048702 | 0.056221 | 0.05795  | 0.061646 | 0.026718 | 0.011222 | 0.004758 | 0.000245 | -0.00037 |
| 345.3 | 0.039455 | 0.040565 | 0.048578 | 0.056098 | 0.057827 | 0.061399 | 0.026474 | 0.011222 | 0.004758 | 0.000123 | -0.00037 |
| 345.4 | 0.039332 | 0.040688 | 0.048331 | 0.056221 | 0.05795  | 0.061522 | 0.026474 | 0.011344 | 0.005124 | 0.000245 | -0.00012 |
| 345.5 | 0.039332 | 0.040565 | 0.048331 | 0.055974 | 0.05795  | 0.061275 | 0.02623  | 0.011222 | 0.005124 | 0.000245 | -0.00024 |
| 345.6 | 0.039208 | 0.040565 | 0.048208 | 0.055851 | 0.057703 | 0.061275 | 0.026108 | 0.011222 | 0.005246 | 0.000245 | -0.00012 |
| 345.7 | 0.039208 | 0.040688 | 0.048208 | 0.055851 | 0.057703 | 0.061152 | 0.025985 | 0.011222 | 0.005124 | 0.000367 | 5.29E-07 |
| 345.8 | 0.039332 | 0.040565 | 0.048455 | 0.055604 | 0.057703 | 0.061152 | 0.02562  | 0.010857 | 0.00488  | 0.000245 | -0.00012 |
| 345.9 | 0.039332 | 0.040565 | 0.048331 | 0.055604 | 0.057703 | 0.061275 | 0.025375 | 0.010735 | 0.004636 | 0.000245 | -0.00024 |
| 346   | 0.039208 | 0.040442 | 0.048331 | 0.055604 | 0.057703 | 0.061028 | 0.025131 | 0.010612 | 0.004514 | 0.000123 | -0.00024 |
| 346.1 | 0.039208 | 0.040565 | 0.048331 | 0.05548  | 0.05758  | 0.061152 | 0.024887 | 0.01049  | 0.004514 | 0.000123 | -0.00024 |
| 346.2 | 0.039208 | 0.040565 | 0.048208 | 0.05548  | 0.057333 | 0.060905 | 0.024766 | 0.010612 | 0.004636 | 0.000245 | -0.00012 |
| 346.3 | 0.039085 | 0.040442 | 0.048084 | 0.05548  | 0.057209 | 0.060662 | 0.0244   | 0.010369 | 0.004514 | 0.000123 | -0.00037 |
| 346.4 | 0.039085 | 0.040318 | 0.047961 | 0.05548  | 0.056839 | 0.060786 | 0.024156 | 0.010369 | 0.004392 | 5.36E-07 | -0.00037 |
| 346.5 | 0.038839 | 0.040071 | 0.047714 | 0.055357 | 0.056839 | 0.060415 | 0.024033 | 0.010369 | 0.004514 | 0.000123 | -0.00037 |
| 346.6 | 0.038839 | 0.040071 | 0.047714 | 0.055357 | 0.056715 | 0.060662 | 0.023912 | 0.010369 | 0.004392 | 0.000245 | -0.00024 |
| 346.7 | 0.038839 | 0.040195 | 0.047714 | 0.055233 | 0.056715 | 0.060415 | 0.023667 | 0.010125 | 0.004392 | 0.000123 | -0.00024 |
| 346.8 | 0.038715 | 0.039948 | 0.04759  | 0.054991 | 0.056715 | 0.060045 | 0.023423 | 0.010125 | 0.00427  | 5.19E-07 | -0.00037 |
| 346.9 | 0.038839 | 0.039825 | 0.04747  | 0.054867 | 0.056715 | 0.060168 | 0.023302 | 0.010125 | 0.00427  | 5.16E-07 | -0.00024 |
| 347   | 0.038592 | 0.039702 | 0.047346 | 0.054744 | 0.056592 | 0.059798 | 0.023057 | 0.010003 | 0.00427  | -0.00024 | -0.00024 |
| 347.1 | 0.038592 | 0.039702 | 0.04747  | 0.054744 | 0.056592 | 0.059921 | 0.023057 | 0.010125 | 0.004392 | 5.1E-07  | 4.69E-07 |
| 347.2 | 0.038592 | 0.039825 | 0.047346 | 0.05462  | 0.056468 | 0.060045 | 0.022813 | 0.00988  | 0.00427  | 5.06E-07 | -0.00024 |
| 347.3 | 0.038345 | 0.039578 | 0.047346 | 0.054744 | 0.056468 | 0.059921 | 0.022569 | 0.009759 | 0.004148 | 0.000122 | -0.00024 |

|       |          |          |          |          |          |          |          |          |          |          |          |
|-------|----------|----------|----------|----------|----------|----------|----------|----------|----------|----------|----------|
| 347.4 | 0.038222 | 0.039455 | 0.047223 | 0.05462  | 0.056221 | 0.059921 | 0.022448 | 0.009637 | 0.004148 | 0.000122 | -0.00024 |
| 347.5 | 0.038099 | 0.039455 | 0.0471   | 0.054373 | 0.056098 | 0.059674 | 0.022203 | 0.009637 | 0.004148 | 0.000122 | -0.00037 |
| 347.6 | 0.037976 | 0.039208 | 0.046976 | 0.054373 | 0.055974 | 0.059551 | 0.022082 | 0.009637 | 0.00427  | 0.000122 | -0.00037 |
| 347.7 | 0.037852 | 0.039208 | 0.046853 | 0.054003 | 0.055851 | 0.059304 | 0.021838 | 0.009515 | 0.004026 | 0.000122 | -0.00037 |
| 347.8 | 0.037729 | 0.039085 | 0.04673  | 0.053879 | 0.055727 | 0.058933 | 0.021715 | 0.009515 | 0.00427  | 0.000122 | -0.00037 |
| 347.9 | 0.037482 | 0.038839 | 0.046607 | 0.053756 | 0.055604 | 0.058933 | 0.021472 | 0.009271 | 0.00427  | 4.77E-07 | -0.00037 |
| 348   | 0.037482 | 0.038715 | 0.046607 | 0.053632 | 0.05548  | 0.058686 | 0.021228 | 0.009149 | 0.004026 | -0.00012 | -0.00037 |
| 348.1 | 0.037359 | 0.038592 | 0.04636  | 0.053632 | 0.055357 | 0.058686 | 0.021105 | 0.009149 | 0.004148 | -0.00012 | -0.00037 |
| 348.2 | 0.037359 | 0.038345 | 0.046113 | 0.053509 | 0.05511  | 0.058563 | 0.020984 | 0.009149 | 0.004148 | 4.65E-07 | -0.00024 |
| 348.3 | 0.037359 | 0.038345 | 0.046113 | 0.053385 | 0.054991 | 0.058439 | 0.020862 | 0.009149 | 0.004026 | 4.62E-07 | -0.00024 |
| 348.4 | 0.037113 | 0.038345 | 0.04599  | 0.053262 | 0.054991 | 0.058563 | 0.020739 | 0.009149 | 0.004148 | 4.6E-07  | -0.00024 |
| 348.5 | 0.037359 | 0.038469 | 0.046113 | 0.053262 | 0.054991 | 0.058439 | 0.020495 | 0.008905 | 0.004026 | -0.00012 | -0.00024 |
| 348.6 | 0.037113 | 0.038222 | 0.04599  | 0.053015 | 0.054744 | 0.058316 | 0.020251 | 0.008905 | 0.003904 | -0.00012 | -0.00037 |
| 348.7 | 0.036989 | 0.038222 | 0.045866 | 0.053015 | 0.054744 | 0.058069 | 0.02013  | 0.008783 | 0.003904 | -0.00012 | -0.00024 |
| 348.8 | 0.036866 | 0.038222 | 0.045743 | 0.052891 | 0.05462  | 0.057827 | 0.020008 | 0.008783 | 0.004026 | 4.43E-07 | -0.00024 |
| 348.9 | 0.036619 | 0.037976 | 0.045497 | 0.052768 | 0.054497 | 0.057827 | 0.019885 | 0.008783 | 0.004026 | 4.41E-07 | -0.00037 |
| 349   | 0.036373 | 0.037852 | 0.045373 | 0.052521 | 0.054373 | 0.057456 | 0.019641 | 0.008661 | 0.004026 | 4.36E-07 | -0.00049 |
| 349.1 | 0.036496 | 0.037852 | 0.045373 | 0.052521 | 0.05425  | 0.05758  | 0.019397 | 0.008539 | 0.003782 | 4.3E-07  | -0.00049 |
| 349.2 | 0.036619 | 0.037976 | 0.04562  | 0.052644 | 0.05425  | 0.057827 | 0.019276 | 0.008539 | 0.003782 | -0.00012 | -0.00037 |
| 349.3 | 0.036373 | 0.037852 | 0.045373 | 0.052274 | 0.054126 | 0.05758  | 0.019154 | 0.008539 | 0.003782 | 0.000122 | -0.00024 |
| 349.4 | 0.03625  | 0.037729 | 0.04525  | 0.052155 | 0.054003 | 0.05758  | 0.019031 | 0.008539 | 0.003904 | 0.000122 | -0.00012 |
| 349.5 | 0.036126 | 0.037729 | 0.045127 | 0.052032 | 0.054003 | 0.057333 | 0.019031 | 0.008539 | 0.004026 | 0.000244 | 3.87E-07 |
| 349.6 | 0.036003 | 0.037482 | 0.045003 | 0.051908 | 0.053879 | 0.057209 | 0.018666 | 0.008173 | 0.003904 | 0.000122 | -0.00024 |
| 349.7 | 0.036003 | 0.037482 | 0.044757 | 0.051908 | 0.053632 | 0.057209 | 0.018544 | 0.008051 | 0.003782 | 0.000122 | -0.00037 |
| 349.8 | 0.036003 | 0.037359 | 0.044634 | 0.051785 | 0.053509 | 0.056839 | 0.0183   | 0.007929 | 0.00366  | 4.06E-07 | -0.00049 |
| 349.9 | 0.036126 | 0.037482 | 0.044757 | 0.052032 | 0.053509 | 0.057086 | 0.018056 | 0.007807 | 0.003538 | -0.00012 | -0.00061 |
| 350   | 0.03588  | 0.037359 | 0.044634 | 0.051908 | 0.053509 | 0.056839 | 0.018056 | 0.007807 | 0.00366  | 4E-07    | -0.00049 |

**Figure 1-S.** Extinction-coefficient spectra of *p*-phenol-ethylguanidine free base in DMSO as a function of total concentration, based on the data in Table 4-S. The format of this figure is different from Figure 3A of the main text, simply due to the choice to plot extinction coefficient ( $\epsilon=A/lC$ , computed using total concentration of  $C=0.005\text{ M}$  and  $l=0.95\text{ cm}$ ), rather than  $A$ . This scaling permits a closer examination of the spectral shapes at the lowest concentrations. For a dimerization equilibrium, the relative (not absolute) concentration of the dimer form is expected to depend *linearly* (not quadratically) on  $C$ , in the limit of low concentration. Indeed, a roughly-linear dependence of  $\epsilon_{318}$  on  $C$  is observed (inset), consistent with a dimerization equilibrium. That is, as  $C$  increases from 0, the fraction of the *p*-phenol-ethylguanidine that is present as H-bonded dimer initially rises linearly.

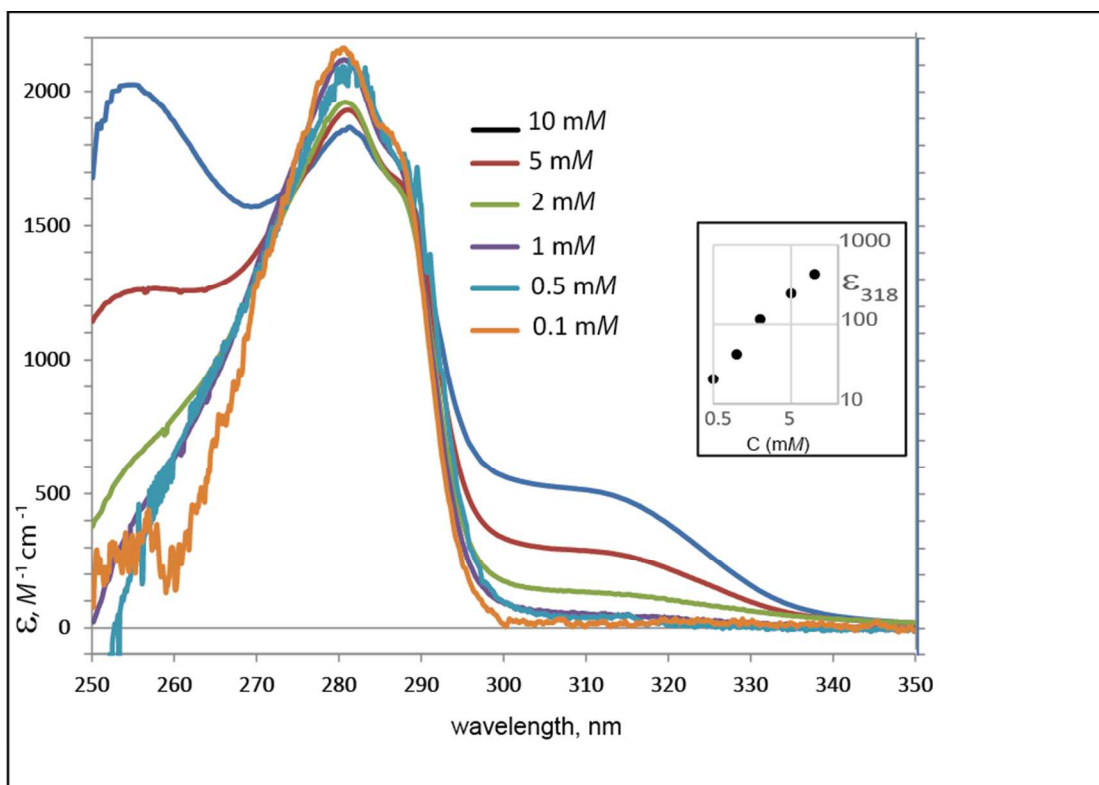

**Figure 2-S.** Extinction-coefficient spectra of *p*-phenol-ethylguanidine free base as a function of temperature, for a constant concentration of 5 mM; plotted directly from the data in Table 4-S. The format of this figure is different from Figure 3B of the main text, simply due to the choice to plot extinction coefficient (computed using total concentration of 0.005 M and pathlength of 0.95 cm) rather than the directly-measured value of absorbance. The inset shows the van 'Hoff plot of the equilibrium constant, based on best-fitted values for the monomer-dimer difference spectrum, obtained as shown in figure 4-S below.

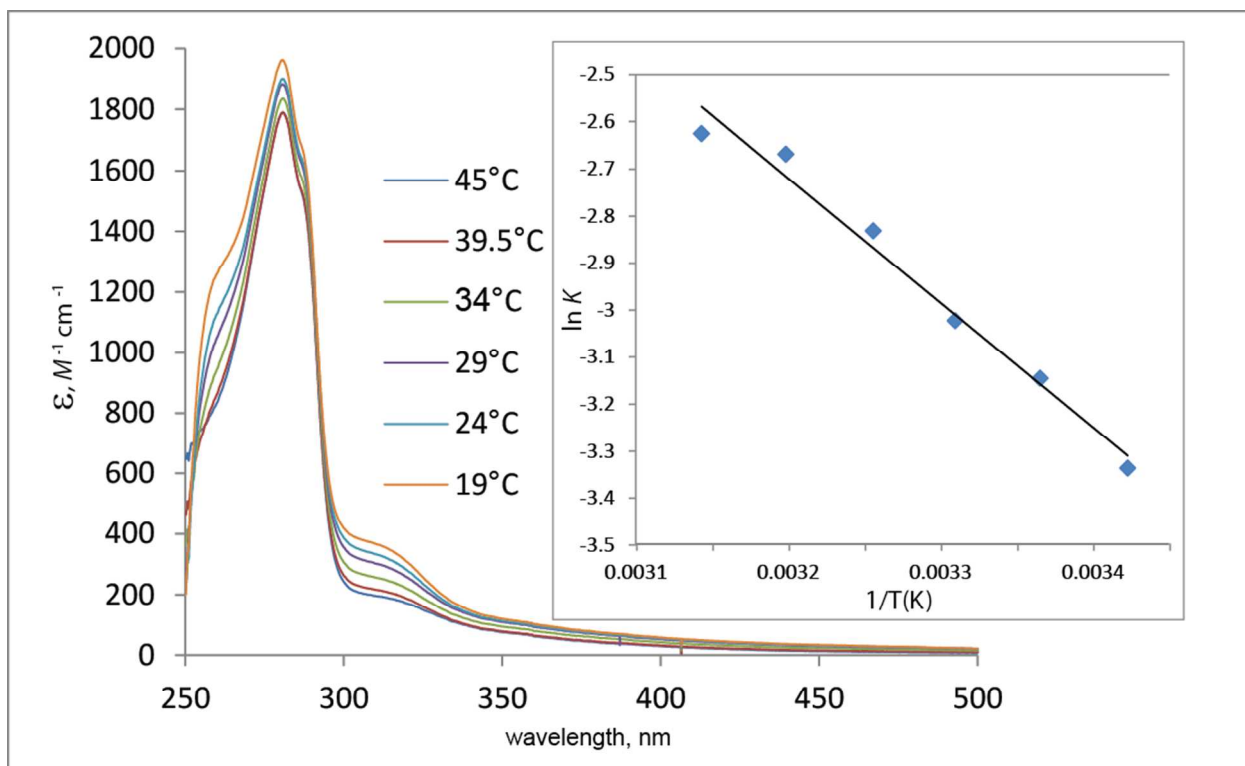

**Figure 3-S.** Fitting of difference spectra between the H-bonded and non-H-bonded forms of *p*-phenol-ethylguanidine free base (PEGFB) in DMSO. **Top**, measured difference spectra at the total PEGFB concentrations ( $C_{\text{total}}$ ) and temperatures according to the color-coded legend. Each of these difference spectra was obtained by correcting the corresponding column of raw measured absorbance values in Table 4-S to a pathlength of 1 cm, then subtracting the spectrum of PEGFB at 0.5 mM and 20.5°C, also corrected to a pathlength of 1 cm, but then further multiplied by a constant to correct it to the  $C_{\text{total}}$  value of the minuend spectrum. Thus each of these traces should correspond to the same difference spectrum of extinction-coefficient values, multiplied by varying values of  $C_{\text{H-bonded}}$ , each corresponding to the concentration of the H-bonded form in that particular sample. **Bottom**, fitting of the data from the top panel by using the SVD function in MATLAB. That is, the 10 spectra in the bottom panel represent the first (largest) component of the singular value decomposition (SVD) of the data matrix  $\mathbf{M}$  plotted as 10 spectra in the upper panel. Each spectrum in the upper panel thus corresponds to a column of  $\mathbf{M}$ . The spectral shape, common to all the plots of the bottom panel, is given by the column vector  $\mathbf{U}(1)$ , in the SVD represented by the matrix equation  $\mathbf{M} \approx \mathbf{U}(1) \mathbf{S}(1) \mathbf{V}^t(1)$ ; while the 10 concentrations  $C_{\text{H-bonded}}$  (given in the bottom panel) are also proportional to the 10 elements of the column vector  $\mathbf{V}(1)$ . There are two proportionality constants not determined directly from the SVD: one relating  $\mathbf{U}(1)$  to the extinction coefficient difference spectrum (of H-bonded minus non-H-bonded PEGFB); and the other relating the elements of  $\mathbf{V}(1)$  to the 10 values of  $C_{\text{H-bonded}}$ , given in the legend at bottom. These proportionality constants were chosen according to the following simultaneous constraints: (1) their product must equal the value of  $\mathbf{S}(1)$  from the SVD; (2) the values of the 5  $C_{\text{H-bonded}}$  values at 20.5° must give a consistent value for the equilibrium constant  $K_{\text{eq}} = (C_{\text{total}} - C_{\text{H-bonded}})^2 / (C_{\text{H-bonded}} / 2)$  at that temperature, and thus for  $\Delta G$ . Specifically, the variance of the 5 different values of  $\ln K_{\text{eq}}$  was minimized.

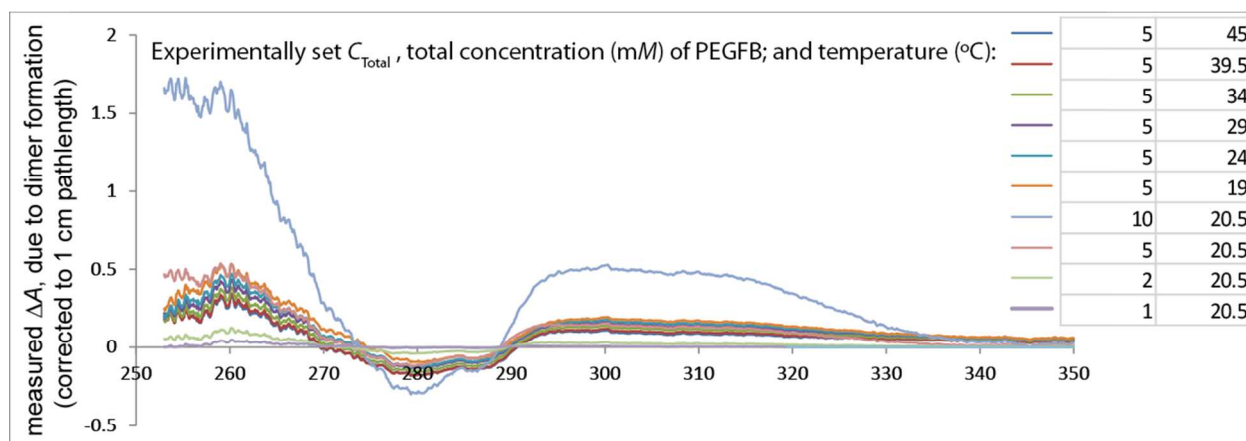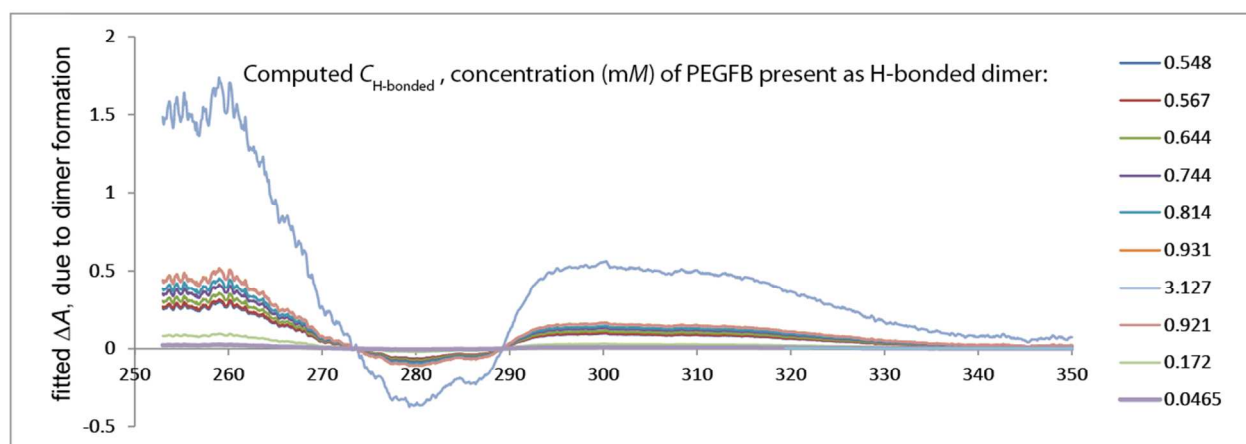

**Figure 4-S.** Computed extinction-coefficient spectrum of the H-bonded form of *p*-phenol-ethylguanidine free base (PEGFB) in DMSO, based on the data in Table 3-S. The fitted extinction-coefficient difference spectrum (computed easily by taking any of the spectra in the bottom panel of Fig. 3-S, and dividing by the corresponding value of  $C_{\text{H-bonded}}$ ) was added to the spectrum of the non-H-bonded (monomer) form, taken as the spectrum measured at 0.1 mM in Fig. 1-S. Throughout these computations, the value of  $C_{\text{H-bonded}}$  is understood to be twice the molarity of the PEGFB dimer.

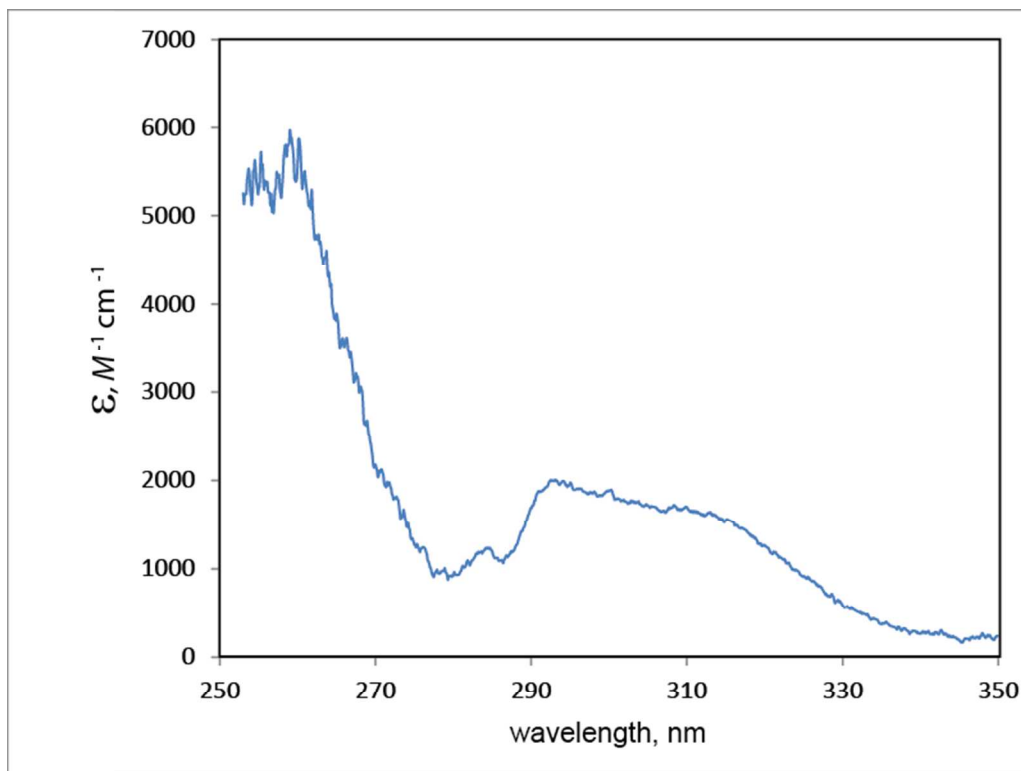

**Figure 5-S.** More complete spectral regions from 4000-1000  $\text{cm}^{-1}$  of spectra presented in the main paper. **A**, (*p*-phenolyl)ethylguanidinium bromide in methanol (as in Fig. 6D, 8C); **B**, (*p*-phenolyl)ethylguanidine free base in methanol (as in Fig. 6B, 8D); **C**, (*p*-phenolyl)ethylguanidine free base in DMSO (as in Fig. 6A, 8E); **D**, potassium *p*-cresolate in DMSO (as in fig. 8G); **E**, dodecylguanidine free base in DMSO; **F**, dodecylguanidinium bromide in DMSO. Regions are blanked due to strong sol-vent absorbances, and/or due to imperfect correction for background  $\text{CO}_2$  absorbance near 2300  $\text{cm}^{-1}$

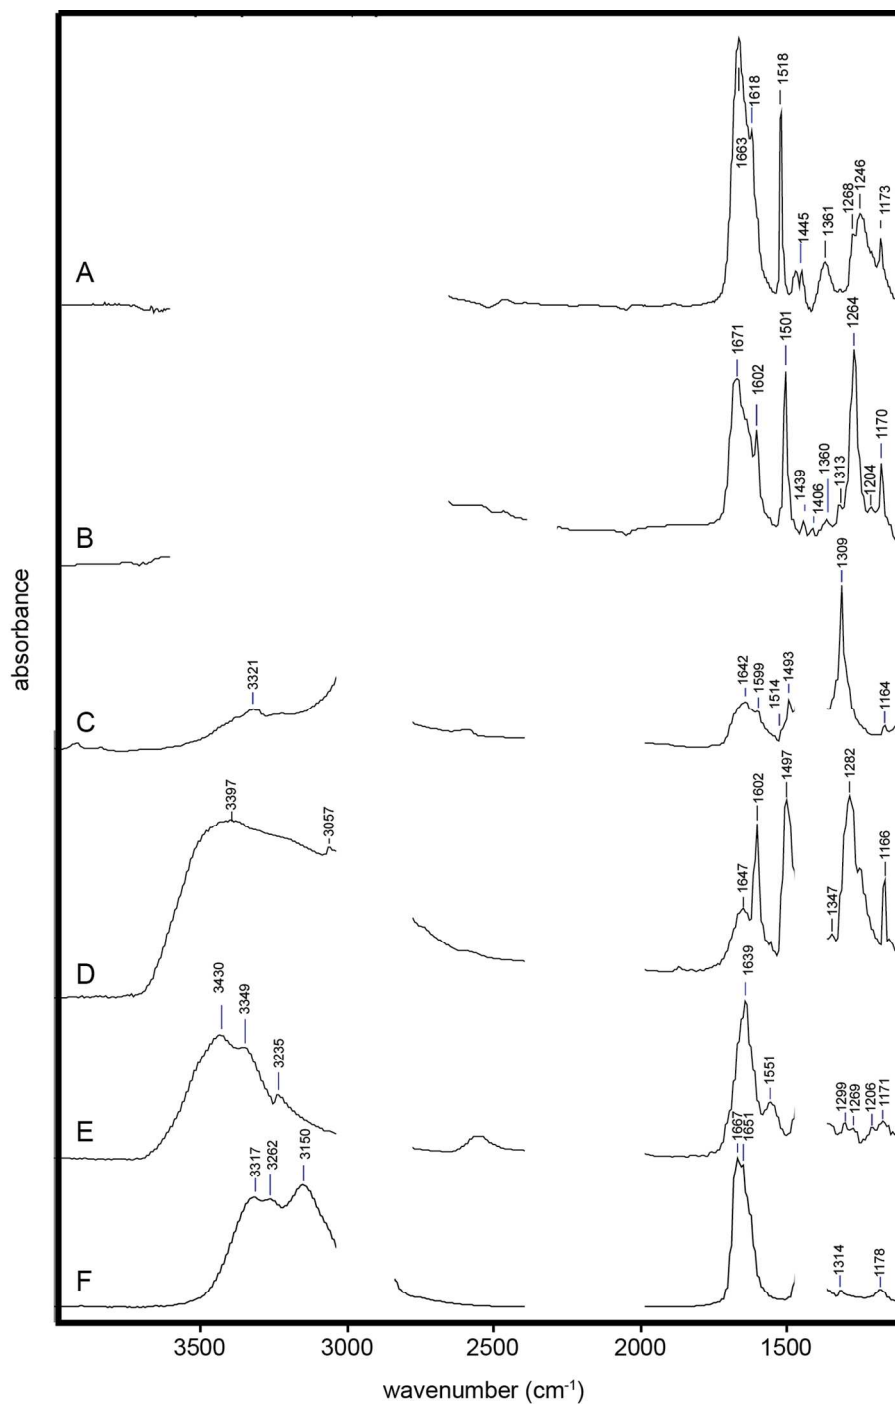



**Figure 6-S.** Spectra of additional crystalline samples in KBr pellets. IR spectra of these compounds were presented only in solution in the main paper. All spectra here were measured vs. air background. The only corrections applied were addition/subtraction of imperfectly matched water vapor absorbance; blanking of CO<sub>2</sub> absorbance signal near 2300 cm<sup>-1</sup>; and baseline leveling (i.e. a linear baseline was subtracted). **A**, potassium *p*-cresolate; **B**, dodecylguanidinium *p*-cresolate (made from 1:1 *p*-cresol and dodecylguanidine free base); **C**, dodecylguanidine (free base); **D**, dodecylguanidinium bromide; **E**, (*p*-anisoyl) dodecylguanidine (free base); **F**, (*p*-anisoyl) dodecylguanidinium bromide; **G**, (*p*-phenoyl) ethylguanidine (free base); **H**, (*p*-anisoyl) ethylguanidinium bromide.

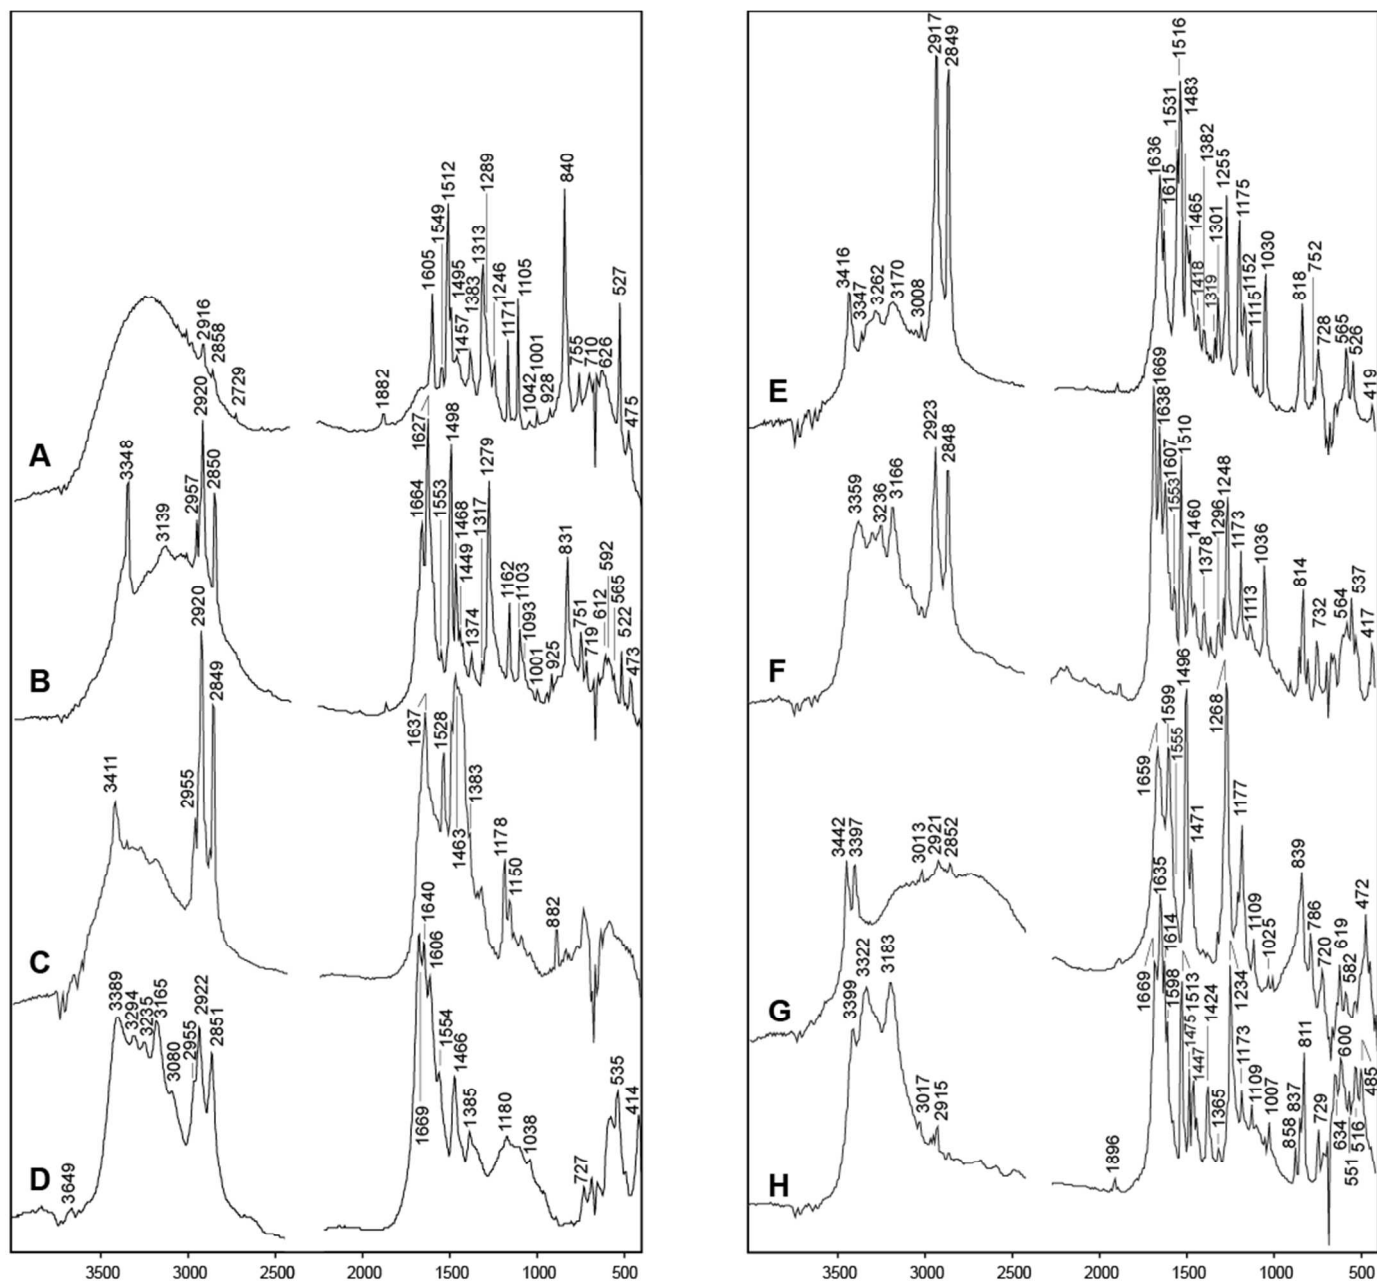



**Figure 7-S.**  $^1\text{H}$  NMR spectra of (*p*-phenyl)-ethylguanidine free base in  $\text{DMSO-}d_6$  as a function of concentration, as plotted in fig. 10 of the main paper. The original sample (bottom spectrum) was made at a concentration of 140 mM. It was then diluted successively to 70, 35, 17.5, 8.75, and 5 mM as labeled.

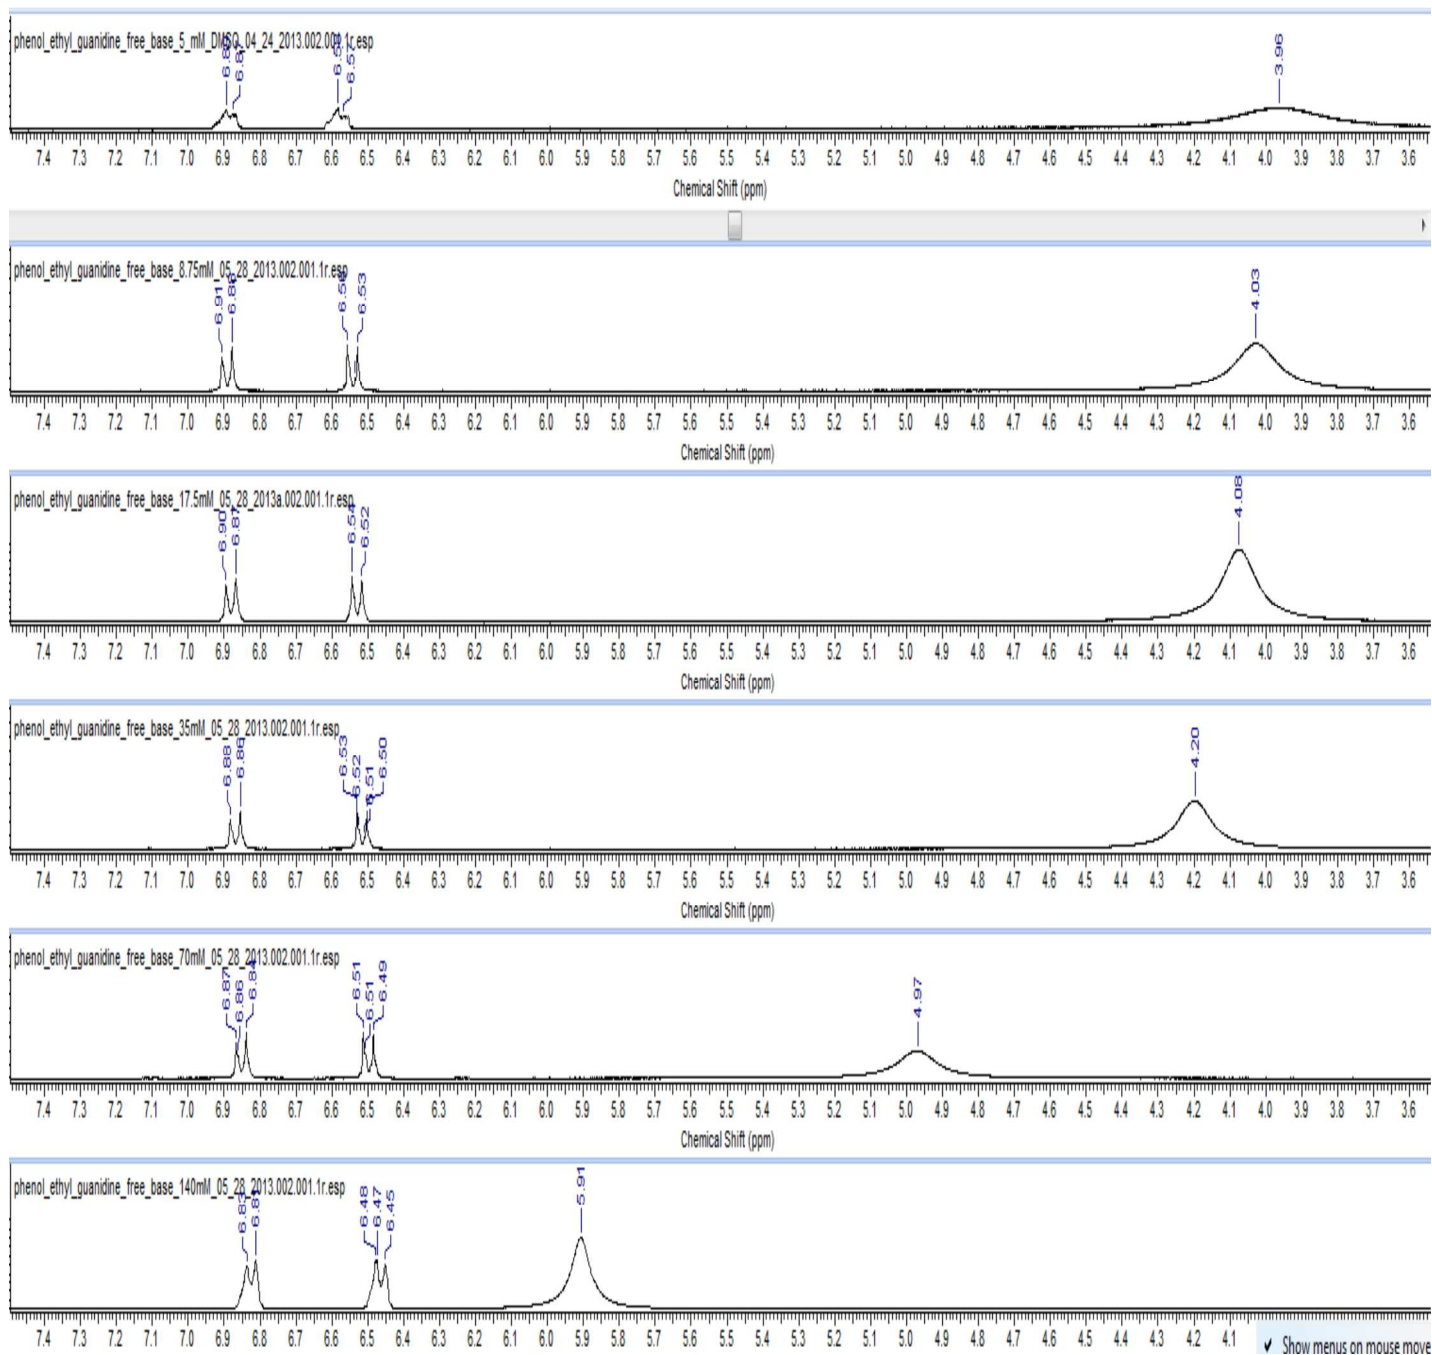

**Figure 8-S.** Additional spectra used in fig. 10 of the main paper.  $^1\text{H}$  NMR spectra of (*p*-phenyl)dodecylguanidine free base, 100 mM in  $\text{DMSO-}d_6$  (**A**). Comparison samples also measured at concentrations of 10-100 mM in  $\text{DMSO-}d_6$ , are potassium *p*-cresolate (**B**), *p*-cresol (**C**), dodecyl-guanidine free base (**D**), and (*p*-phenyl)dodecylguanidinium bromide (**E**). The absence of a distinct phenolic-OH resonance in **A**, and appearance of only a single band due to the 4 guanidino protons, shows that exchange among these 5 protons occurs much faster than the  $^1\text{H}$  NMR time scale. The control spectra of the protonated *p*-phenol derivatives in **C** and **E** shows that this phenolic proton is clearly detectable when it is not involved in the strong H-bond with the guanidine (free base) group. The chemical shift and bandshape of the phenolic proton (9.07 ppm) is completely unperturbed by the presence of *protonated* guanidinium groups. That is, the  $^1\text{H}$  NMR spectrum of (*p*-phenyl)dodecylguanidinium bromide (**E**) is nearly equal to a simple addition of  $^1\text{H}$  NMR of *p*-cresol (fig. 10C) and dodecyl guanidinium bromide (**D**), exactly as was seen for the corresponding IR spectra in fig. 7 of the main paper.

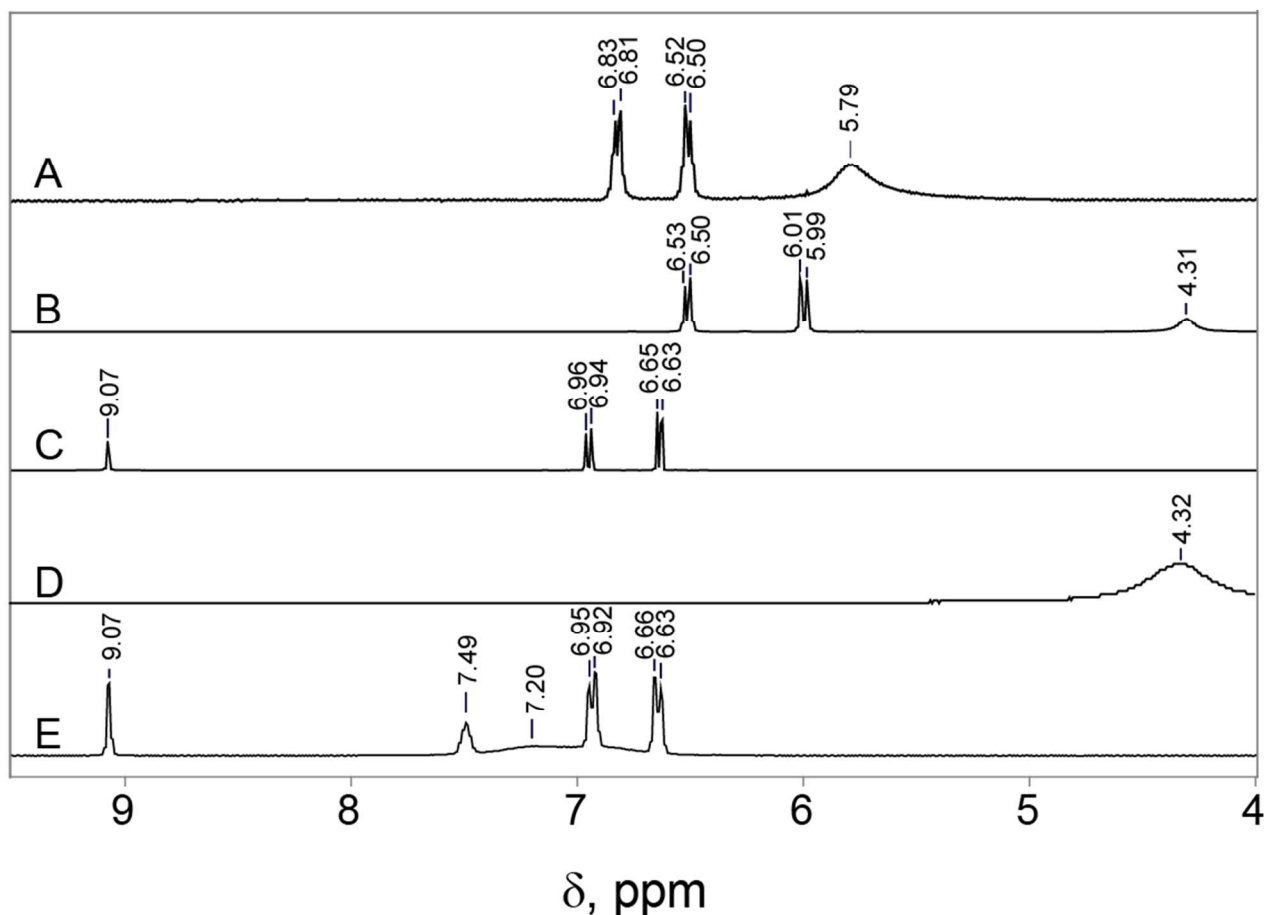

**Figure 9-S.**  $^1\text{H}$  NMR spectra showing interactions between non-covalently-linked *p*-cresol and dodecylguanidine dissolved in  $\text{DMSO-}d_6$ . Dodecylguanidine free base 0.1 *M*, alone (**A**) and with *p*-cresol 0.06 *M* (**B**) and *p*-cresol 0.18 *M* (**C**); and dodecylguanidinium bromide (**D**). Left panel, the region of the phenolic ring protons and the guanidino group protons. Right panel, region of the  $\alpha$ -methylene protons adjacent to the guanidino group; note the expanded  $x$ -axis scale.

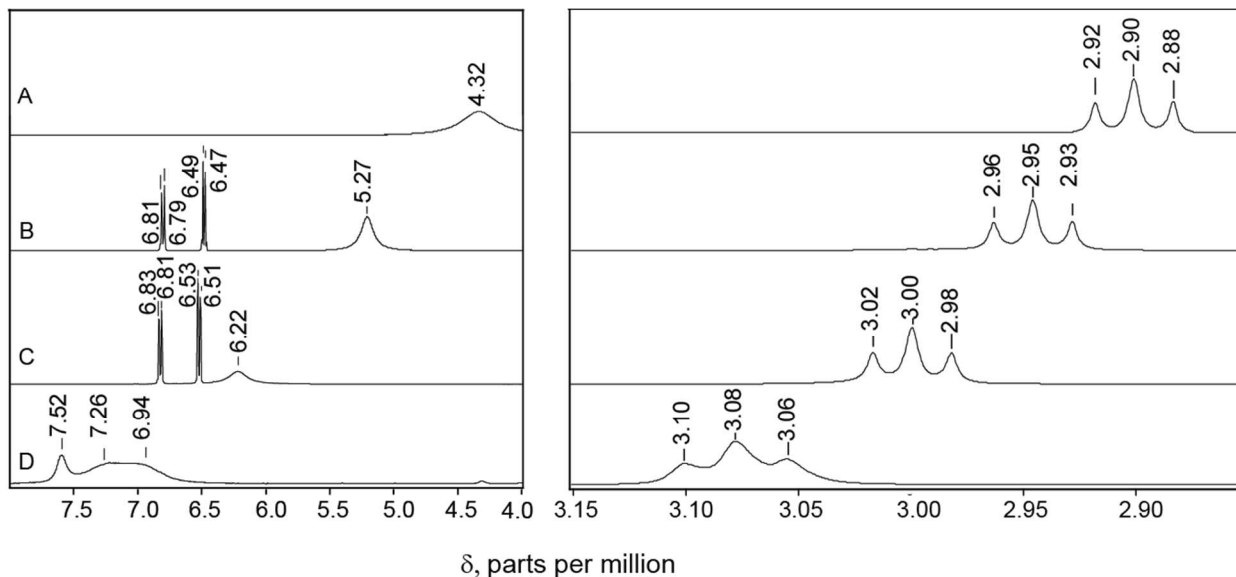

The ring protons of *p*-cresol are clearly affected by the presence of dodecylguanidine. Their chemical shifts in **B** and **C** are intermediate between those seen for *p*-cresol and potassium *p*-cresolate (respectively spectra **C** and **B** in fig. 8-S above, respectively). However, the chemical shifts of these ring protons are not strongly affected by the  $\sim 2$ -fold change in the ratio of *p*-cresol to dodecylguanidine in fig. 9-S, spectra **B** and **C**). The 0.1 *M* dodecylguanidine free base added to both these samples should suffice to largely deprotonate the *p*-cresol, based on Fig. 4B of the main paper. The values reached by the phenol ring protons in **B** and **C** therefore presumably correspond to *p*-cresolate with a guanidinium counterion. This figure confirms that such a species is spectroscopically very different than *p*-cresolate with a  $\text{K}^+$  counterion (Fig. 8-S-**B**), as concluded also from other techniques in the main paper.

The converse effect of phenol on guanidine protons shows a stronger concentration dependence. In the complete absence of *p*-cresol, the guanidine protons are at 4.32 ppm (**A**), but move downfield with increasing amounts of cresol (fig. 9-S-**B**, **C**), trending toward the values seen in the fully protonated form of the HBr salt (dodecylguanidinium bromide; **D**). The guanidinium group with a phenolate counterion (**C**) thus has a chemical shift similar to the same group with a  $\text{Br}^-$  counterion (**D**). The phenol also causes downfield shifts of the methylene protons adjacent to guanidine. These are at 2.90 ppm in the isolated dodecyl guanidine free base (**A**), with increasing amounts of phenol (**B**, **C**) causing the chemical shifts to approach that of fully-protonated dodecyl guanidinium bromide (**D**).

**Figure 10-S.**  $^{13}\text{C}$  NMR spectra in DMSO solution (A-L) or measured as solids with magic-angle spinning (M-P). Spectra A-G and I-L are full ranges of the same measurements that are shown in Fig. 11 of the main paper. The key additional resonance present in these spectra is that of the  $\alpha$ -carbon adjacent to the guanidine group (40.7-43.4 ppm).

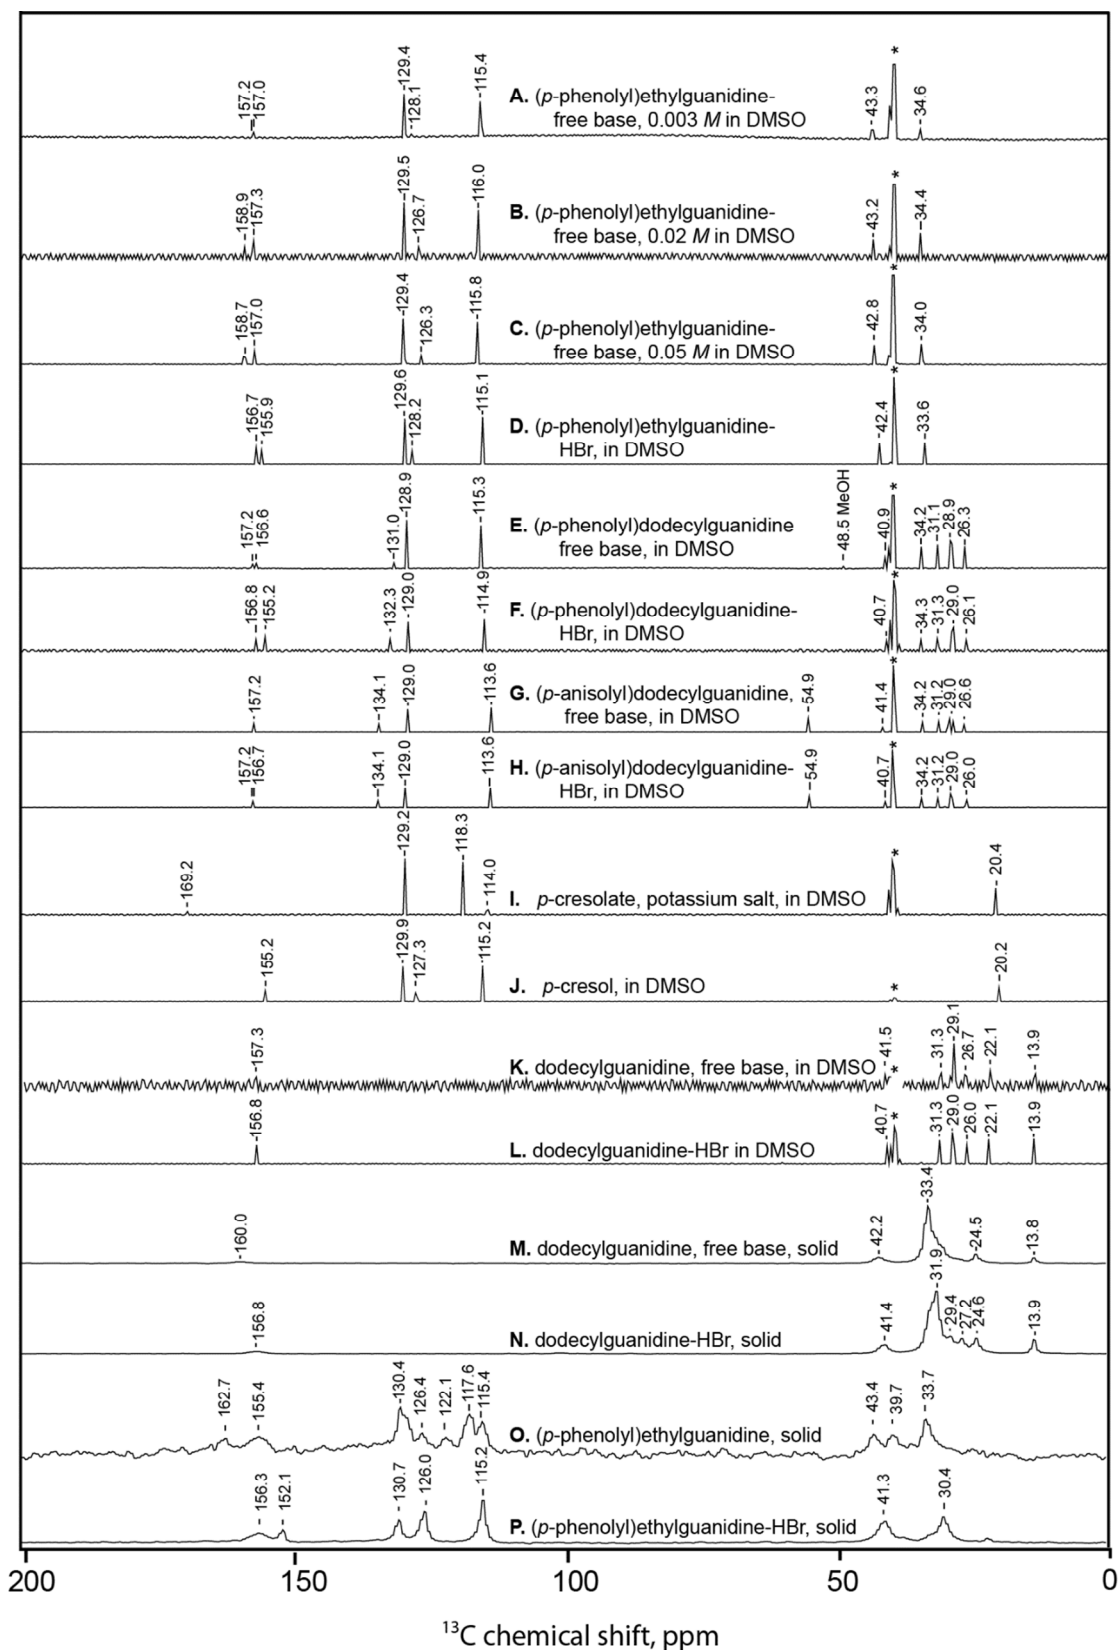

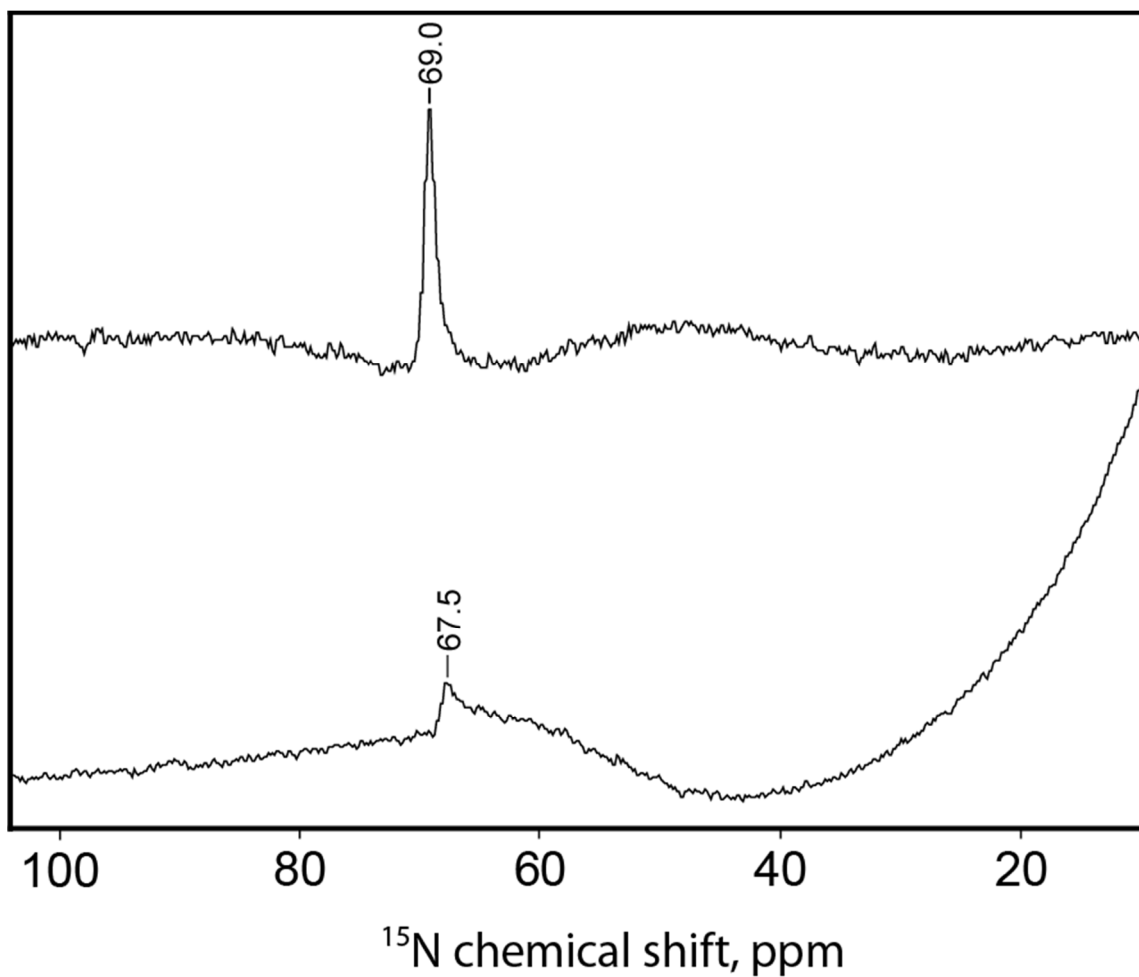

**Figure 11-S.**  $^{15}\text{N}$  NMR spectra of (*p*-phenolyl)dodecylguanidine,  $^{15}\text{N}$ -enriched to >90% in the two terminal nitrogens. Chemical shifts are given relative to 0.5 *M* aqueous ammonium- $^{15}\text{N}$  sulfate. This is same sample of (*p*-phenolyl)dodecylguanidine as in Fig. 11-S-E, i.e. was measured as a 5 *mM* solution in DMSO. Surprisingly, the signals from the  $^{15}\text{N}$ -enriched nitrogens were broadened so much that they were less visible than the signal from the intrachain nitrogen (~62 ppm), which had natural isotope abundance. Raising the temperature appeared to allow broad signals from the terminal nitrogens (near 40 ppm, and possibly also 90 ppm) to start to appear above the noise.
